# Supplementary material for: Synthesis of 1H-isoindoliums by electrophile-mediated cascade cyclization/iodination of propargylamine-based 1,6-diynes
Source: Royal Society of Chemistry journal article supplement (doi:10.1039/d2ob00316c), 2022-01-01

## **Synthesis of 1*H*-Isoindoliums by Electrophile-Mediated Cascade Cyclization/Iodination of Propargylamine-based 1,6-Diynes**

Jian-Fang Cui,<sup>‡c</sup> Qiong Yu,<sup>‡b</sup> Wa-Yi O,<sup>‡ab</sup> Li-Wu Huang,<sup>b</sup> Bin Yang,<sup>a</sup> and  
Man-Kin Wong<sup>\*ab</sup>

*<sup>a</sup> State Key Laboratory of Chemical Biology and Drug Discovery, Department of Applied Biology  
and Chemical Technology, The Hong Kong Polytechnic University, Hung Hom, Hong Kong, China.*

*<sup>b</sup> The Hong Kong Polytechnic University Shenzhen Research Institute, Shenzhen 518057, China.*

*<sup>c</sup> Department of Chemistry, Southern University of Science and Technology, 1088 Xueyuan Blvd.,  
Shenzhen 518055, China.*

mankin.wong@polyu.edu.hk

## **Supporting Information**

## Literature Reference

|                                                                                                                                |                                                                                                                                                                                             |
|--------------------------------------------------------------------------------------------------------------------------------|---------------------------------------------------------------------------------------------------------------------------------------------------------------------------------------------|
| 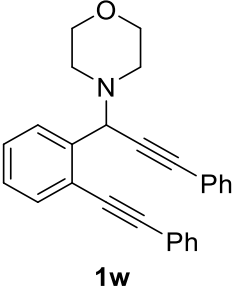 <p style="text-align: center;"><b>1w</b></p> | <p style="text-align: center;">D. M. Lustosa, P. Cieslik, D. Hartmann,<br/>T. Bruckhoff, M. Rudolph, F. Romingera, A. S. K.<br/>Hashmi, <i>Org. Chem. Front.</i>, 2019, <b>6</b>, 1655.</p> |
|--------------------------------------------------------------------------------------------------------------------------------|---------------------------------------------------------------------------------------------------------------------------------------------------------------------------------------------|

## General Methods

Chemicals purchased from commercial sources were used without further purification. Flash column chromatography was performed using silica gel 60 (230-400 mesh ASTM).  $^1\text{H}$  NMR,  $^{13}\text{C}$  NMR and  $^{19}\text{F}$  NMR spectra were recorded on Bruker DPX-400 and Ascend<sup>TM</sup>-600 spectrometers. Chemical shifts (ppm) were referenced to TMS and coupling constants are given in Hz. Data for  $^1\text{H}$  NMR were recorded as follows: chemical shift ( $\delta$ , ppm), multiplicity (s, singlet; brs, broad singlet; d, doublet; dd, double doublet; t, triplet; td, triple doublet; tt, triple triplet; q, quartet; qd, quadruple doublet, m, multiplet), coupling constant (Hz), integration. Data for  $^{13}\text{C}$  NMR are reported in terms of chemical shift ( $\delta$ , ppm). Data for  $^{19}\text{F}$  NMR are reported in terms of chemical shift ( $\delta$ , ppm). High resolution mass spectra (HRMS) were measured on Agilent 6540 UHD Accurate-Mass Q-TOF LC/MS, Waters Synapt G2 Q-TOF MS and Thermo Scientific Q Executive.

**Table S1** Scope of gold-catalyzed three-component coupling of aldehydes, amines, alkynes.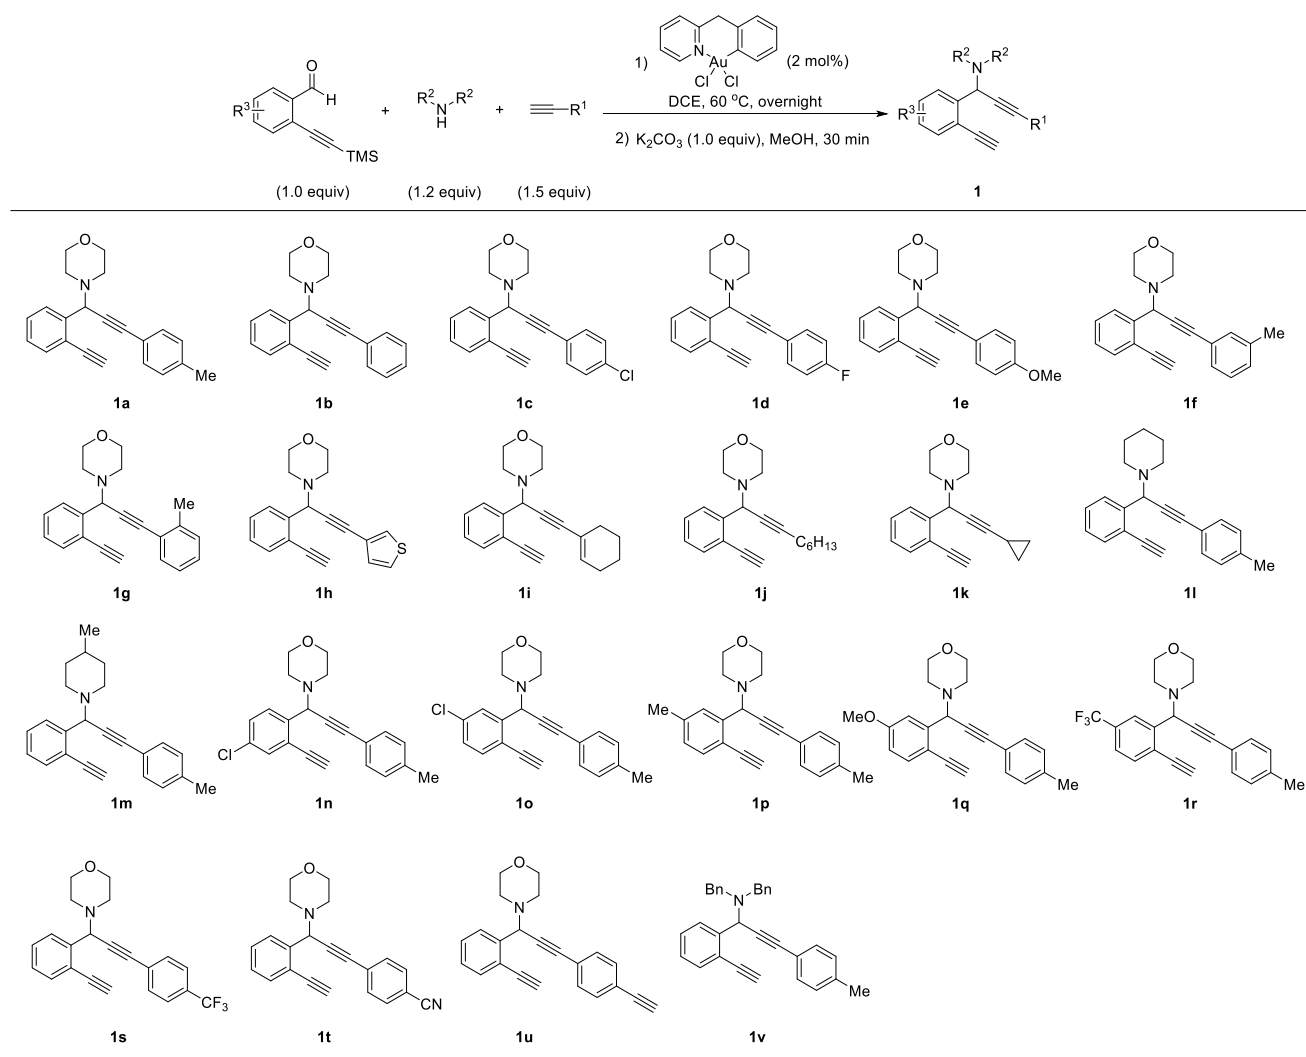

### General procedure for three-component coupling of aldehydes, amines, and alkynes

Aldehyde (5 mmol, 1.0 equiv), amine (6 mmol, 1.2 equiv), alkyne (7.5 mmol, 1.5 equiv), Au(III) catalyst (0.1 mmol, 0.02 equiv) and DCE (10 mL) were added to a dried 50 mL round bottomed flask containing a magnetic stirring bar. The reaction mixture was stirred at 60 °C for overnight. The residues were purified by flash chromatography using EtOAc-Petroleum Ether as eluent to give the desired products. The product was then treated with K<sub>2</sub>CO<sub>3</sub> (5 mmol, 1 equiv) in MeOH (10 mL), the reaction mixture was stirred at rt. When the reaction was completed, as monitored by TLC, water was added. The solid product was separated by suction filtration if solid was precipitated. Or the liquid product was purified by extracting by EtOAc following by flash column chromatography using EtOAc-Petroleum Ether as eluent.

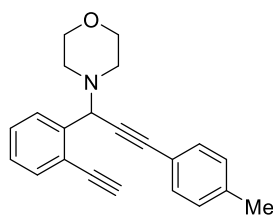

1a

White solid, 54% yield for two steps

**<sup>1</sup>H NMR** (400 MHz, CDCl<sub>3</sub>) δ 7.64 (d, *J* = 7.7 Hz, 1H), 7.45 (dd, *J* = 7.6, 1.5 Hz, 1H), 7.29 (d, *J* = 8.0 Hz, 3H), 7.22 – 7.14 (m, 1H), 7.03 (d, *J* = 7.9 Hz, 2H), 5.09 (s, 1H), 3.67 – 3.54 (m, 4H), 3.24 (s, 1H), 2.68 – 2.48 (m, 4H), 2.26 (s, 3H).

**<sup>13</sup>C NMR** (100 MHz, CDCl<sub>3</sub>) δ 140.54, 138.32, 133.14, 131.62, 128.99, 128.76, 128.49, 127.60, 122.46, 119.78, 87.93, 84.62, 81.85, 81.75, 67.04, 59.77, 50.01, 21.45.

**HRMS (ESI):** [M+H]<sup>+</sup> Calcd. for [C<sub>22</sub>H<sub>22</sub>NO]<sup>+</sup> 316.1696, found 316.1693.

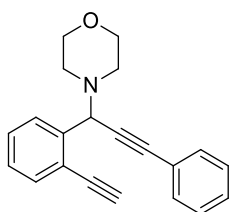

1b

White solid, 74% yield for two steps

**<sup>1</sup>H NMR** (400 MHz, CDCl<sub>3</sub>) δ 7.73 (d, *J* = 7.7 Hz, 1H), 7.54 (dd, *J* = 7.6, 1.1 Hz, 1H), 7.51 – 7.45 (m, 2H), 7.37 (td, *J* = 7.6, 1.3 Hz, 1H), 7.34 – 7.25 (m, 4H), 5.18 (s, 1H), 3.75 – 3.66 (m, 4H), 3.33 (s, 1H), 2.73 – 2.62 (m, 4H).

**<sup>13</sup>C NMR** (100 MHz, CDCl<sub>3</sub>) δ 140.47, 133.18, 131.75, 128.73, 128.49, 128.25, 128.22, 127.64, 122.91, 122.50, 87.86, 85.43, 81.88, 81.75, 67.04, 59.78, 50.05.

**HRMS (ESI):** [M+H]<sup>+</sup> Calcd. for [C<sub>21</sub>H<sub>20</sub>NO]<sup>+</sup> 302.1539, found 302.1545.

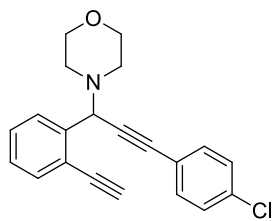

**1c**

White solid, 71% yield for two steps

**<sup>1</sup>H NMR** (400 MHz, CDCl<sub>3</sub>) δ 7.69 (d, *J* = 7.7 Hz, 1H), 7.54 (dd, *J* = 7.6, 0.9 Hz, 1H), 7.44 – 7.34 (m, 3H), 7.31 – 7.25 (m, 3H), 5.17 (s, 1H), 3.73 – 3.65 (m, 4H), 3.34 (s, 1H), 2.72 – 2.60 (m, 4H).

**<sup>13</sup>C NMR** (100 MHz, CDCl<sub>3</sub>) δ 140.20, 134.25, 133.22, 132.96, 128.64, 128.58, 128.53, 127.72, 122.49, 121.34, 86.69, 86.55, 81.98, 81.65, 66.99, 59.76, 50.06.

**HRMS (ESI):** [M+H]<sup>+</sup> Calcd. for [C<sub>21</sub>H<sub>19</sub>ClNO]<sup>+</sup> 336.1150, found 336.1161.

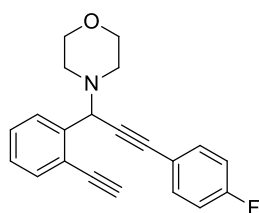

**1d**

White solid, 28% yield for two steps

**<sup>1</sup>H NMR** (400 MHz, CDCl<sub>3</sub>) δ 7.70 (d, *J* = 7.6 Hz, 1H), 7.58 – 7.51 (m, 1H), 7.49 – 7.42 (m, 2H), 7.40 – 7.33 (m, 1H), 7.31 – 7.24 (m, 1H), 7.00 (t, *J* = 8.7 Hz, 2H), 5.16 (s, 1H), 3.77 – 3.61 (m, 4H), 3.34 (s, 1H), 2.75 – 2.57 (m, 4H).

**<sup>13</sup>C NMR** (100 MHz, CDCl<sub>3</sub>) δ 163.66, 161.18, 140.32, 133.64, 133.55, 133.18, 128.63, 128.50, 127.67, 122.48, 118.94, 118.91, 115.61, 115.39, 86.71, 85.16, 85.14, 81.96, 81.67, 66.98, 59.71, 50.04.

**<sup>19</sup>F NMR** (376 MHz, CDCl<sub>3</sub>) δ -110.90.

**HRMS (ESI):** [M+H]<sup>+</sup> Calcd. for [C<sub>21</sub>H<sub>19</sub>FNO]<sup>+</sup> 320.1445, found 320.1449.

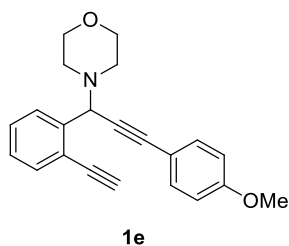

Grey solid, 50% yield for two steps

**<sup>1</sup>H NMR** (400 MHz, CDCl<sub>3</sub>) δ 7.73 (d, *J* = 7.7 Hz, 1H), 7.54 (d, *J* = 7.6 Hz, 1H), 7.42 (d, *J* = 8.7 Hz, 2H), 7.37 (t, *J* = 7.5 Hz, 1H), 7.27 (t, *J* = 7.4 Hz, 1H), 6.84 (d, *J* = 8.7 Hz, 2H), 5.17 (s, 1H), 3.81 (s, 3H), 3.76 – 3.64 (m, 4H), 3.33 (s, 1H), 2.76 – 2.56 (m, 4H).

**<sup>13</sup>C NMR** (100 MHz, CDCl<sub>3</sub>) δ 159.44, 140.54, 133.07, 128.68, 128.42, 127.52, 122.37, 114.89, 113.78, 87.59, 83.82, 81.88, 81.69, 66.94, 59.69, 55.16, 49.95.

**HRMS (ESI):** [M+H]<sup>+</sup> Calcd. for [C<sub>22</sub>H<sub>22</sub>NO<sub>2</sub>]<sup>+</sup> 332.1645, found 332.1646.

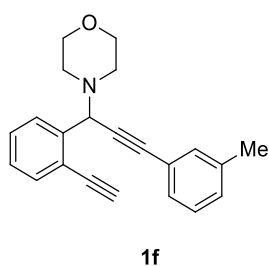

White solid, 64% yield for two steps

**<sup>1</sup>H NMR** (400 MHz, CDCl<sub>3</sub>) δ 7.46 (d, *J* = 7.6 Hz, 1H), 7.28 (d, *J* = 7.6 Hz, 1H), 7.10 (t, *J* = 7.1 Hz, 1H), 7.06 – 6.97 (m, 3H), 6.94 (t, *J* = 7.6 Hz, 1H), 6.86 (d, *J* = 7.2 Hz, 1H), 4.91 (s, 1H), 3.55 – 3.33 (m, 4H), 3.06 (s, 1H), 2.55 – 2.26 (m, 4H), 2.07 (s, 3H).

**<sup>13</sup>C NMR** (100 MHz, CDCl<sub>3</sub>) δ 140.50, 137.95, 133.17, 132.34, 129.12, 128.79, 128.75, 128.49, 128.16, 127.63, 122.67, 122.47, 88.05, 84.96, 81.86, 81.75, 67.04, 59.77, 50.01, 21.17.

**HRMS (ESI):** [M+H]<sup>+</sup> Calcd. for [C<sub>22</sub>H<sub>22</sub>NO]<sup>+</sup> 316.1696, found 316.1695.

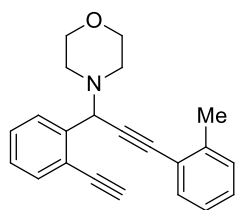

**1g**

White solid, 64% yield for two steps

**<sup>1</sup>H NMR** (400 MHz, CDCl<sub>3</sub>) δ 7.50 (s, 1H), 7.28 (d, *J* = 7.5 Hz, 1H), 7.19 (d, *J* = 7.5 Hz, 1H), 7.11 (t, *J* = 7.4 Hz, 1H), 7.05 – 6.91 (m, 3H), 6.90 – 6.81 (m, 1H), 4.98 (s, 1H), 3.60 – 3.28 (m, 4H), 3.08 (s, 1H), 2.58 – 2.31 (m, 4H), 2.20 (s, 3H).

**<sup>13</sup>C NMR** (100 MHz, CDCl<sub>3</sub>) δ 140.61, 140.05, 133.19, 132.15, 129.39, 128.70, 128.43, 128.22, 127.61, 125.48, 122.71, 122.46, 89.15, 86.76, 81.88, 81.73, 67.01, 59.94, 49.98, 21.08.

**HRMS (ESI):** [M+H]<sup>+</sup> Calcd. for [C<sub>22</sub>H<sub>22</sub>NO]<sup>+</sup> 316.1696, found 316.1695.

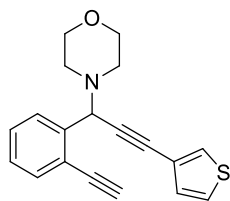

**1h**

White solid, 68% yield for two steps

**<sup>1</sup>H NMR** (400 MHz, CDCl<sub>3</sub>) δ 7.71 (d, *J* = 7.8 Hz, 1H), 7.54 (dd, *J* = 7.6, 1.0 Hz, 1H), 7.46 (dd, *J* = 2.9, 0.9 Hz, 1H), 7.37 (td, *J* = 7.6, 1.2 Hz, 1H), 7.31 – 7.25 (m, 2H), 7.14 (dd, *J* = 5.0, 1.0 Hz, 1H), 5.16 (s, 1H), 3.81 – 3.60 (m, 4H), 3.33 (s, 1H), 2.77 – 2.55 (m, 4H).

**<sup>13</sup>C NMR** (100 MHz, CDCl<sub>3</sub>) δ 140.40, 133.18, 130.01, 128.75, 128.69, 128.54, 127.67, 125.25, 122.47, 121.87, 85.06, 82.80, 81.91, 81.73, 67.03, 59.81, 50.07.

**HRMS (ESI):** [M+H]<sup>+</sup> Calcd. for [C<sub>19</sub>H<sub>18</sub>NOS]<sup>+</sup> 308.1104, found 308.1102.

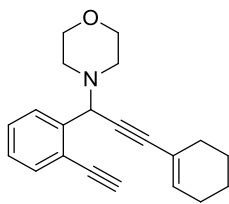

1i

Grey solid, 68% yield for two steps

**<sup>1</sup>H NMR** (400 MHz, CDCl<sub>3</sub>) δ 7.64 (dd, *J* = 7.7, 1.5 Hz, 1H), 7.51 (dd, *J* = 7.6, 1.6 Hz, 1H), 7.34 (td, *J* = 7.6, 1.6 Hz, 1H), 7.27 – 7.22 (m, 1H), 6.14 (m, 1H), 5.06 (s, 1H), 3.71 – 3.62 (m, 4H), 3.29 (s, 1H), 2.65 – 2.52 (m, 4H), 2.20 – 2.07 (m, 4H), 1.65 – 1.56 (m, 4H).

**<sup>13</sup>C NMR** (100 MHz, CDCl<sub>3</sub>) δ 140.85, 134.79, 133.09, 128.72, 128.43, 127.48, 122.42, 120.37, 89.74, 82.37, 81.82, 81.71, 67.05, 59.68, 49.94, 29.49, 25.58, 22.28, 21.49.

**HRMS** (ESI): [M+H]<sup>+</sup> Calcd. for [C<sub>21</sub>H<sub>24</sub>NO]<sup>+</sup> 306.1852, found 306.1861.

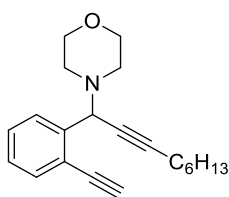

1j

Red solid, 13% yield for two steps

**<sup>1</sup>H NMR** (400 MHz, CDCl<sub>3</sub>) δ 7.64 (d, *J* = 7.2 Hz, 1H), 7.51 (dd, *J* = 7.6, 1.0 Hz, 1H), 7.34 (td, *J* = 7.6, 1.2 Hz, 1H), 7.23 (dd, *J* = 7.5, 1.2 Hz, 1H), 4.92 (t, *J* = 2.0 Hz, 1H), 3.73 – 3.61 (m, 4H), 3.29 (s, 1H), 2.65 – 2.45 (m, 4H), 2.27 (td, *J* = 7.0, 2.1 Hz, 2H), 1.54 (q, *J* = 7.3 Hz, 2H), 1.46 – 1.37 (m, 2H), 1.34 – 1.25 (m, 4H), 0.89 (t, *J* = 6.9 Hz, 3H).

**<sup>13</sup>C NMR** (100 MHz, CDCl<sub>3</sub>) δ 141.14, 133.05, 128.68, 128.41, 127.40, 122.39, 99.98, 88.21, 81.86, 81.65, 75.88, 67.06, 59.32, 49.96, 31.29, 28.89, 28.58, 22.55, 18.79, 14.02.

**HRMS** (ESI): [M+H]<sup>+</sup> Calcd. for [C<sub>21</sub>H<sub>28</sub>NO]<sup>+</sup> 310.2165, found 310.2172.



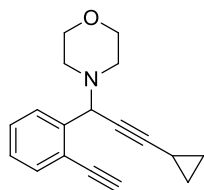

1k

White solid, 58% yield for two steps

**<sup>1</sup>H NMR** (400 MHz, CDCl<sub>3</sub>) δ 7.58 (dd, *J* = 7.9, 1.5 Hz, 1H), 7.47 (dd, *J* = 7.6, 1.6 Hz, 1H), 7.32 (td, *J* = 7.6, 1.5 Hz, 1H), 7.25 – 7.19 (m, 1H), 4.86 (d, *J* = 2.0 Hz, 1H), 3.69 – 3.59 (m, 4H), 3.26 (s, 1H), 2.60 – 2.45 (m, 4H), 1.32 – 1.25 (m, 1H), 0.80 – 0.71 (m, 2H), 0.71 – 0.63 (m, 2H).

**<sup>13</sup>C NMR** (100 MHz, CDCl<sub>3</sub>) δ 141.16, 133.19, 128.79, 128.58, 127.56, 122.52, 91.40, 81.96, 81.83, 71.23, 67.18, 59.40, 50.08, 8.58, 8.54, -0.30.

**HRMS** (ESI): [M+H]<sup>+</sup> Calcd. for [C<sub>18</sub>H<sub>20</sub>NO]<sup>+</sup> 266.1539, found 266.1544.

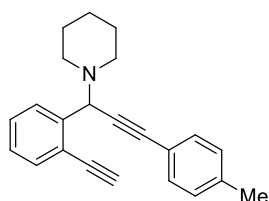

1l

Yellow solid, 63% yield for two steps

**<sup>1</sup>H NMR** (400 MHz, CDCl<sub>3</sub>) δ 7.72 (d, *J* = 7.7 Hz, 1H), 7.52 (dd, *J* = 7.6, 1.1 Hz, 1H), 7.40 – 7.31 (m, 3H), 7.24 (td, *J* = 7.6, 1.2 Hz, 1H), 7.11 (d, *J* = 7.9 Hz, 2H), 5.16 (s, 1H), 3.31 (s, 1H), 2.71 – 2.50 (m, 4H), 2.34 (s, 3H), 1.56 (dq, *J* = 10.5, 5.4 Hz, 4H), 1.41 (dd, *J* = 11.4, 5.6 Hz, 2H).

**<sup>13</sup>C NMR** (100 MHz, CDCl<sub>3</sub>) δ 141.49, 138.04, 133.05, 131.63, 128.95, 128.79, 128.31, 127.25, 122.44, 120.22, 87.28, 85.80, 81.98, 81.63, 60.11, 50.86, 26.08, 24.47, 21.42.

**HRMS** (ESI): [M+H]<sup>+</sup> Calcd. for [C<sub>23</sub>H<sub>24</sub>N]<sup>+</sup> 314.1903, found 314.1918.

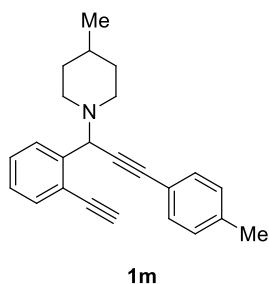

Yellow solid, 69% yield for two steps

**<sup>1</sup>H NMR** (400 MHz, CDCl<sub>3</sub>) δ 7.65 (d, *J* = 7.2 Hz, 1H), 7.45 (dd, *J* = 7.6, 1.0 Hz, 1H), 7.34 – 7.26 (m, 3H), 7.18 (td, *J* = 7.6, 1.2 Hz, 1H), 7.03 (d, *J* = 7.9 Hz, 2H), 5.11 (s, 1H), 3.24 (s, 1H), 2.85 (t, *J* = 9.0 Hz, 2H), 2.35 – 2.25 (m, 4H), 2.16 (td, *J* = 11.6, 2.4 Hz, 1H), 1.58 – 1.45 (m, 2H), 1.33 – 1.05 (m, 3H), 0.81 (d, *J* = 6.2 Hz, 3H).

**<sup>13</sup>C NMR** (100 MHz, CDCl<sub>3</sub>) δ 141.54, 138.05, 133.04, 131.61, 128.94, 128.78, 128.35, 127.27, 122.39, 120.19, 87.27, 85.82, 81.95, 81.67, 59.78, 52.24, 48.30, 34.55, 34.21, 30.80, 21.84, 21.42.

**HRMS** (ESI): [M+H]<sup>+</sup> Calcd. for [C<sub>24</sub>H<sub>26</sub>N]<sup>+</sup> 328.2060, found 328.1956.

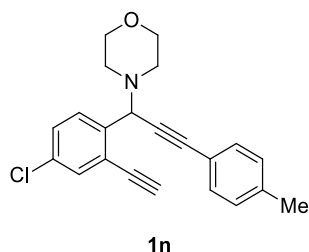

White solid, 69% yield for two steps

**<sup>1</sup>H NMR** (600 MHz, CDCl<sub>3</sub>) δ 7.66 (d, *J* = 8.3 Hz, 1H), 7.52 (d, *J* = 2.3 Hz, 1H), 7.37 (d, *J* = 7.8 Hz, 2H), 7.34 (d, *J* = 7.9 Hz, 1H), 7.13 (d, *J* = 7.8 Hz, 2H), 5.10 (s, 1H), 3.77 – 3.62 (m, 4H), 3.37 (s, 1H), 2.73 – 2.54 (m, 4H), 2.36 (s, 3H).

**<sup>13</sup>C NMR** (150 MHz, CDCl<sub>3</sub>) δ 139.30, 138.54, 133.35, 132.80, 131.66, 130.09, 129.07, 128.75, 124.09, 119.59, 88.35, 84.06, 82.97, 80.47, 67.03, 59.35, 50.02, 21.48.

**HRMS** (ESI): [M+H]<sup>+</sup> Calcd. for [C<sub>22</sub>H<sub>21</sub>ClNO]<sup>+</sup> 350.1306, found 350.1303.

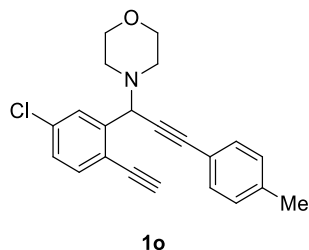

White solid, 35% yield for two steps

**<sup>1</sup>H NMR** (400 MHz, CDCl<sub>3</sub>) δ 7.70 (d, *J* = 2.1 Hz, 1H), 7.46 (d, *J* = 8.2 Hz, 1H), 7.38 (d, *J* = 8.1 Hz, 2H), 7.25 (dd, *J* = 8.2, 2.2 Hz, 1H), 7.13 (d, *J* = 7.9 Hz, 2H), 5.11 (s, 1H), 3.76 – 3.62 (m, 4H), 3.36 (s, 1H), 2.73 – 2.56 (m, 4H), 2.35 (s, 3H).

**<sup>13</sup>C NMR** (100 MHz, CDCl<sub>3</sub>) δ 142.64, 138.55, 134.65, 134.25, 131.68, 129.04, 128.90, 127.91, 120.95, 119.50, 88.55, 83.69, 82.75, 80.78, 66.97, 59.61, 50.04, 21.44.

**HRMS** (ESI): [M+H]<sup>+</sup> Calcd. for [C<sub>22</sub>H<sub>21</sub>ClNO]<sup>+</sup> 350.1306, found 350.1311.

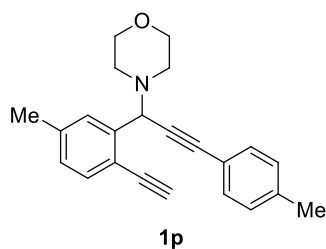

White solid, 74% yield for two steps

**<sup>1</sup>H NMR** (400 MHz, CDCl<sub>3</sub>) δ 7.51 (s, 1H), 7.42 (d, *J* = 7.8 Hz, 1H), 7.38 (d, *J* = 8.1 Hz, 2H), 7.12 (d, *J* = 7.9 Hz, 2H), 7.07 (d, *J* = 7.8 Hz, 1H), 5.13 (s, 1H), 3.76 – 3.64 (m, 4H), 3.28 (s, 1H), 2.77 – 2.67 (m, 2H), 2.67 – 2.58 (m, 2H), 2.37 (s, 3H), 2.34 (s, 3H).

**<sup>13</sup>C NMR** (100 MHz, CDCl<sub>3</sub>) δ 140.31, 138.74, 138.25, 132.96, 131.62, 129.38, 128.97, 128.41, 119.88, 119.49, 87.70, 84.94, 81.93, 81.18, 67.01, 59.72, 50.12, 21.58, 21.40.

**HRMS** (ESI): [M+H]<sup>+</sup> Calcd. for [C<sub>23</sub>H<sub>24</sub>NO]<sup>+</sup> 330.1852, found 330.1855.

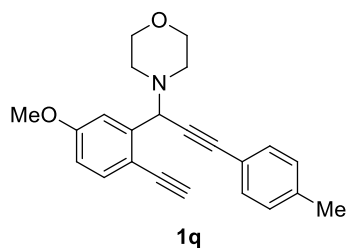

White solid, 70% yield for two steps

**<sup>1</sup>H NMR** (400 MHz, CDCl<sub>3</sub>) δ 7.50 (d, *J* = 8.5 Hz, 1H), 7.37 (d, *J* = 8.0 Hz, 2H), 7.29 (d, *J* = 2.6 Hz, 1H), 7.12 (d, *J* = 7.9 Hz, 2H), 6.80 (dd, *J* = 8.5, 2.7 Hz, 1H), 5.13 (s, 1H), 3.84 (s, 3H), 3.77 – 3.64 (m, 4H), 3.26 (s, 1H), 2.78 – 2.69 (m, 2H), 2.68 – 2.58 (m, 2H), 2.35 (s, 3H).

**<sup>13</sup>C NMR** (100 MHz, CDCl<sub>3</sub>) δ 159.68, 142.39, 138.32, 134.42, 131.62, 128.98, 119.78, 114.73, 114.62, 112.98, 87.87, 84.68, 81.79, 80.44, 67.03, 59.85, 55.35, 50.15, 21.41.

**HRMS** (ESI): [M+H]<sup>+</sup> Calcd. for [C<sub>23</sub>H<sub>24</sub>NO<sub>2</sub>]<sup>+</sup> 346.1802, found 346.1801.

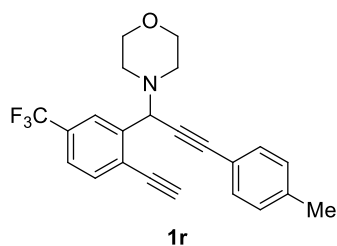

Yellow oil, 55% yield for two steps

**<sup>1</sup>H NMR** (400 MHz, CDCl<sub>3</sub>) δ 8.02 (s, 1H), 7.66 (d, *J* = 8.0 Hz, 1H), 7.55 (d, *J* = 8.0 Hz, 1H), 7.40 (d, *J* = 8.0 Hz, 2H), 7.15 (d, *J* = 7.9 Hz, 2H), 5.20 (s, 1H), 3.79 – 3.63 (m, 4H), 3.48 (s, 1H), 2.75 – 2.59 (m, 4H), 2.37 (s, 3H).

**<sup>13</sup>C NMR** (100 MHz, CDCl<sub>3</sub>) δ 141.86, 138.64, 133.56, 131.66, 130.29 (q, *J* = 32.5 Hz), 129.07, 126.22 (q, *J* = 1.3 Hz), 125.43 (q, *J* = 11.4 Hz), 124.41 (q, *J* = 3.6 Hz), 123.75 (q, *J* = 270.8 Hz), 119.40, 88.94, 84.21, 83.33, 80.53, 66.93, 59.68, 50.01, 21.40.

**<sup>19</sup>F NMR** (376 MHz, CDCl<sub>3</sub>) δ -62.70.

**HRMS** (ESI): [M+H]<sup>+</sup> Calcd. for [C<sub>23</sub>H<sub>21</sub>F<sub>3</sub>NO]<sup>+</sup> 384.1570, found 384.1569.

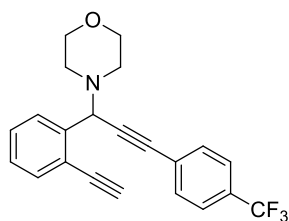

**1s**

Yellow solid, 48% yield for two steps

**<sup>1</sup>H NMR** (400 MHz, CDCl<sub>3</sub>) δ 7.70 (dd, *J* = 7.7, 1.3 Hz, 1H), 7.62 – 7.52 (m, 5H), 7.38 (td, *J* = 7.6, 1.5 Hz, 1H), 7.29 (td, *J* = 7.6, 1.4 Hz, 1H), 5.20 (s, 1H), 3.77 – 3.64 (m, 4H), 3.35 (s, 1H), 2.76 – 2.58 (m, 4H).

**<sup>13</sup>C NMR** (100 MHz, CDCl<sub>3</sub>) δ 139.98, 133.28, 132.00, 130.01 (q, *J* = 32.6 Hz), 128.59, 128.55, 127.81, 126.67, 125.19 (q, *J* = 3.8 Hz), 124.2 (q, *J* = 273.2 Hz), 122.55, 88.22, 86.52, 82.06, 81.59, 66.97, 59.79, 50.09.

**<sup>19</sup>F NMR** (376 MHz, CDCl<sub>3</sub>) δ -62.77.

**HRMS (ESI):** [M+H]<sup>+</sup> Calcd. for [C<sub>22</sub>H<sub>19</sub>F<sub>3</sub>NO]<sup>+</sup> 370.1413, found 370.1455.

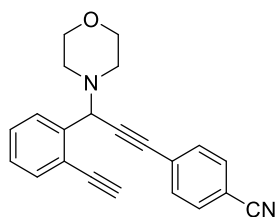

**1t**

Yellow solid, 40% yield for two steps

**<sup>1</sup>H NMR** (400 MHz, CDCl<sub>3</sub>) δ 7.69 – 7.63 (m, 1H), 7.60 (d, *J* = 8.4 Hz, 2H), 7.55 (d, *J* = 7.8 Hz, 3H), 7.38 (td, *J* = 7.6, 1.3 Hz, 1H), 7.29 (td, *J* = 7.5, 1.2 Hz, 1H), 5.20 (s, 1H), 3.74 – 3.65 (m, 4H), 3.35 (s, 1H), 2.73 – 2.58 (m, 4H).

**<sup>13</sup>C NMR** (100 MHz, CDCl<sub>3</sub>) δ 139.88, 133.50, 132.46, 132.16, 128.77, 128.70, 128.09, 127.91, 122.72, 118.54, 111.83, 90.58, 86.45, 82.34, 81.69, 67.12, 60.00, 50.29.

**HRMS (ESI):** [M+H]<sup>+</sup> Calcd. for [C<sub>22</sub>H<sub>19</sub>N<sub>2</sub>O]<sup>+</sup> 327.1492, found 327.1497.

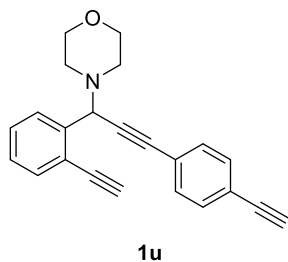

Pale yellow solid, 40% yield for two steps

**<sup>1</sup>H NMR** (400 MHz, CDCl<sub>3</sub>) δ 7.70 (dd, *J* = 7.8, 1.3 Hz, 1H), 7.55 (dd, *J* = 7.6, 1.4 Hz, 1H), 7.43 (s, 4H), 7.38 (td, *J* = 7.6, 1.5 Hz, 1H), 7.31 – 7.26 (m, 1H), 5.19 (s, 1H), 3.70 (dt, *J* = 5.8, 3.8 Hz, 4H), 3.34 (s, 1H), 3.17 (s, 1H), 2.74 – 2.59 (m, 4H).

**<sup>13</sup>C NMR** (100 MHz, CDCl<sub>3</sub>) δ 140.39, 133.43, 132.18, 131.84, 128.87, 128.75, 127.94, 123.55, 122.70, 122.12, 87.82, 87.49, 83.36, 82.18, 81.87, 79.05, 67.21, 60.02, 50.28.

**HRMS** (ESI): [M+H]<sup>+</sup> Calcd. for [C<sub>23</sub>H<sub>20</sub>NO]<sup>+</sup> 326.1539, found 326.1539.

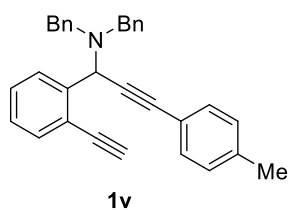

Yellow solid, 24% yield for two steps

**<sup>1</sup>H NMR** (400 MHz, CDCl<sub>3</sub>) δ 7.76 (d, *J* = 7.7 Hz, 1H), 7.41 (d, *J* = 8.1 Hz, 2H), 7.38 (dd, *J* = 7.6, 1.3 Hz, 1H), 7.29 – 7.25 (m, 4H), 7.21 – 7.14 (m, 5H), 7.11 (dd, *J* = 7.6, 5.4 Hz, 5H), 5.28 (s, 1H), 3.71 (d, *J* = 13.3 Hz, 2H), 3.49 (d, *J* = 13.3 Hz, 2H), 2.64 (s, 1H), 2.30 (s, 3H).

**<sup>13</sup>C NMR** (100 MHz, CDCl<sub>3</sub>) δ 141.18, 139.42, 138.51, 133.60, 131.94, 130.02, 129.81, 129.27, 128.20, 128.04, 127.66, 126.94, 122.68, 120.28, 88.87, 84.56, 82.17, 81.45, 55.73, 55.16, 21.66.

**HRMS** (ESI): [M+H]<sup>+</sup> Calcd. for [C<sub>32</sub>H<sub>28</sub>N]<sup>+</sup> 426.2216, found 426.2215.

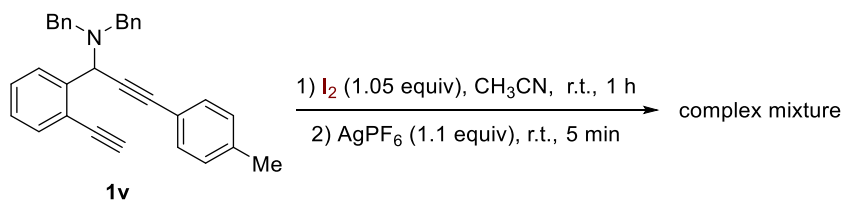

**Scheme S1** Reaction of **1v** with I<sub>2</sub> under the optimized reaction conditions

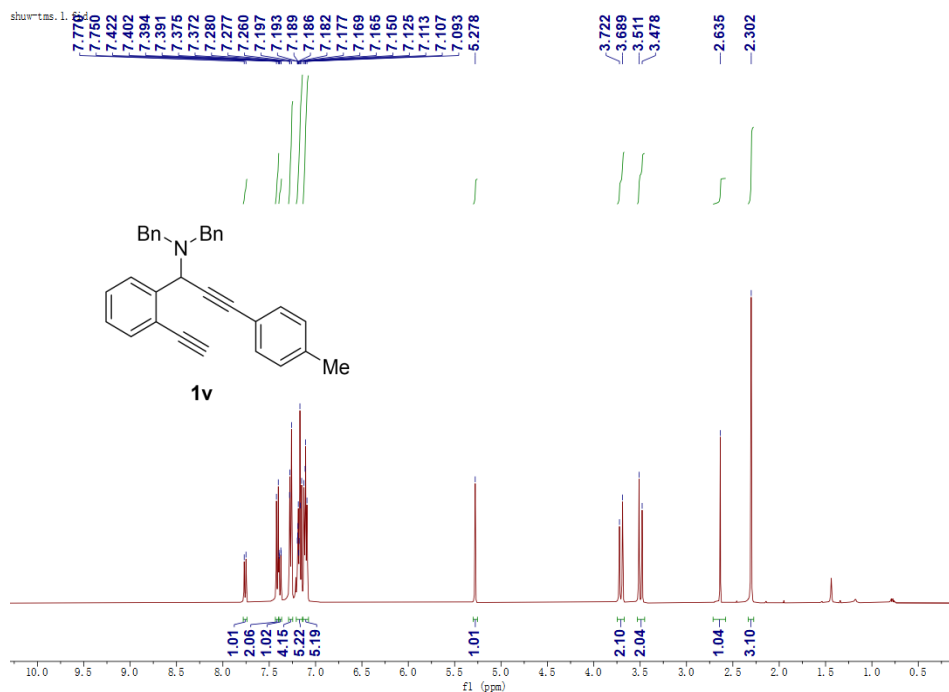

**Figure S1** <sup>1</sup>H NMR spectrum of **1v**

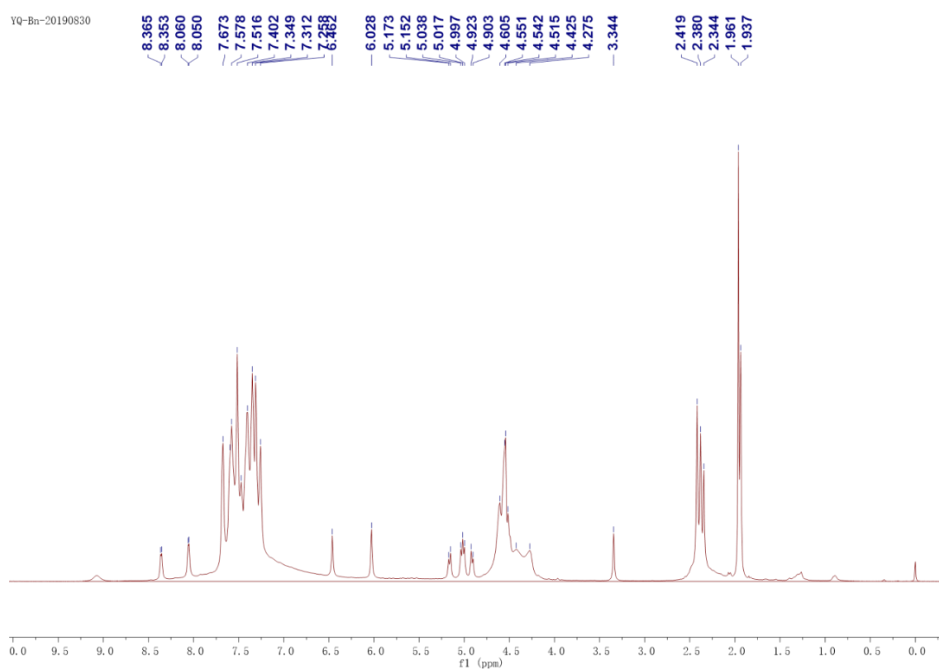

**Figure S2** <sup>1</sup>H NMR spectrum of crude reaction mixture of **1v** with I<sub>2</sub>

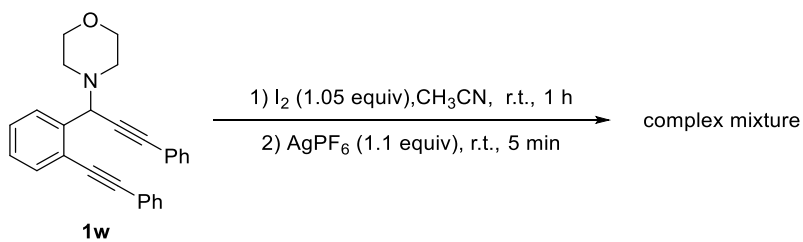

**Scheme S2** Reaction of **1w** with  $\text{I}_2$  under the optimized reaction conditions

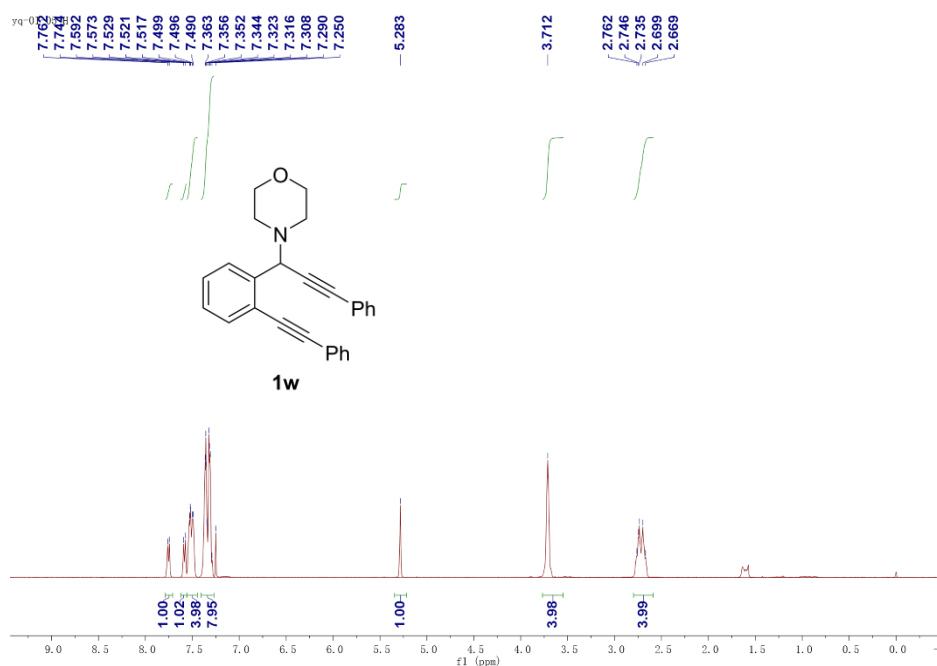

**Figure S3**  $^1\text{H}$  NMR spectrum of **1w**

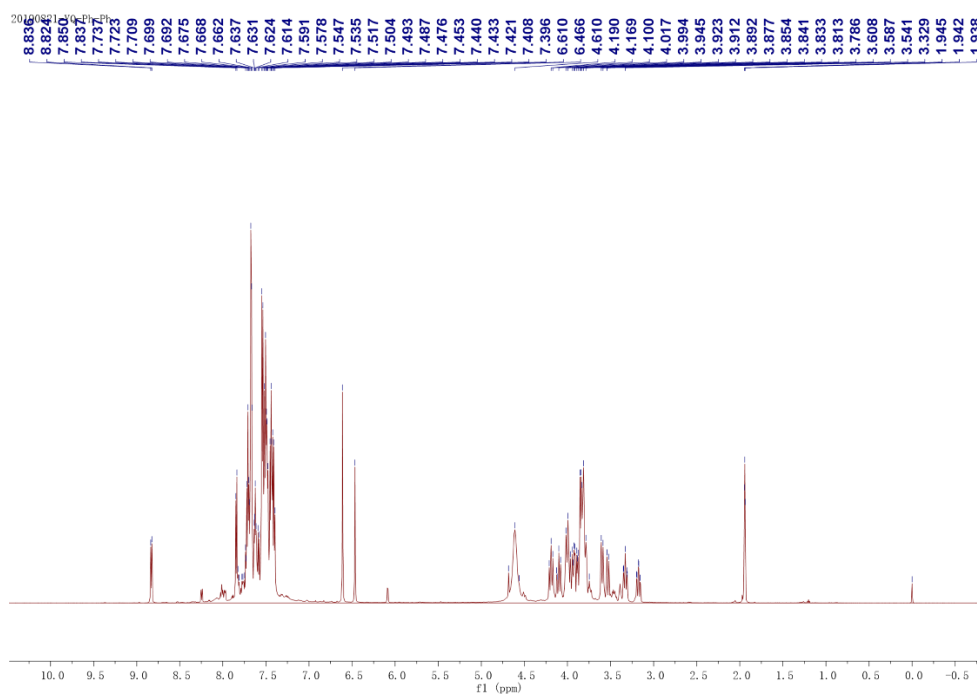

**Figure S4**  $^1\text{H}$  NMR spectrum of the crude reaction mixture of **1w** with  $\text{I}_2$



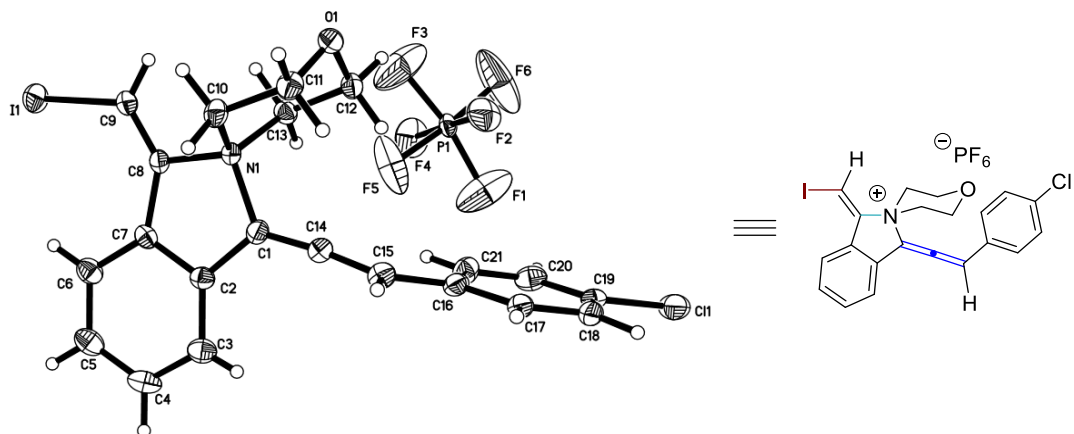

**Figure S5** X-ray crystal structures of **3c**. Displacement ellipsoids are drawn at the 50% probability level. Solvent molecules are omitted for clarity

**Table S2** Crystal data and structure refinement for **3c**

|                                 |                                          |                             |
|---------------------------------|------------------------------------------|-----------------------------|
| Identification code             | cjf21                                    |                             |
| Empirical formula               | $C_{21}H_{18}NOCl \cdot PF_6$            |                             |
| Formula weight                  | 607.68                                   |                             |
| Temperature                     | 294(2) K                                 |                             |
| Wavelength                      | 0.71073 Å                                |                             |
| Crystal system                  | Monoclinic                               |                             |
| Space group                     | P2(1)/n                                  |                             |
| Unit cell dimensions            | $a = 10.0081(9)$ Å                       | $\alpha = 90^\circ$ .       |
|                                 | $b = 12.9824(11)$ Å                      | $\beta = 93.944(3)^\circ$ . |
|                                 | $c = 17.1316(16)$ Å                      | $\gamma = 90^\circ$ .       |
| Volume                          | $2220.6(3)$ Å <sup>3</sup>               |                             |
| Z                               | 4                                        |                             |
| Density (calculated)            | 1.818 Mg/m <sup>3</sup>                  |                             |
| Absorption coefficient          | 1.699 mm <sup>-1</sup>                   |                             |
| F(000)                          | 1192                                     |                             |
| Crystal size                    | 0.16 x 0.12 x 0.08 mm <sup>3</sup>       |                             |
| Theta range for data collection | 2.29 to 27.53°.                          |                             |
| Index ranges                    | -12 ≤ h ≤ 13, -16 ≤ k ≤ 16, -22 ≤ l ≤ 22 |                             |
| Reflections collected           | 64193                                    |                             |
| Independent reflections         | 5096 [R(int) = 0.0399]                   |                             |
| Completeness to theta = 27.53°  | 99.7 %                                   |                             |
| Absorption correction           | Semi-empirical from equivalents          |                             |
| Max. and min. transmission      | 0.7456 and 0.6764                        |                             |

|                                      |                                       |
|--------------------------------------|---------------------------------------|
| Refinement method                    | Full-matrix least-squares on $F^2$    |
| Data / restraints / parameters       | 5096 / 15 / 312                       |
| Goodness-of-fit on $F^2$             | 1.000                                 |
| Final R indices [ $I > 2\sigma(I)$ ] | R1 = 0.0622, wR2 = 0.1739             |
| R indices (all data)                 | R1 = 0.0799, wR2 = 0.1851             |
| Extinction coefficient               | 0.0006(3)                             |
| Largest diff. peak and hole          | 1.010 and -0.928 e. $\text{\AA}^{-3}$ |

**Table S3** Atomic coordinates ( $\times 10^4$ ) and equivalent isotropic displacement parameters ( $\text{\AA}^2 \times 10^3$ ) for CJF21.  $U(\text{eq})$  is defined as one third of the trace of the orthogonalized  $U^{ij}$  tensor.

|       | x        | y       | z       | $U(\text{eq})$ |
|-------|----------|---------|---------|----------------|
| I(1)  | 13029(1) | 5607(1) | 666(1)  | 71(1)          |
| Cl(1) | 1962(1)  | 1244(1) | 1784(1) | 87(1)          |
| O(1)  | 9809(3)  | 2825(2) | 3008(2) | 59(1)          |
| N(1)  | 9576(3)  | 4521(2) | 1932(2) | 39(1)          |
| C(1)  | 8185(4)  | 4997(3) | 1841(2) | 47(1)          |
| C(2)  | 8247(4)  | 5855(3) | 1303(2) | 45(1)          |
| C(3)  | 7248(5)  | 6514(4) | 1060(3) | 59(1)          |
| C(4)  | 7534(6)  | 7304(4) | 561(3)  | 67(1)          |
| C(5)  | 8810(6)  | 7434(4) | 317(3)  | 69(1)          |
| C(6)  | 9808(5)  | 6767(4) | 546(3)  | 58(1)          |
| C(7)  | 9542(4)  | 5958(3) | 1051(2) | 45(1)          |
| C(8)  | 10409(4) | 5160(3) | 1394(2) | 43(1)          |
| C(9)  | 11664(4) | 4889(3) | 1335(3) | 51(1)          |
| C(10) | 10171(4) | 4613(3) | 2770(2) | 50(1)          |
| C(11) | 9620(4)  | 3828(4) | 3299(2) | 55(1)          |
| C(12) | 9040(4)  | 2695(3) | 2286(3) | 54(1)          |
| C(13) | 9542(4)  | 3400(3) | 1670(2) | 48(1)          |
| C(14) | 7174(4)  | 4664(3) | 2203(3) | 53(1)          |
| C(15) | 6124(5)  | 4440(4) | 2590(3) | 59(1)          |
| C(16) | 5104(4)  | 3666(4) | 2365(3) | 51(1)          |
| C(17) | 4123(4)  | 3447(3) | 2867(3) | 52(1)          |
| C(18) | 3153(4)  | 2712(4) | 2701(3) | 54(1)          |
| C(19) | 3163(4)  | 2172(3) | 2016(3) | 56(1)          |
| C(20) | 4143(5)  | 2380(4) | 1490(3) | 66(1)          |
| C(21) | 5096(5)  | 3104(4) | 1676(3) | 61(1)          |
| P(1)  | 7373(1)  | 1028(1) | 354(1)  | 45(1)          |
| F(1)  | 5884(5)  | 1252(7) | 150(3)  | 197(3)         |
| F(2)  | 7047(4)  | 977(3)  | 1255(2) | 104(1)         |
| F(3)  | 8893(5)  | 1051(9) | 598(4)  | 231(4)         |
| F(4)  | 7701(5)  | 1156(4) | -530(2) | 122(2)         |
| F(5)  | 7533(8)  | 2223(4) | 485(3)  | 189(3)         |
| F(6)  | 7370(10) | -138(4) | 301(4)  | 271(4)         |

# <sup>1</sup>H NMR

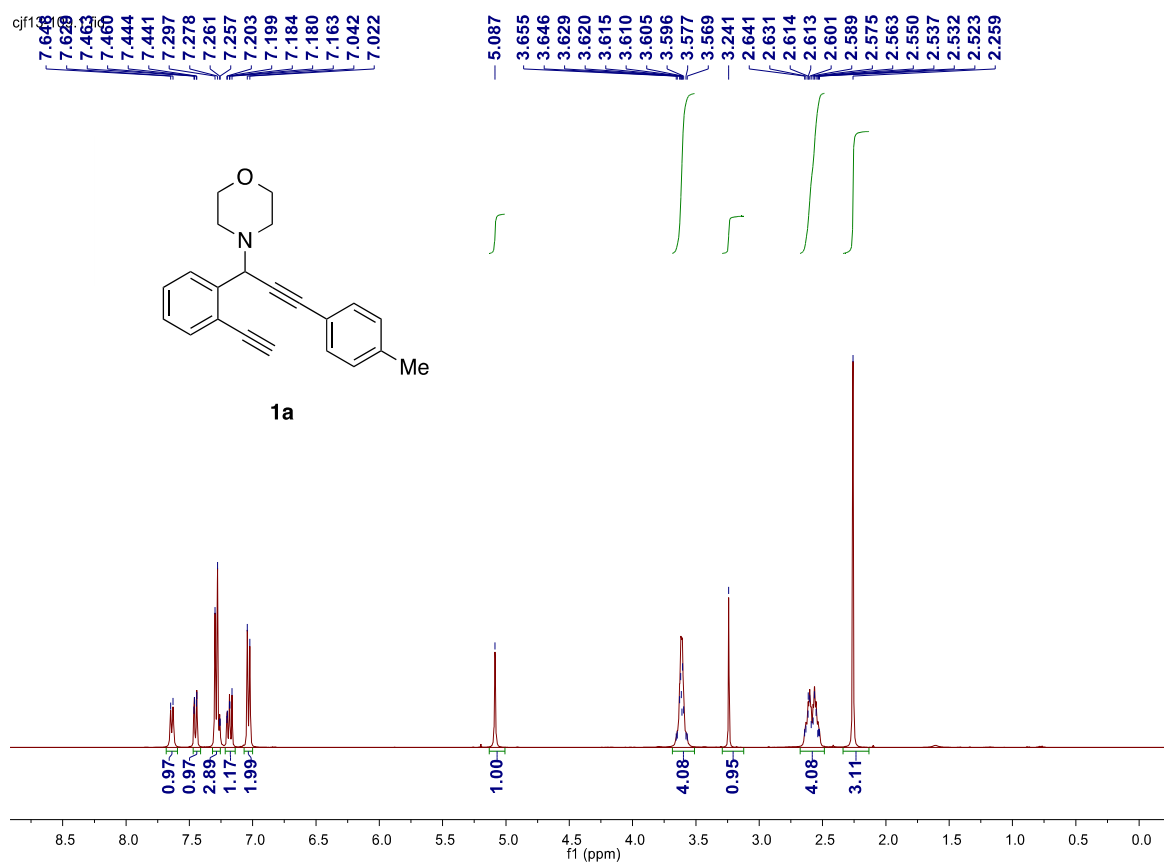

# <sup>13</sup>C NMR

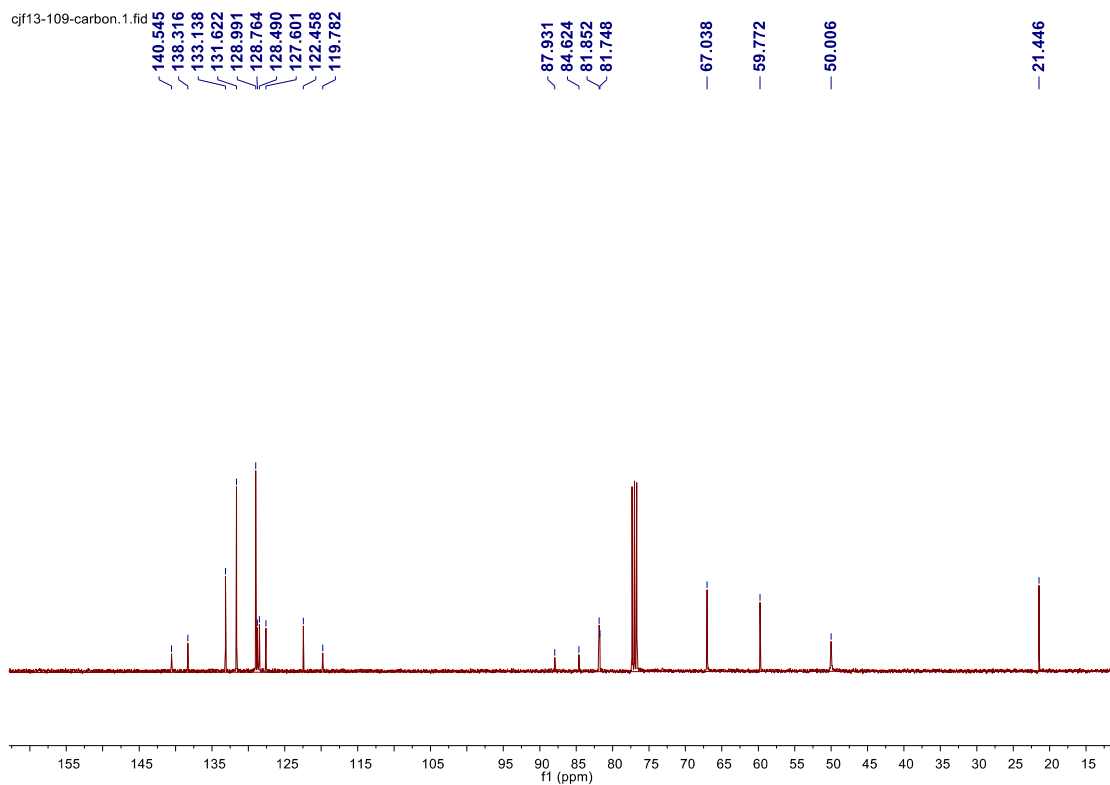

# $^1\text{H}$ NMR

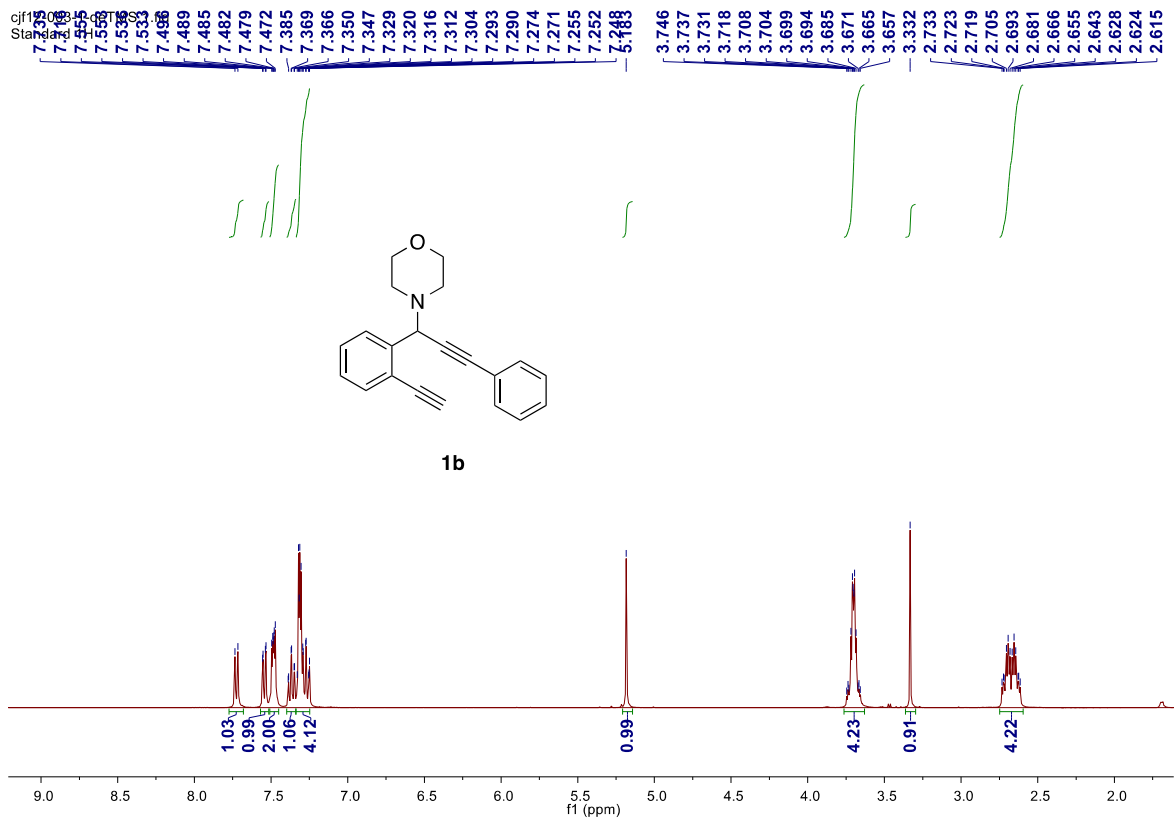

# $^{13}\text{C}$ NMR

Standard 13C

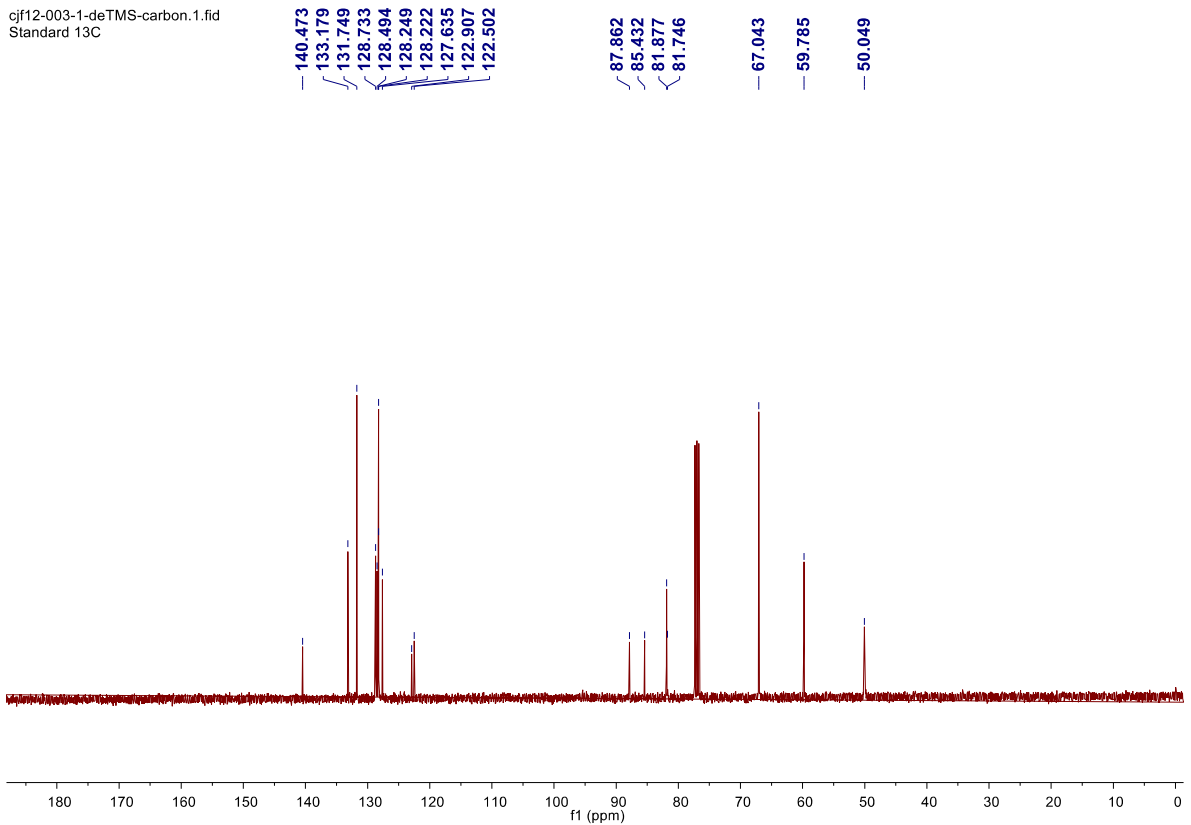

# <sup>1</sup>H NMR

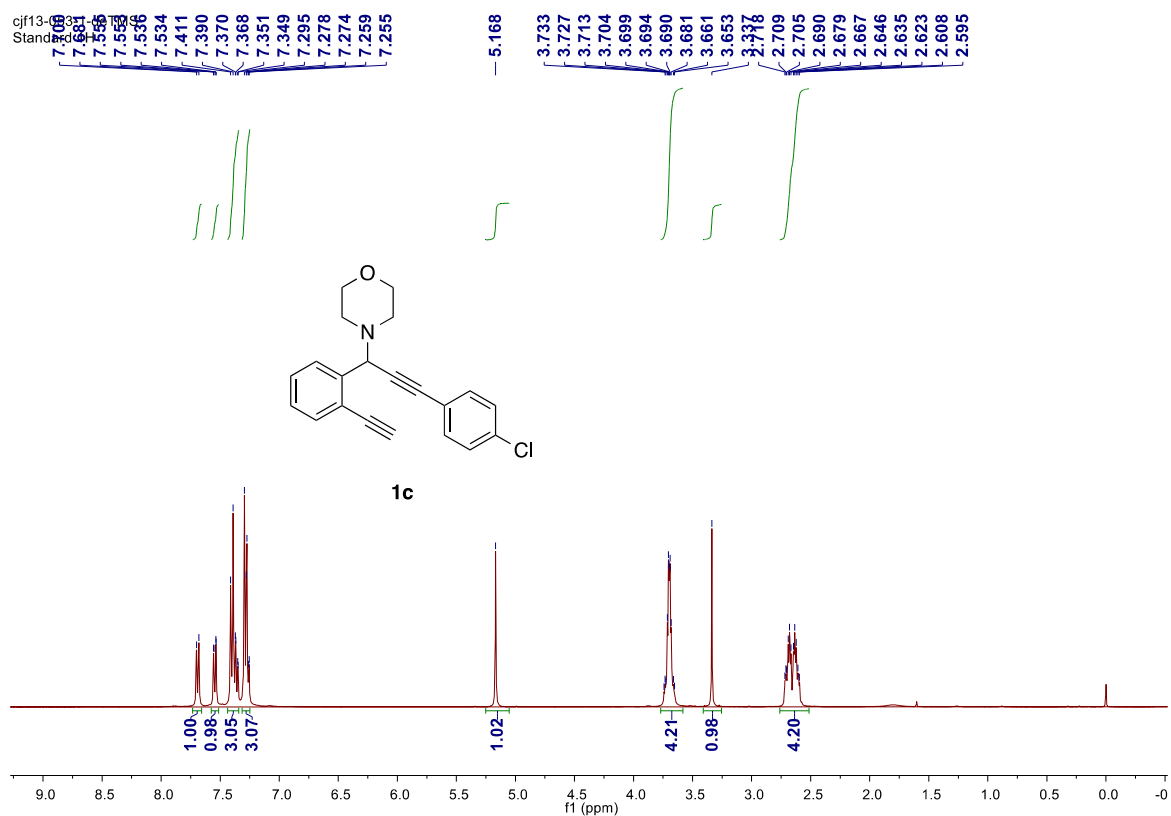

# <sup>13</sup>C NMR

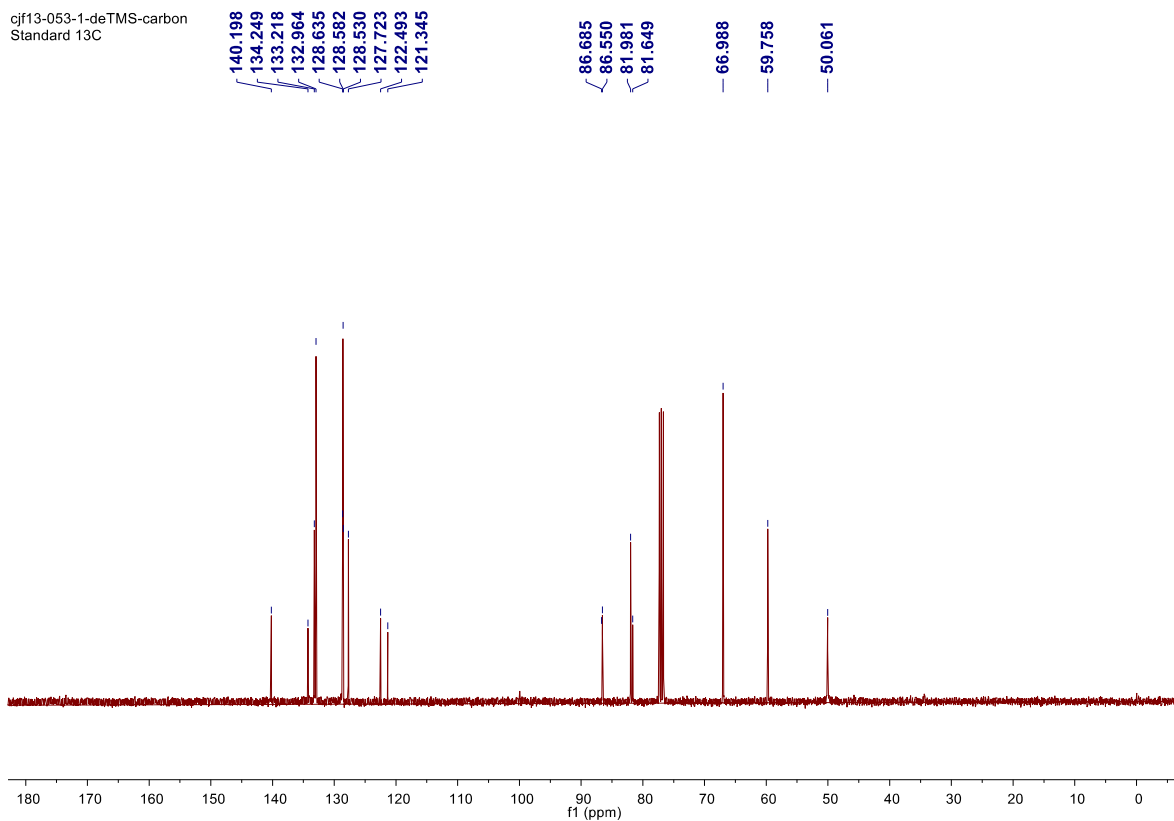

# <sup>1</sup>H NMR

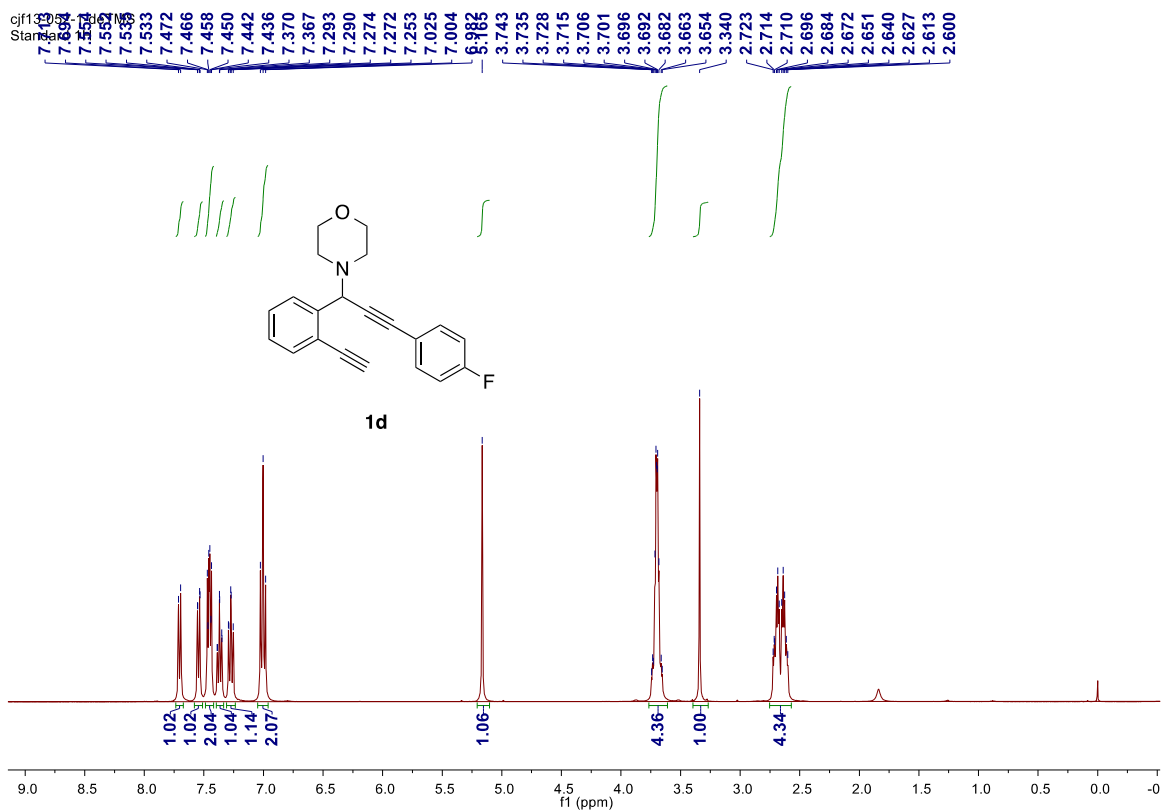

# <sup>13</sup>C NMR

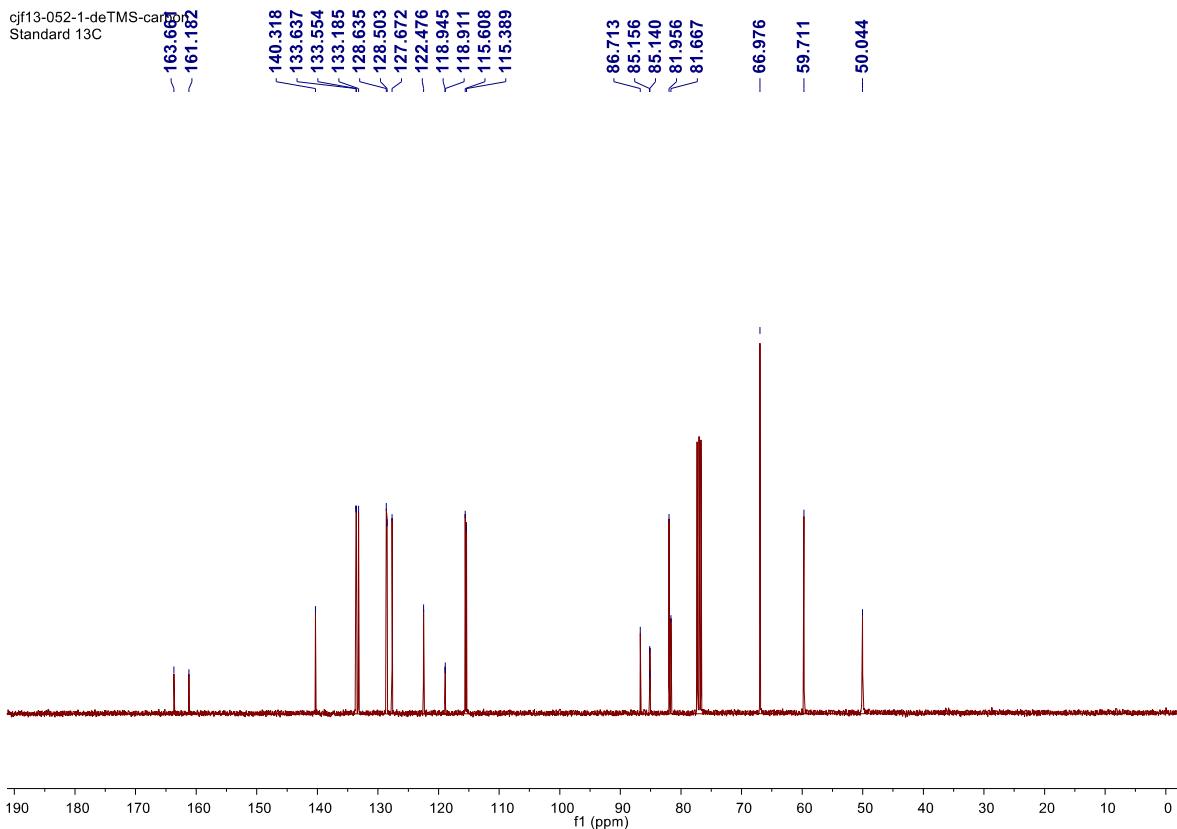

# <sup>1</sup>H NMR

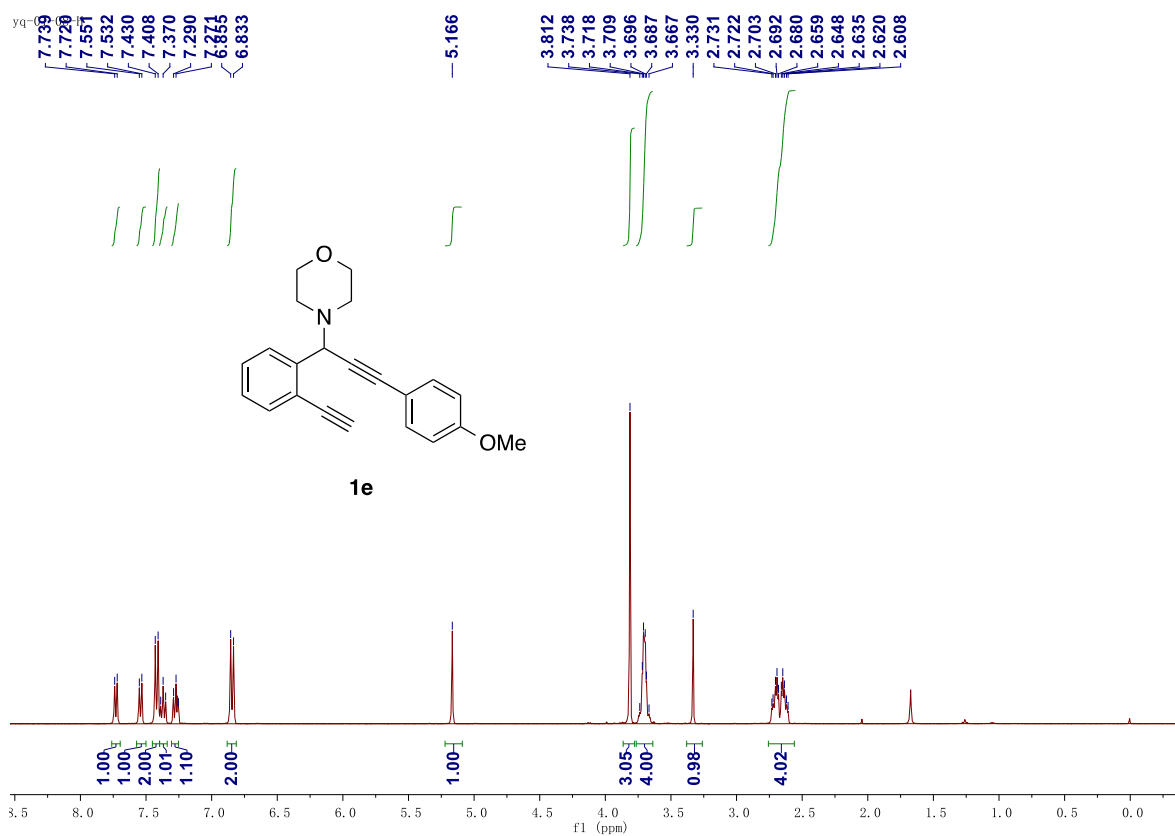

# <sup>13</sup>C NMR

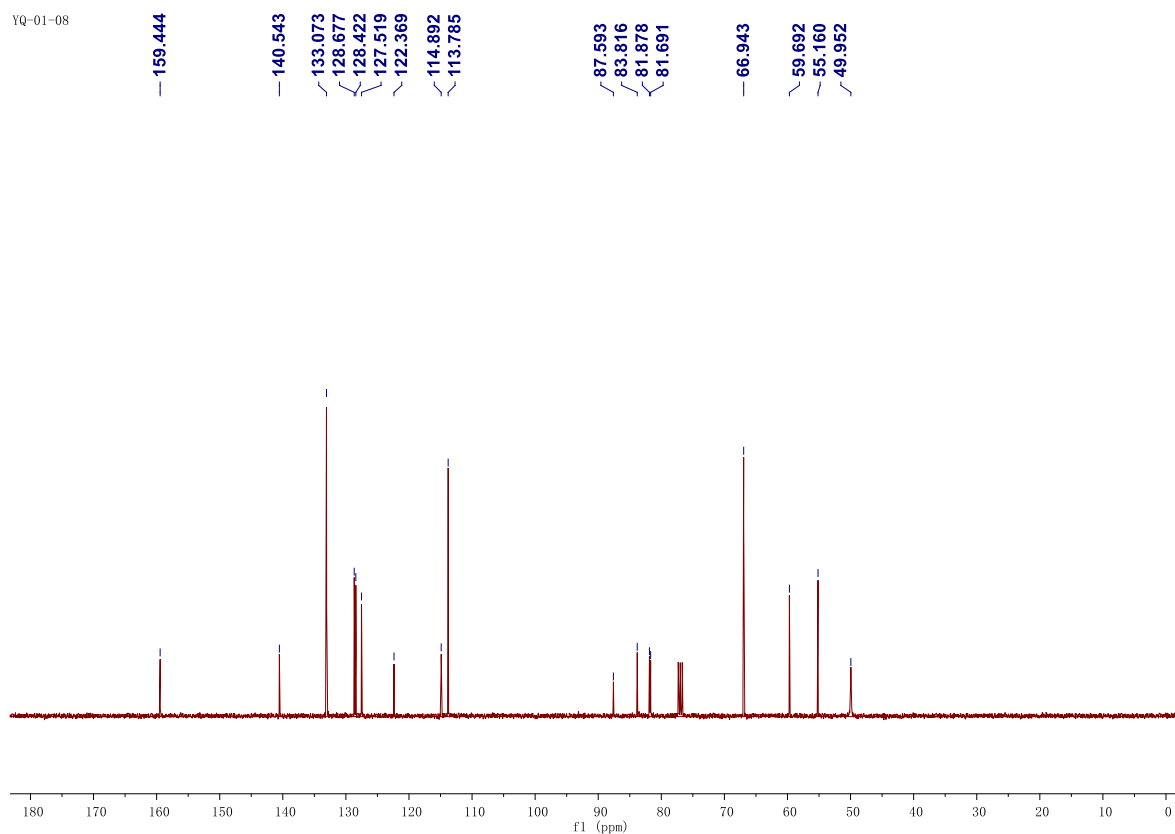



# <sup>1</sup>H NMR

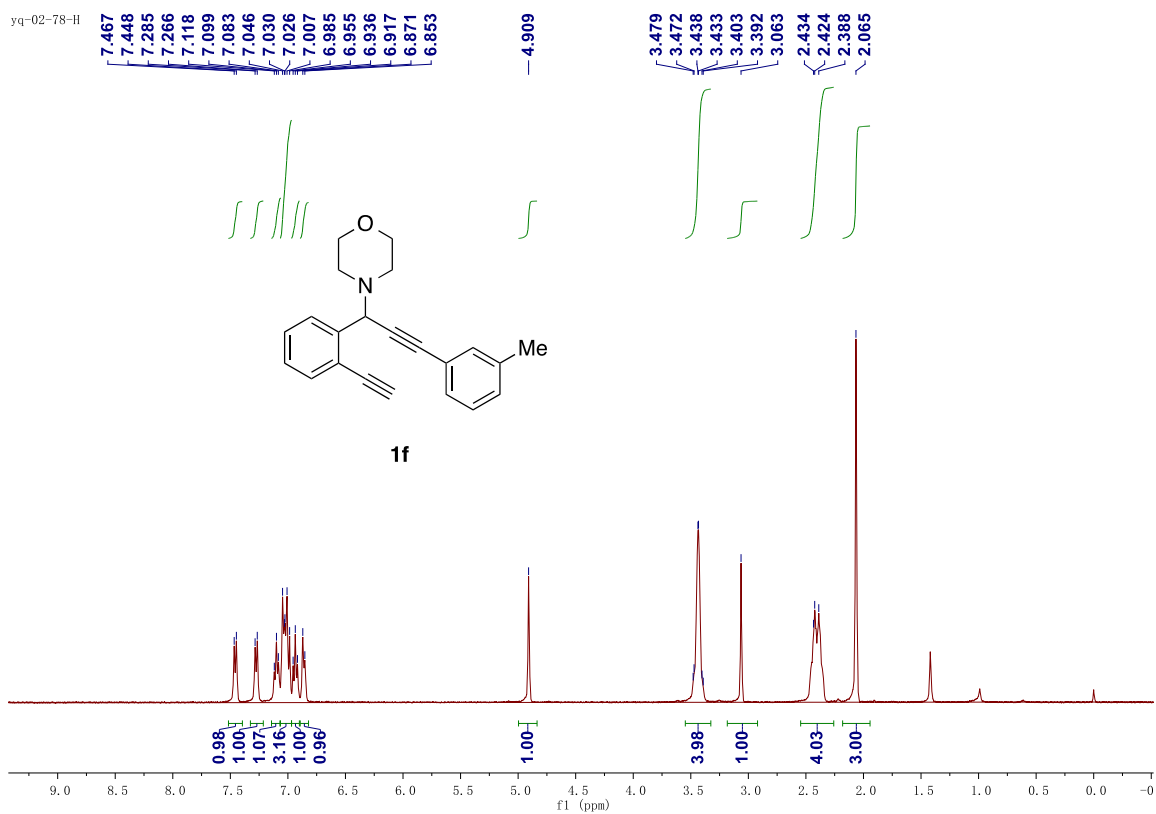

# <sup>13</sup>C NMR

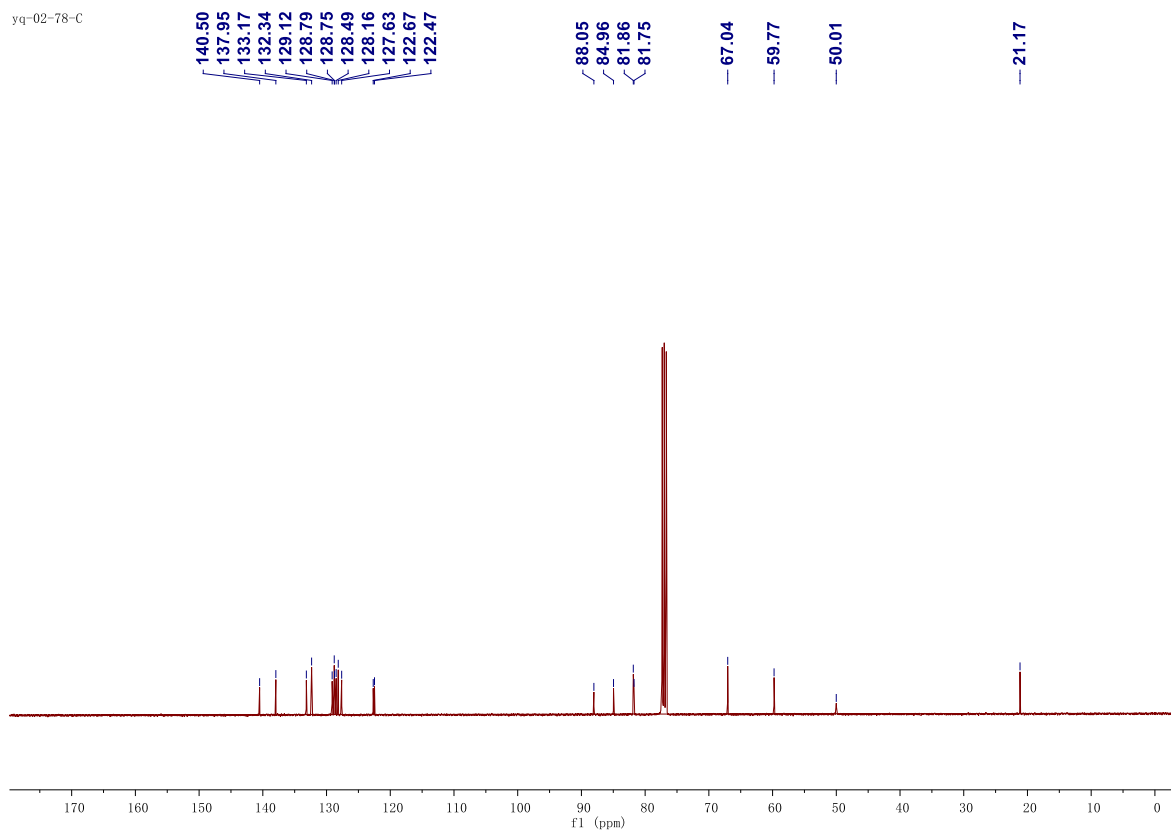

# <sup>1</sup>H NMR

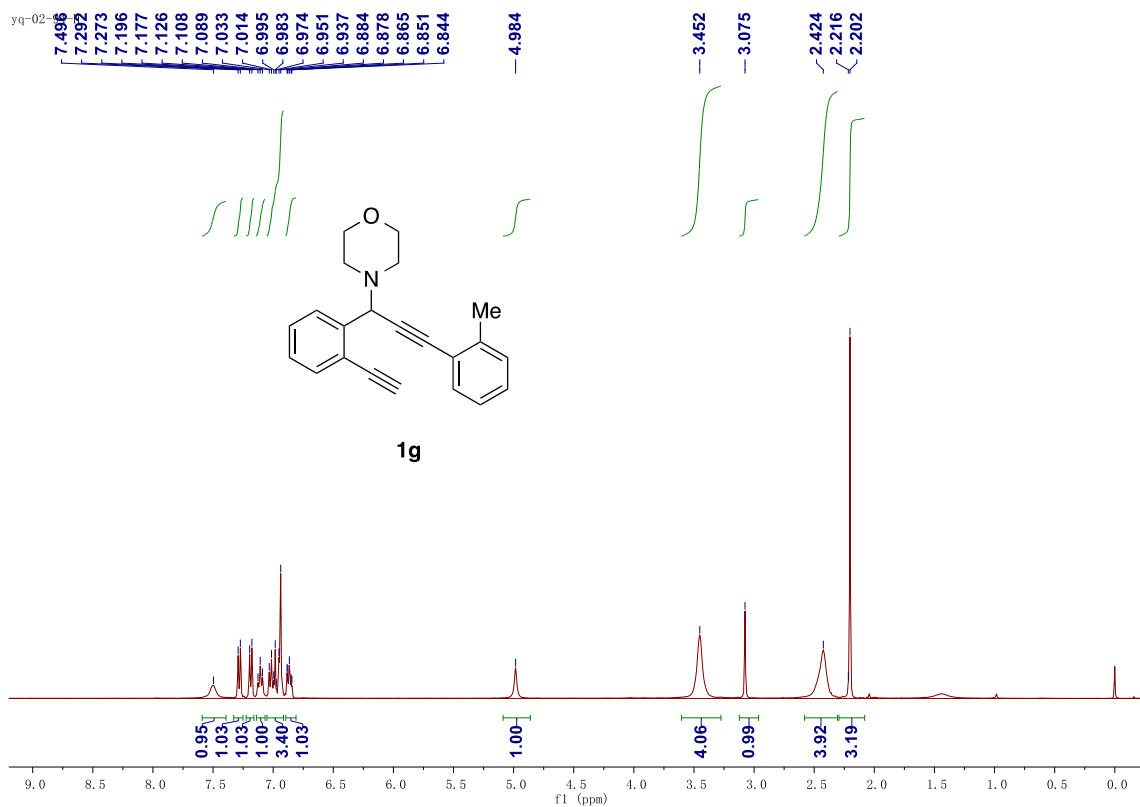

# <sup>13</sup>C NMR

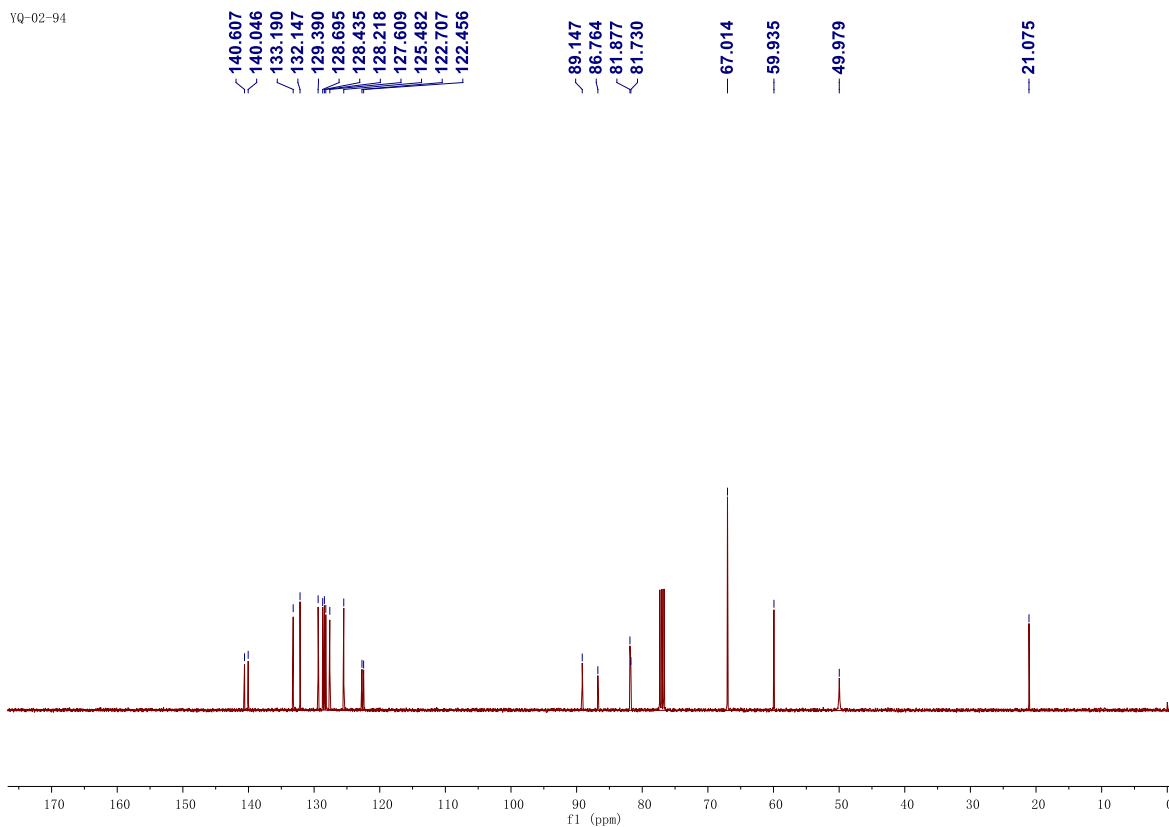

# <sup>1</sup>H NMR

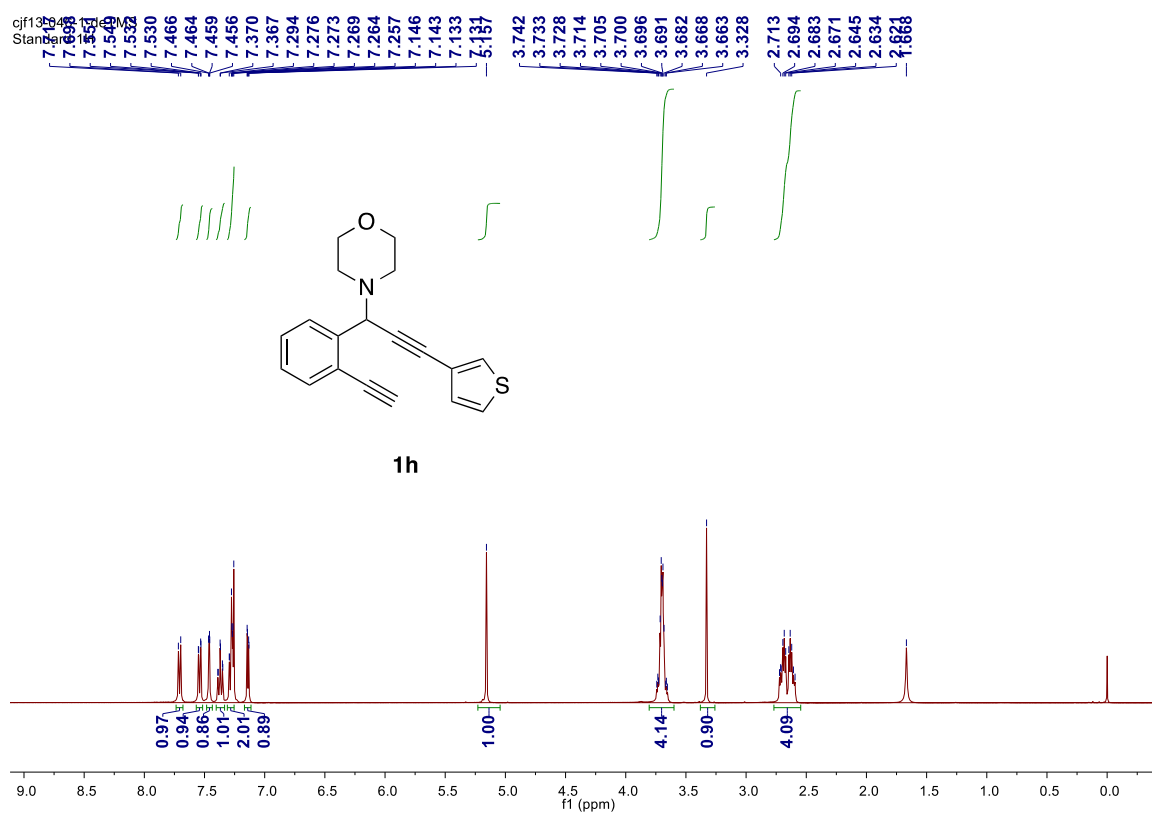

# <sup>13</sup>C NMR

Standard 13C

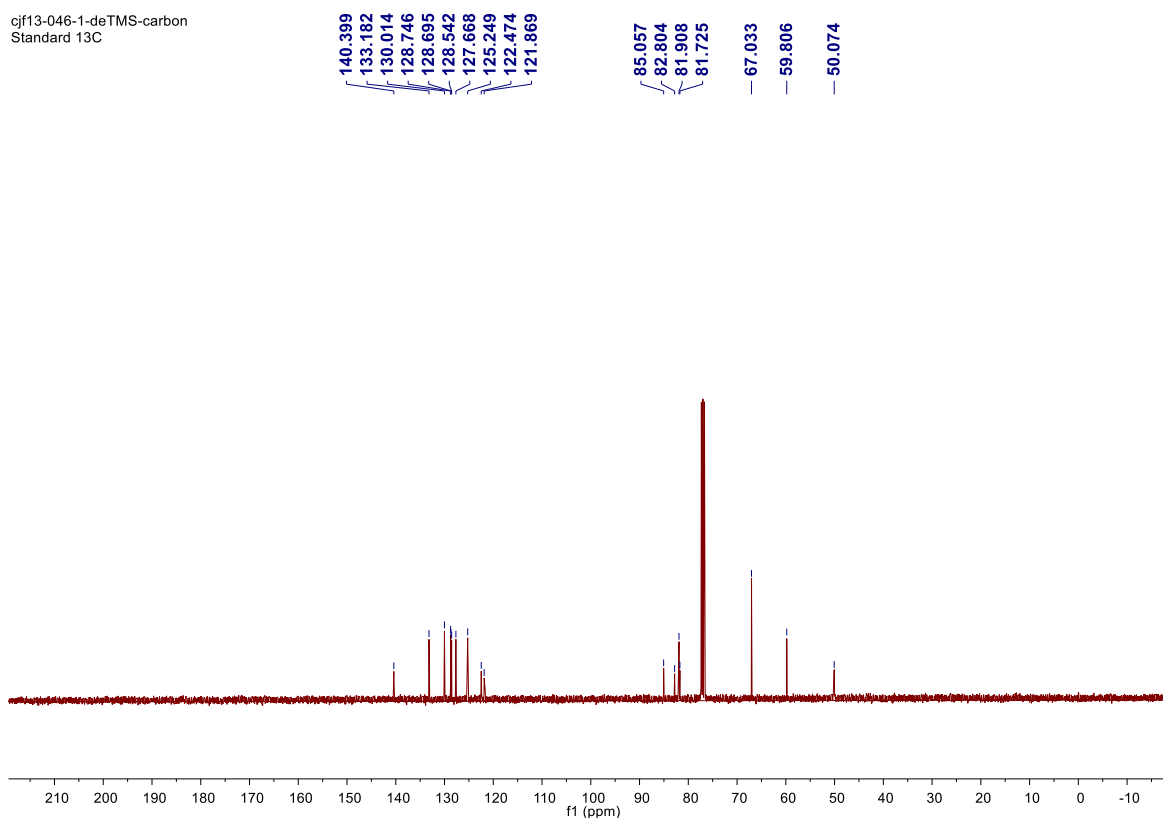

# <sup>1</sup>H NMR

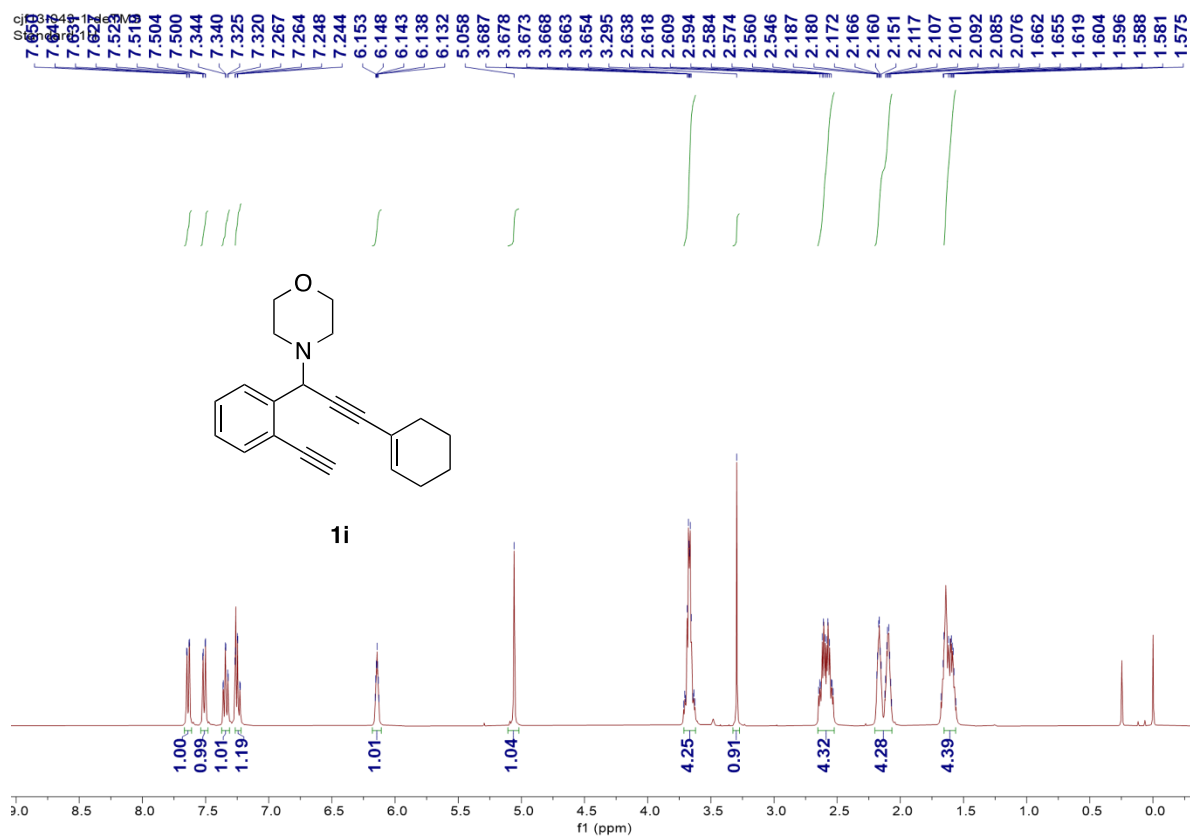

# <sup>13</sup>C NMR

Standard 13C

140.843  
134.790  
133.094  
128.724  
128.431  
127.477  
122.416  
120.370

89.736

82.375  
81.815  
81.711

67.050

59.679

49.935

29.492

25.578

22.285

21.491

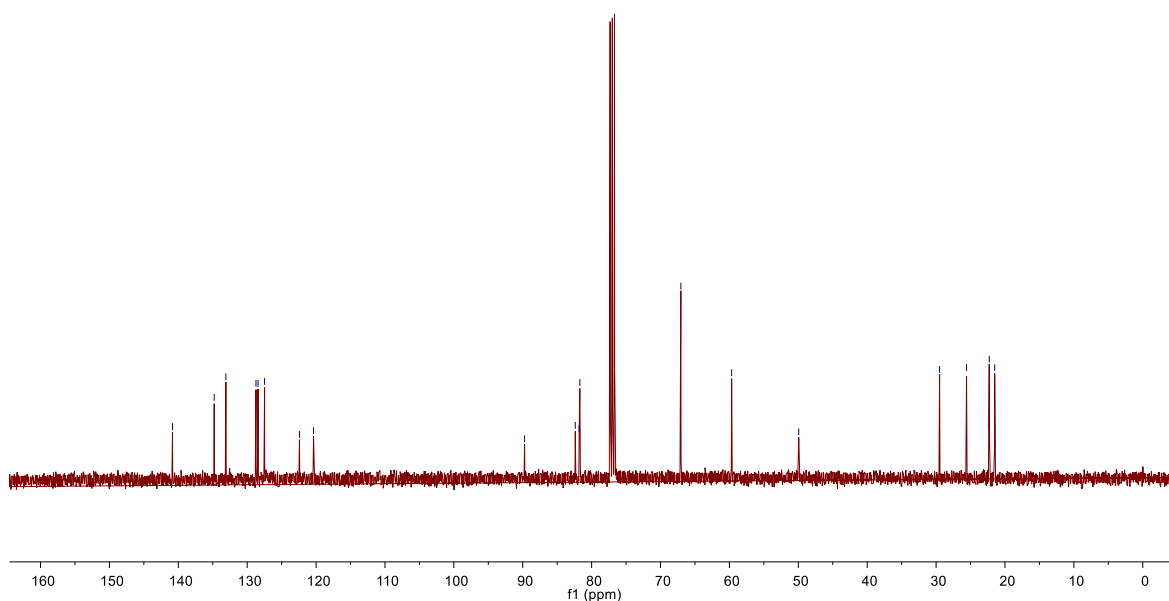

# <sup>1</sup>H NMR

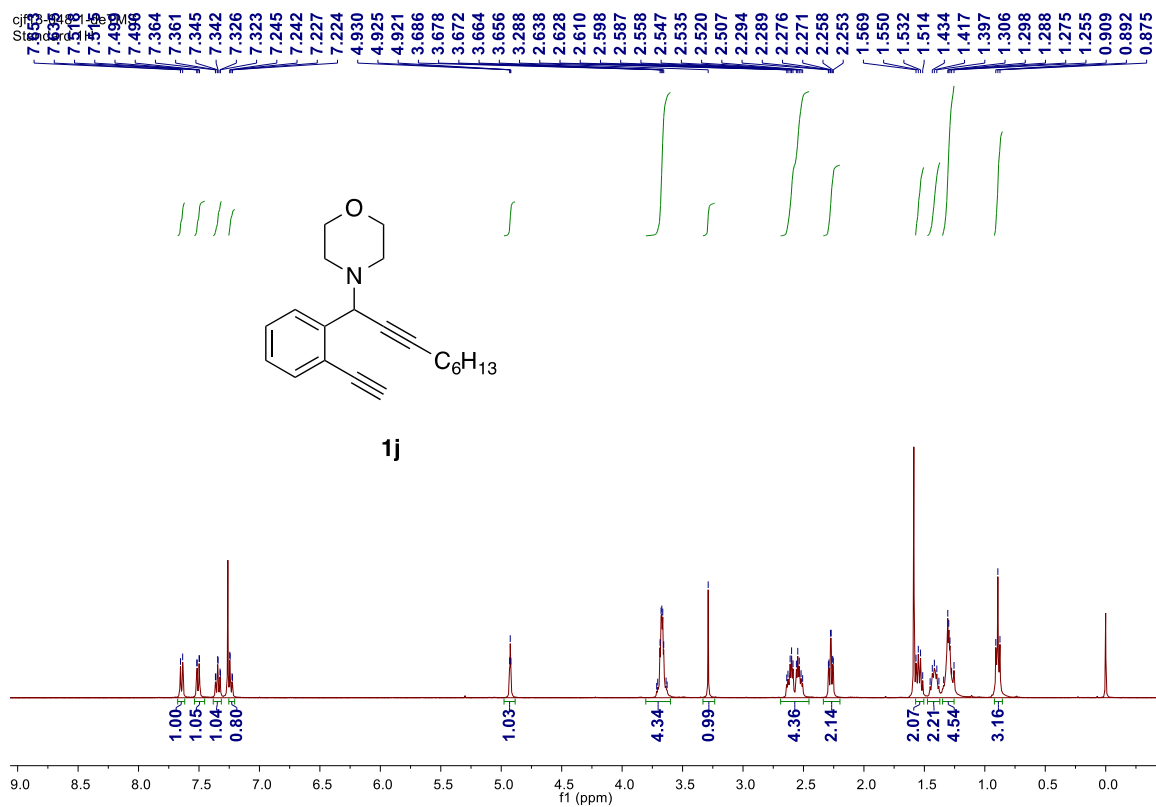

# <sup>13</sup>C NMR

cjf13-048-1-deTMS-carbo  
Standard 13C

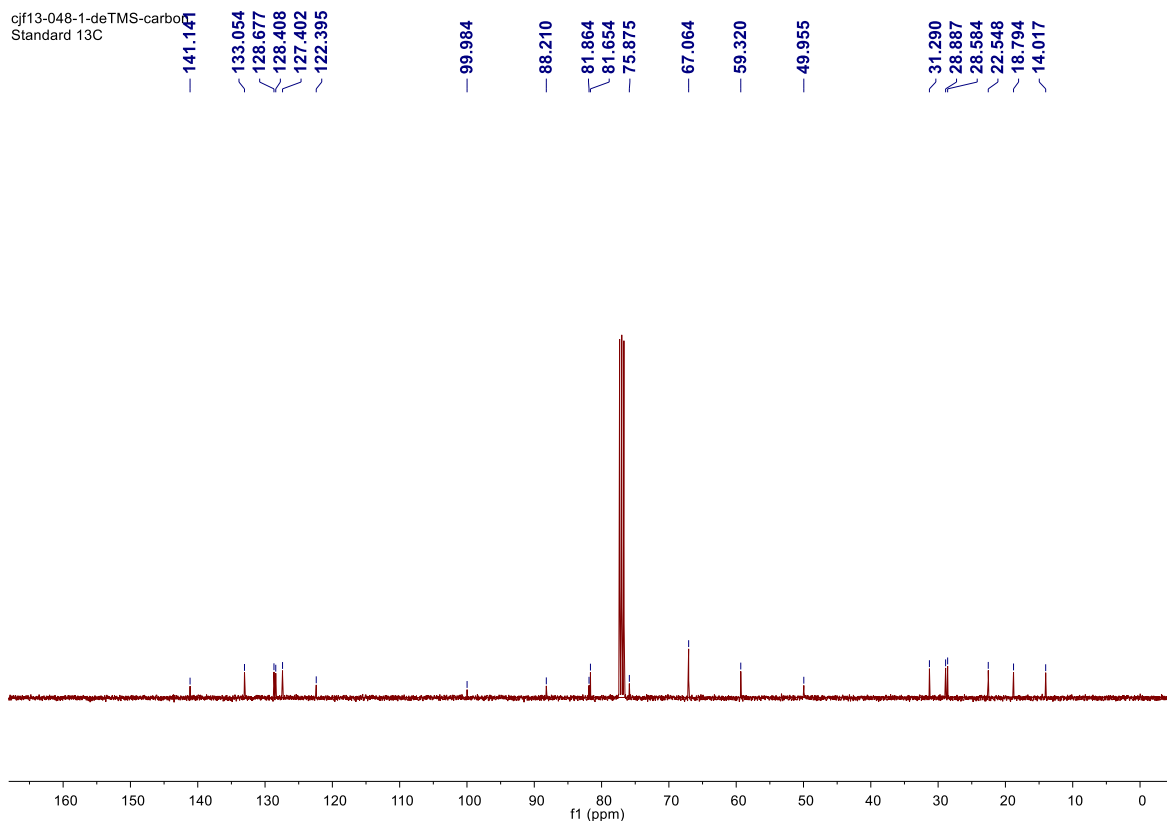

# <sup>1</sup>H NMR

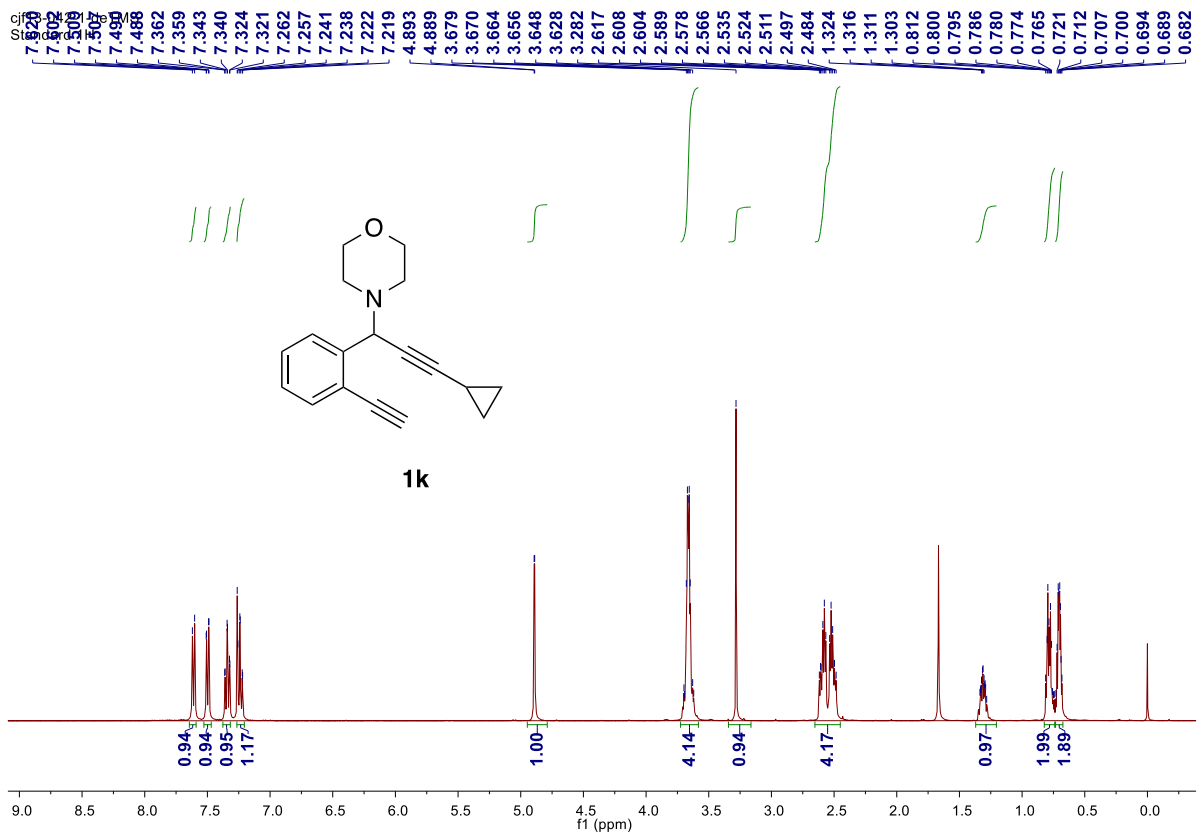

# <sup>13</sup>C NMR

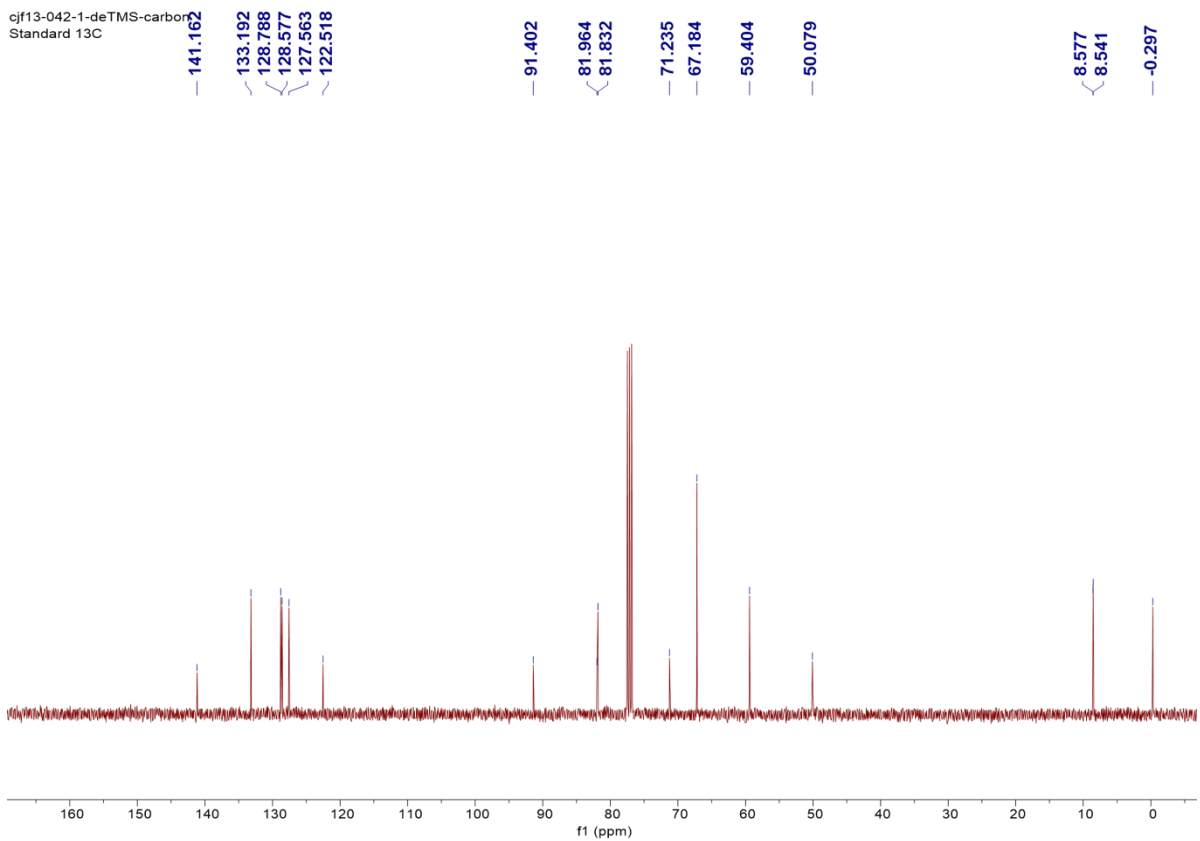

# <sup>1</sup>H NMR

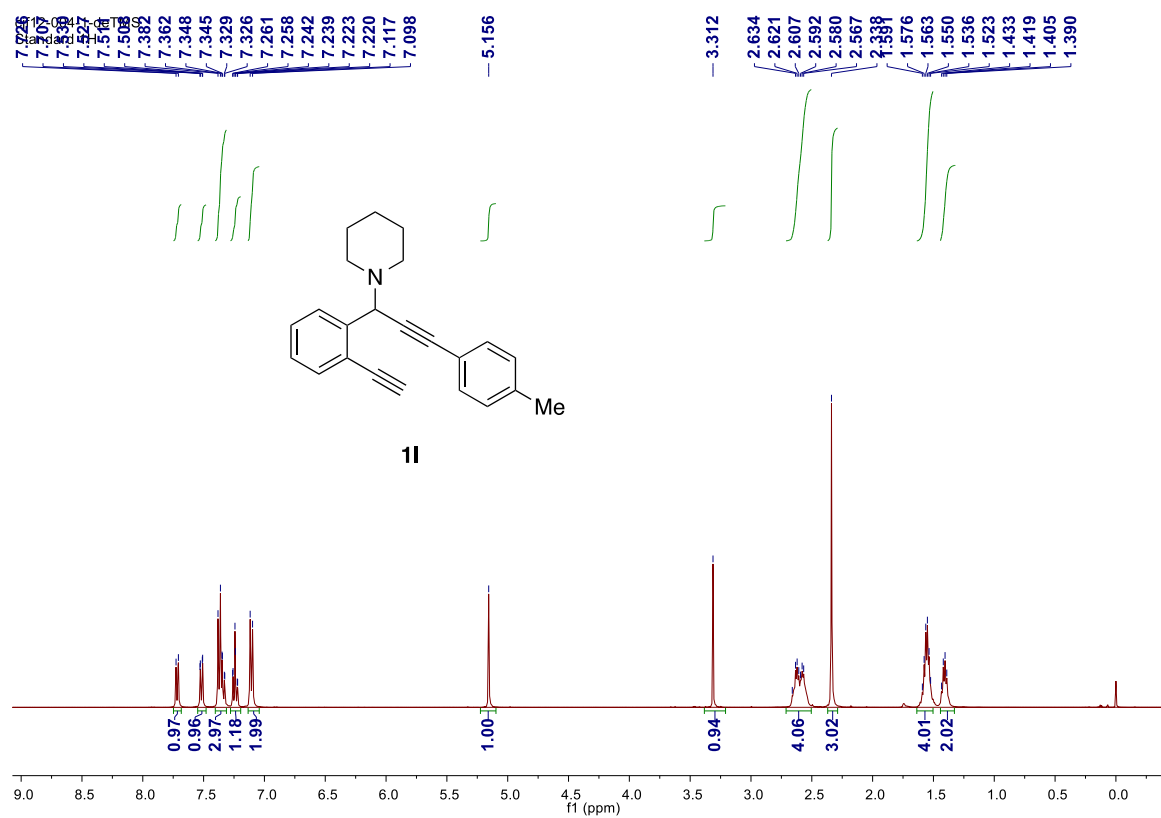

# <sup>13</sup>C NMR

cyj12-004-1-deTMS-carbon  
Standard 13C

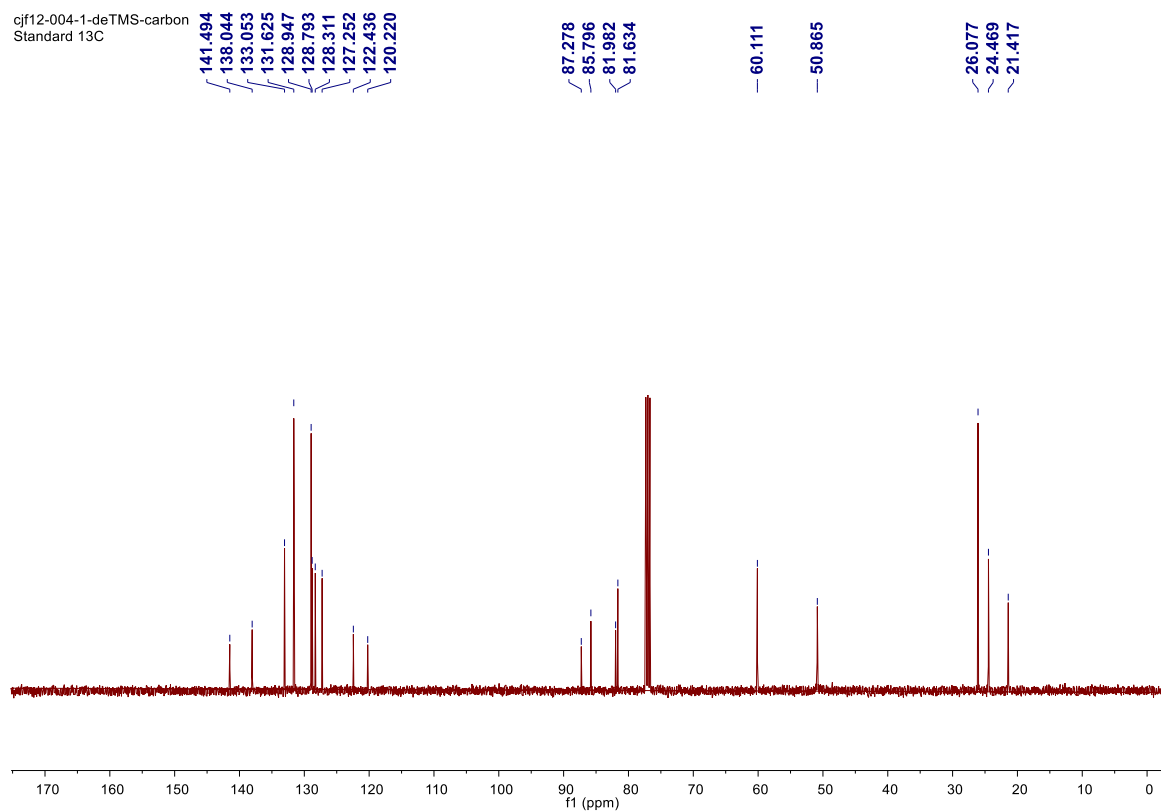

# <sup>1</sup>H NMR

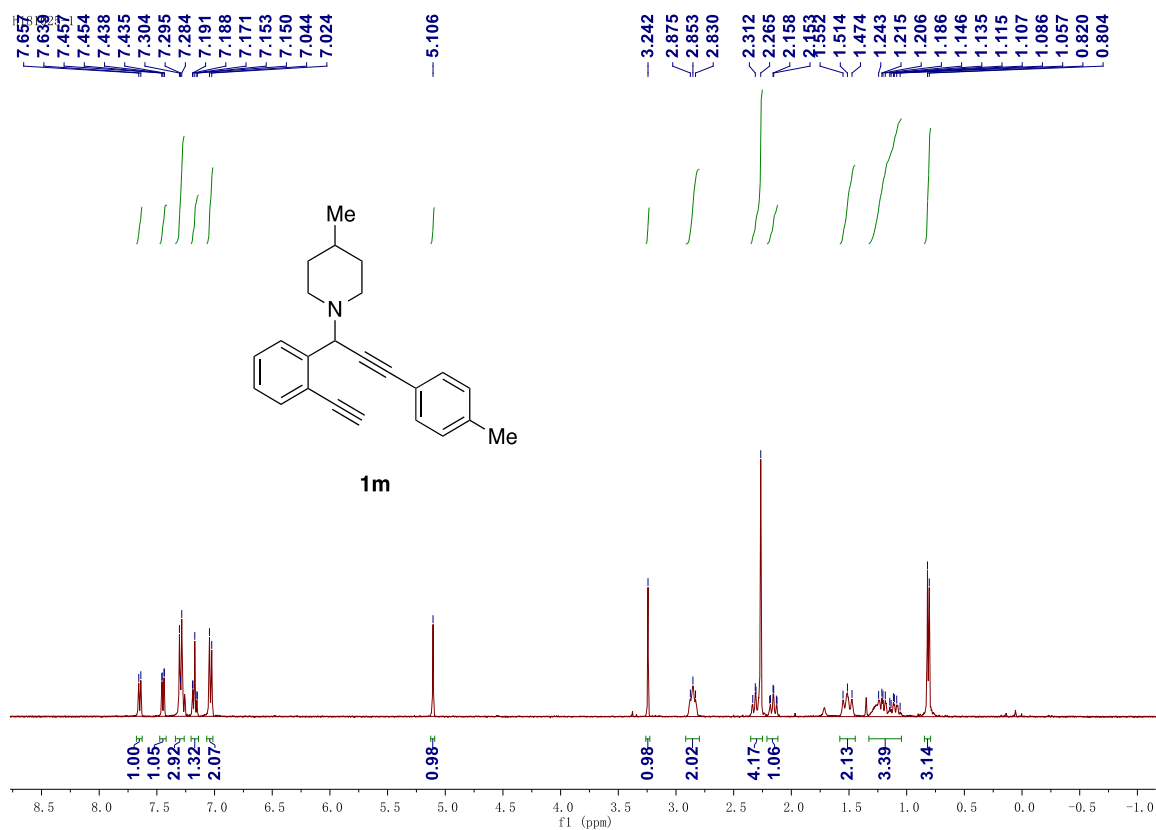

# <sup>13</sup>C NMR

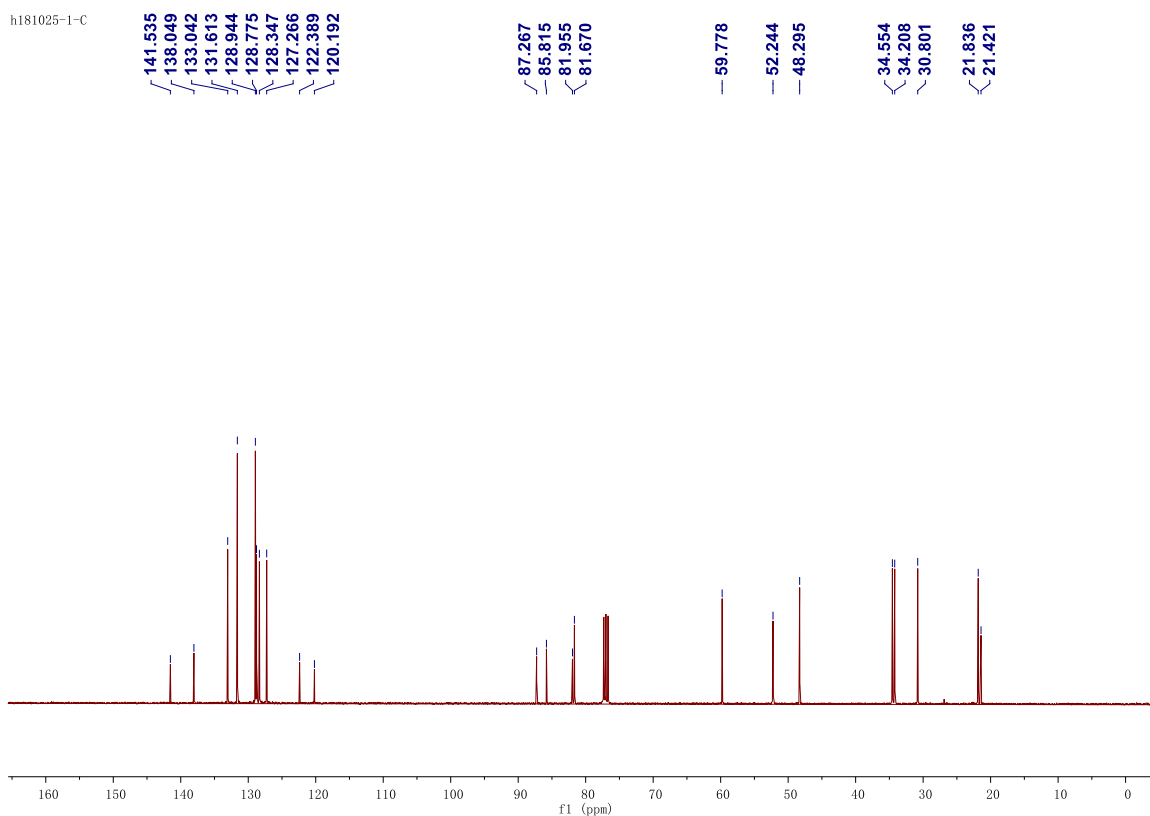



# <sup>1</sup>H NMR

SN133-P1A.1.fid

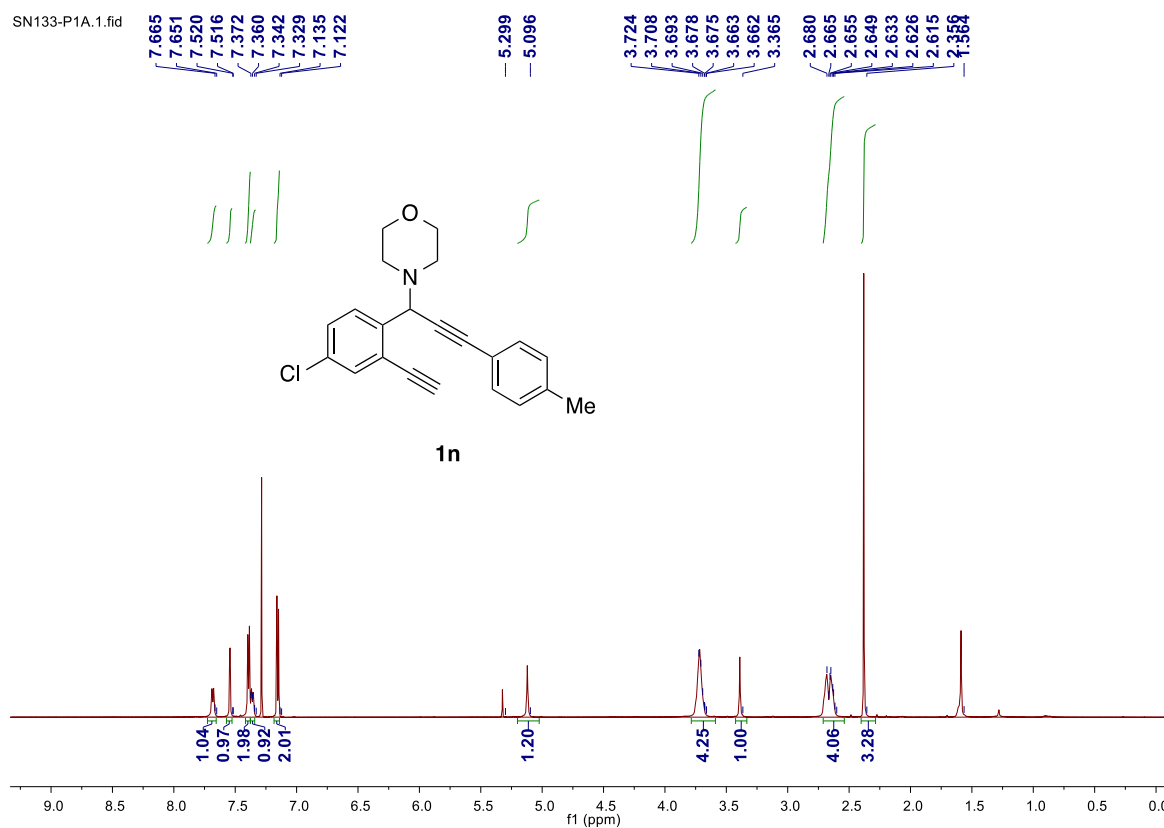

# <sup>13</sup>C NMR

SN133-P1A.13.fid

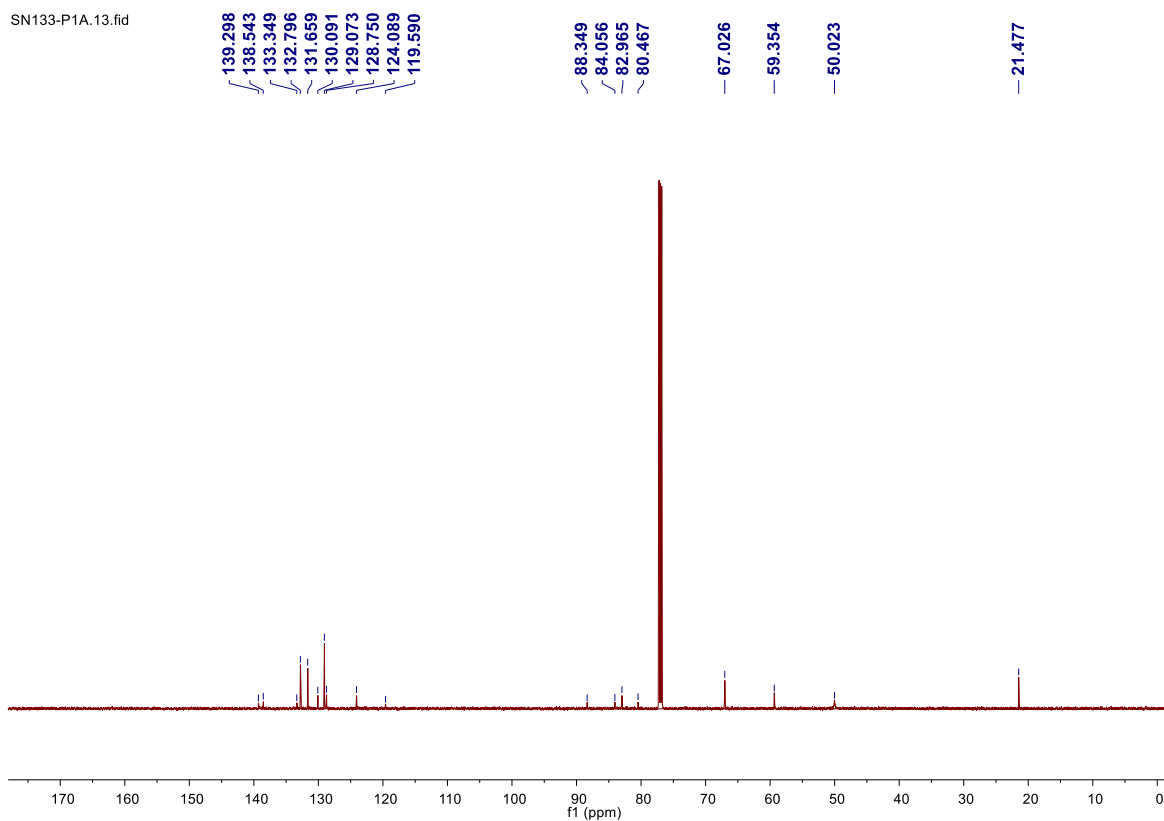

# <sup>1</sup>H NMR

cfj13-056-1-deTM  
Standard 1H

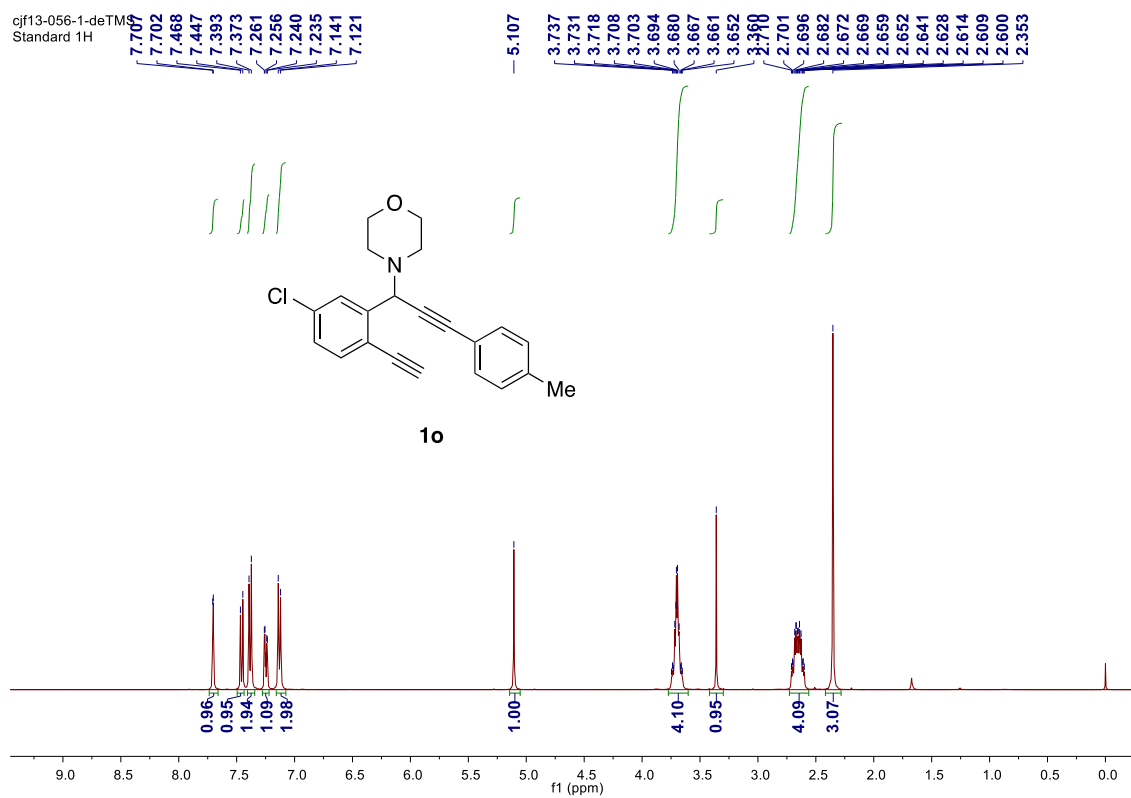

# <sup>13</sup>C NMR

cfj13-056-1-deTMS-carbon  
Standard 13C

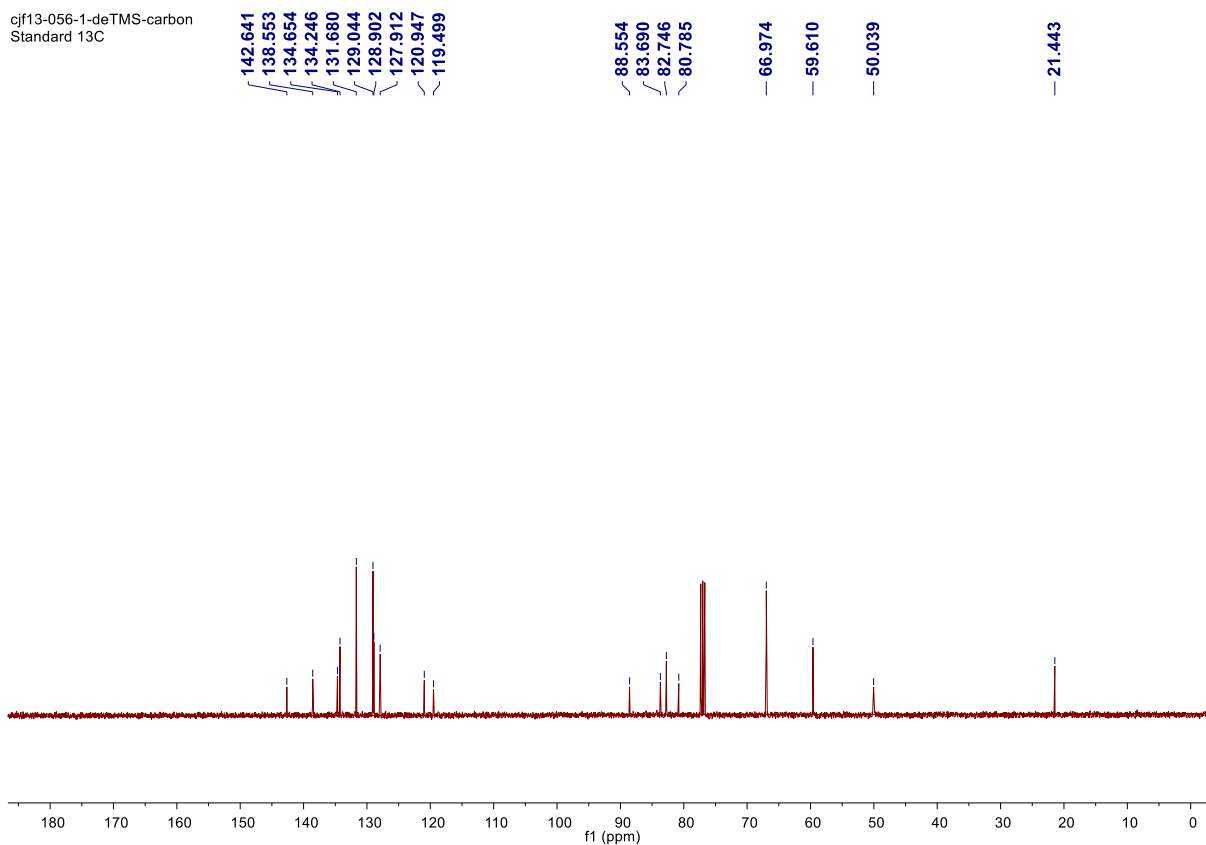

# <sup>1</sup>H NMR

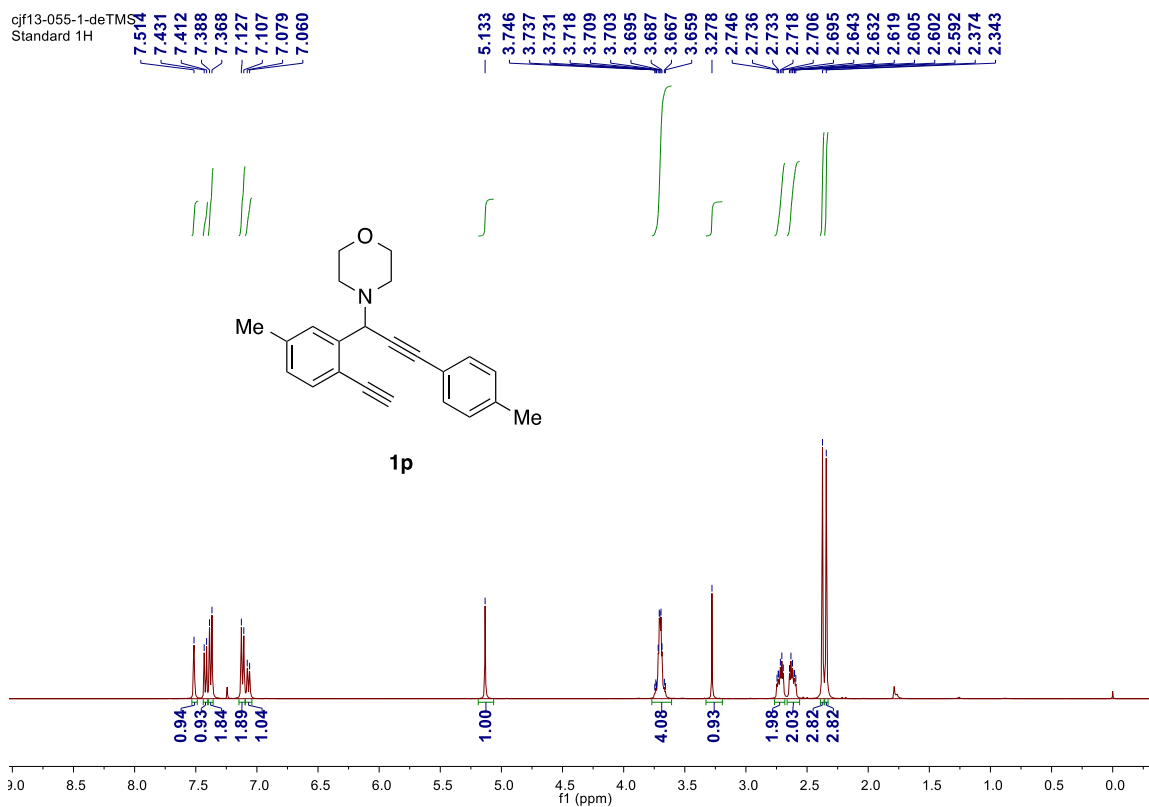

# <sup>13</sup>C NMR

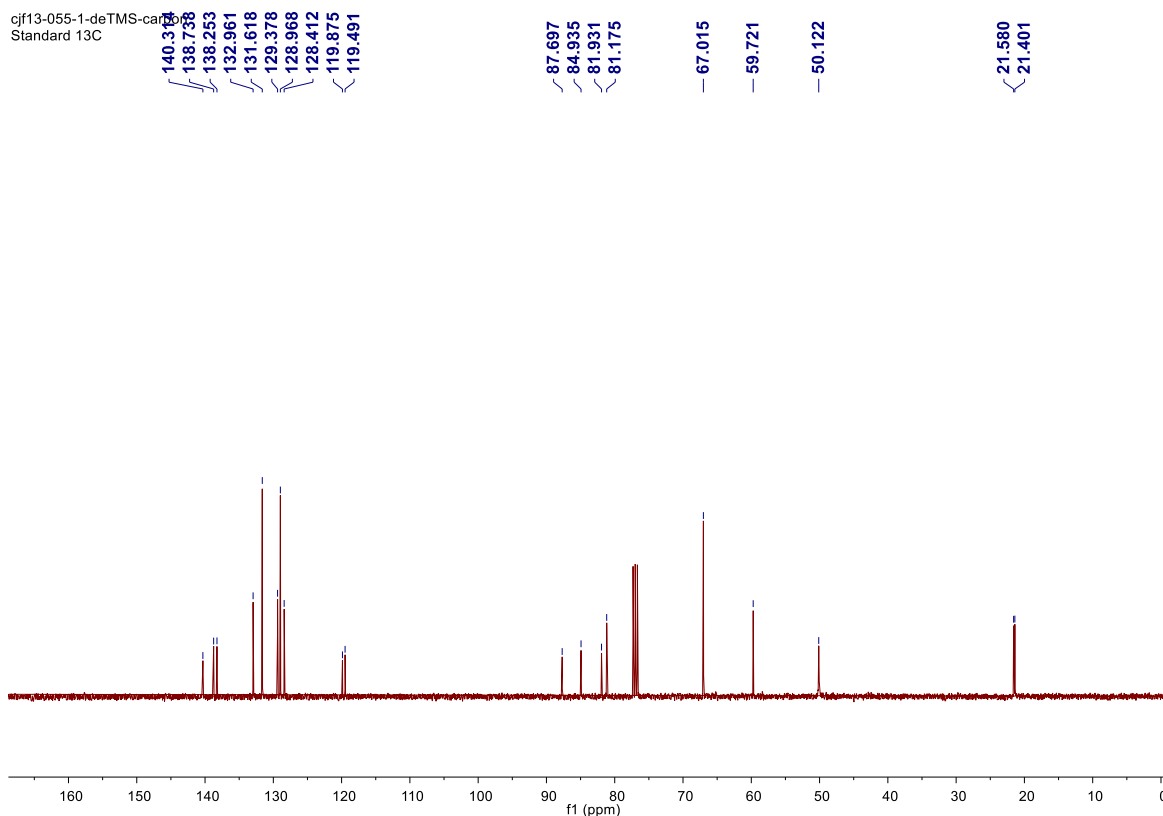

# <sup>1</sup>H NMR

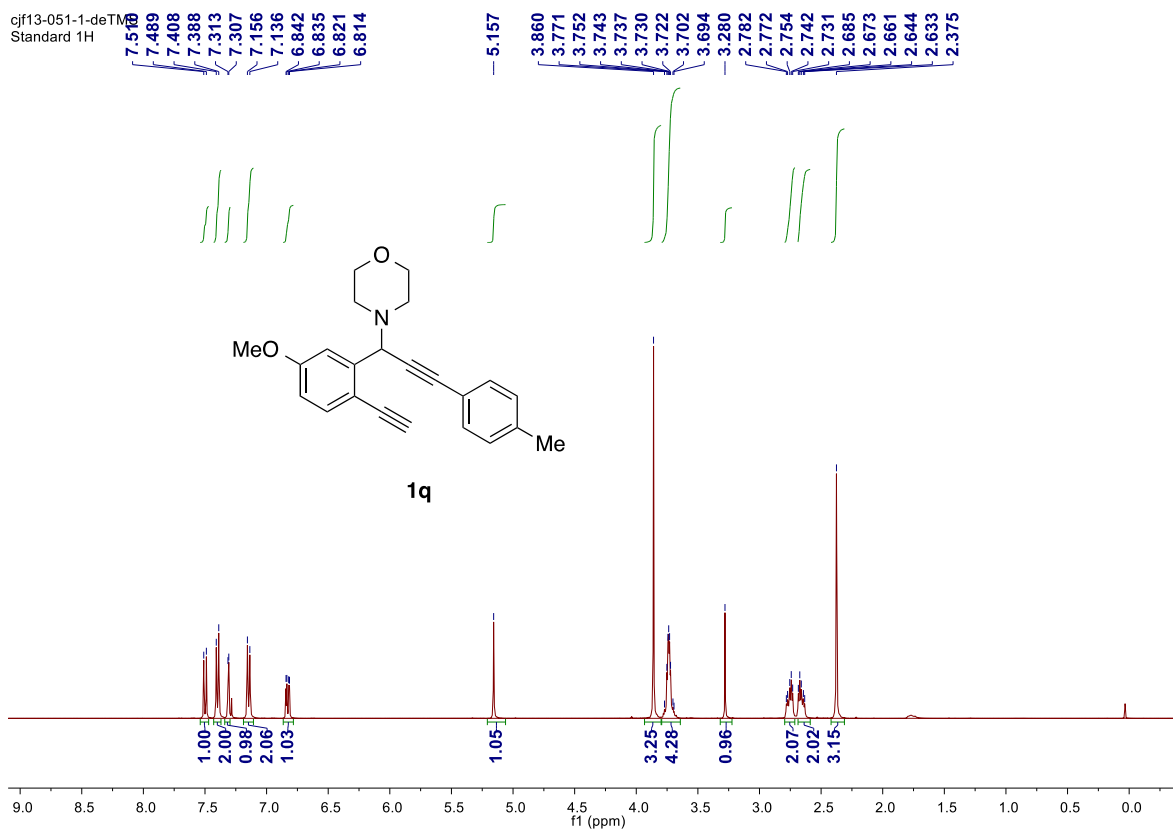

# <sup>13</sup>C NMR

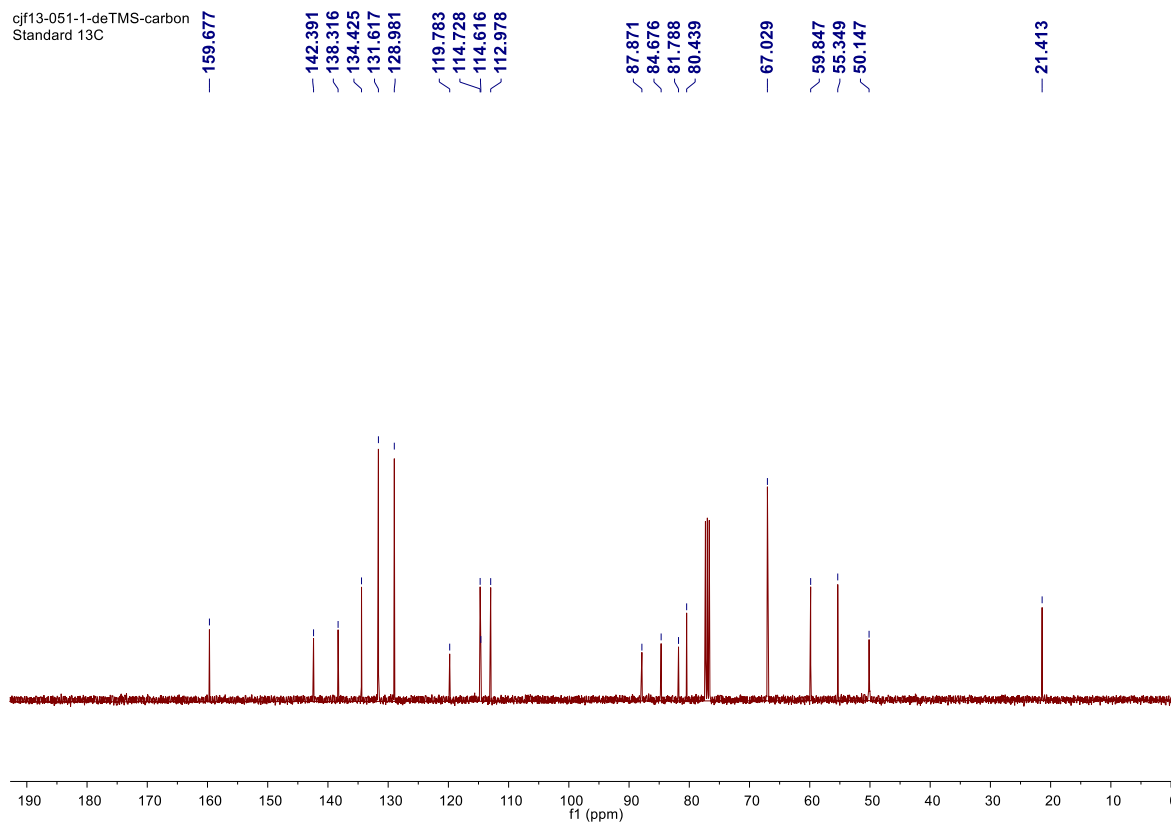

# <sup>1</sup>H NMR

cfj13-058-1-deTMS  
Standard 1H

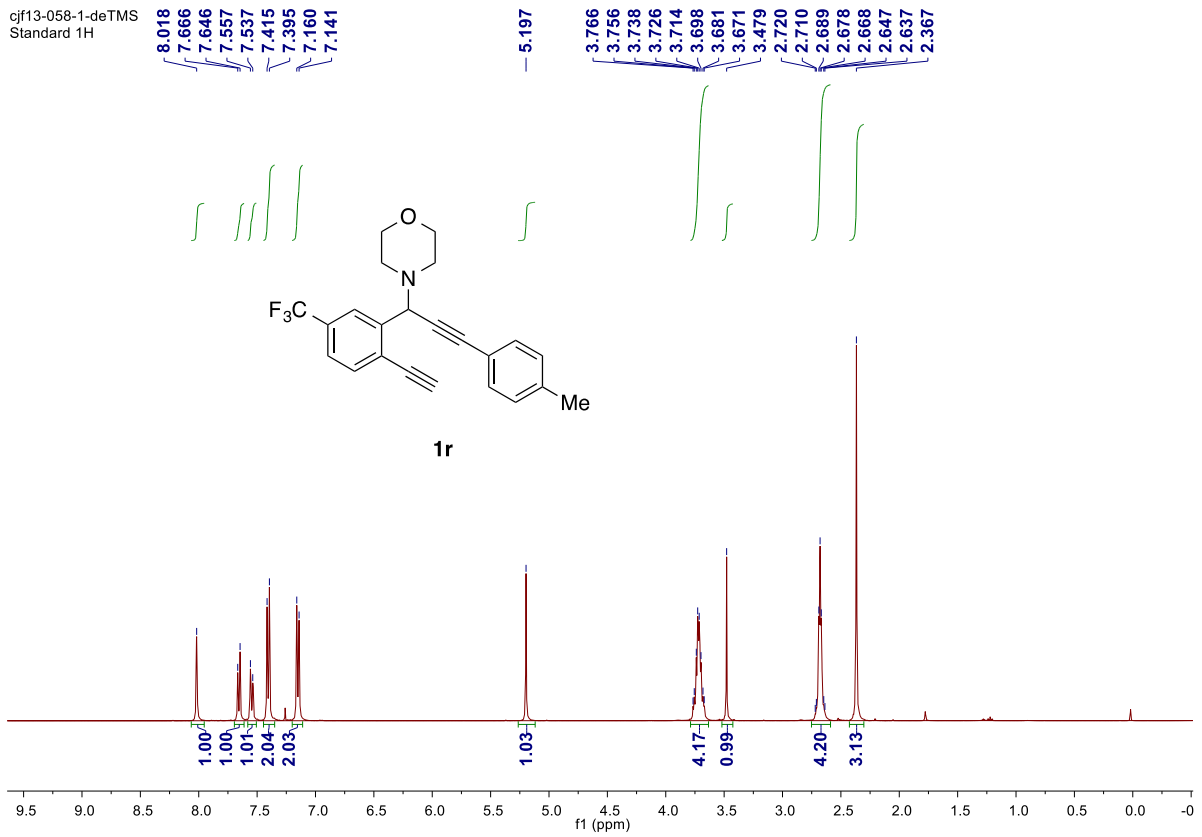

# <sup>13</sup>C NMR

cfj13-058-1-deTMS  
Standard 13C

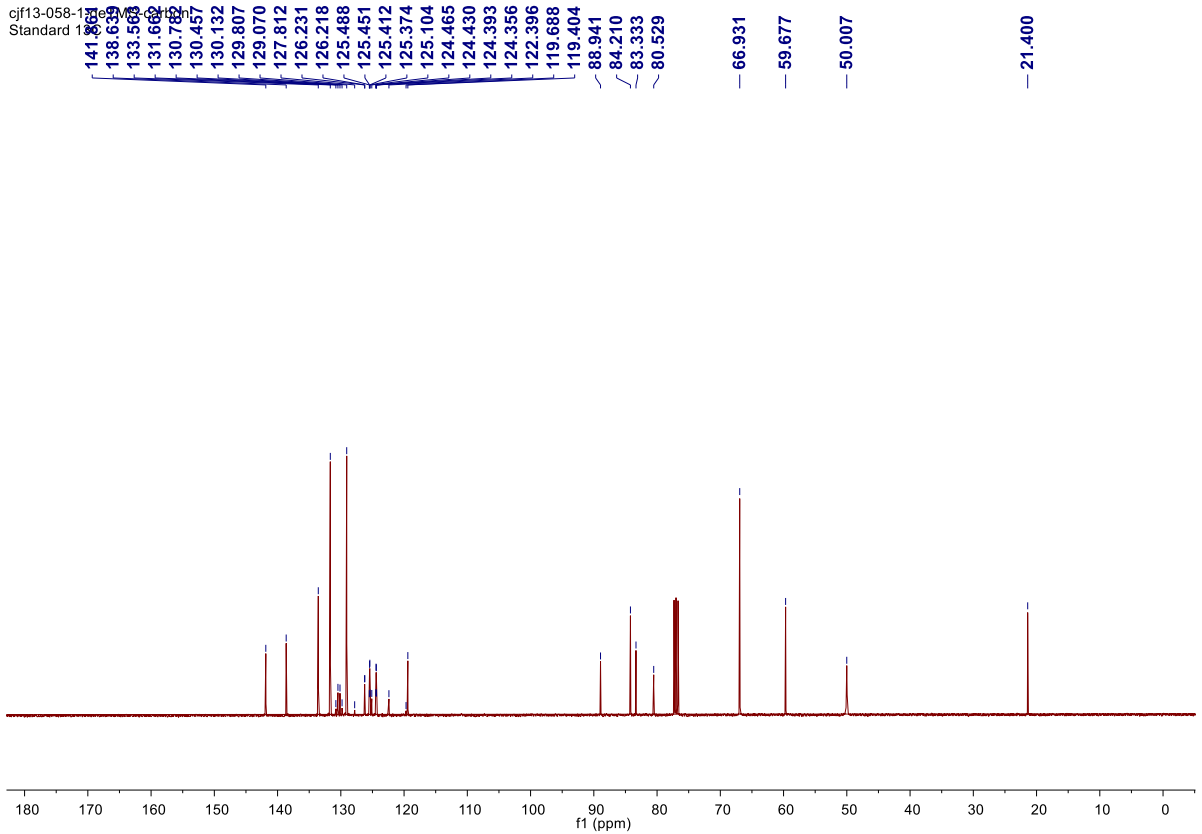

# <sup>1</sup>H NMR

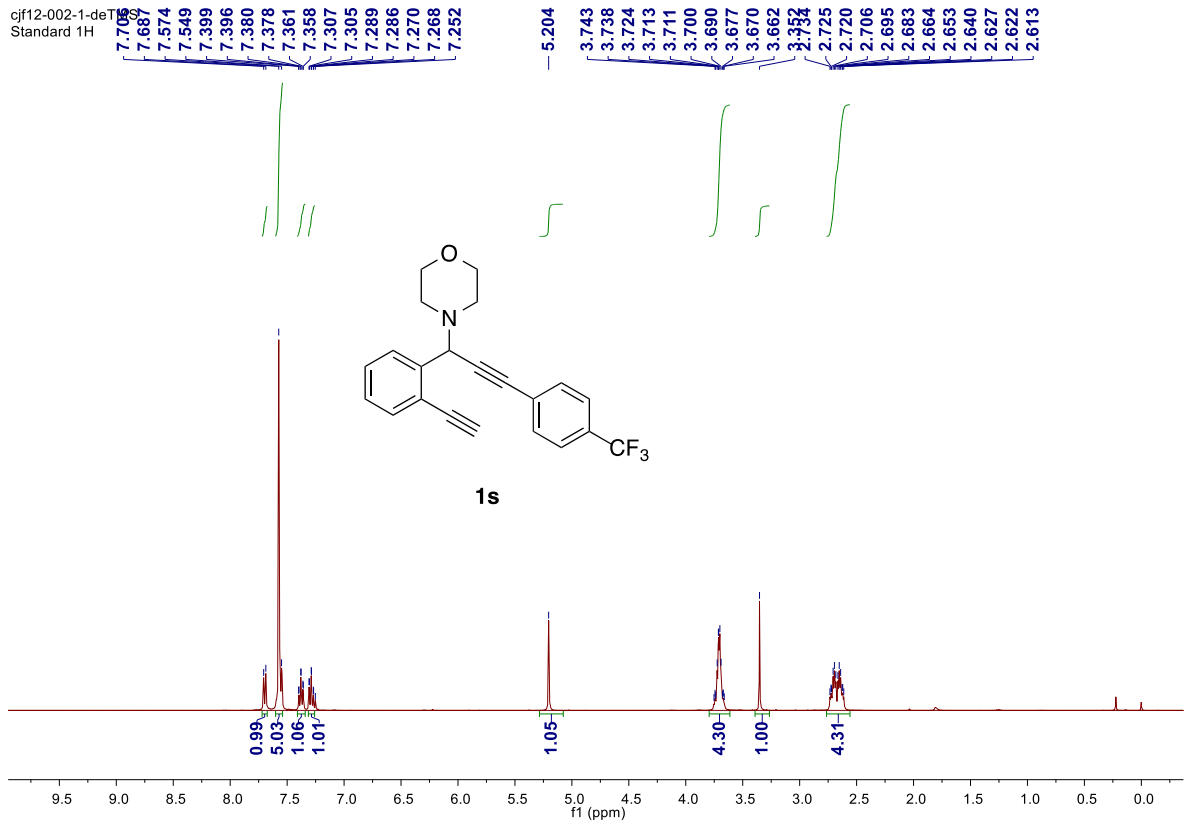

# <sup>13</sup>C NMR

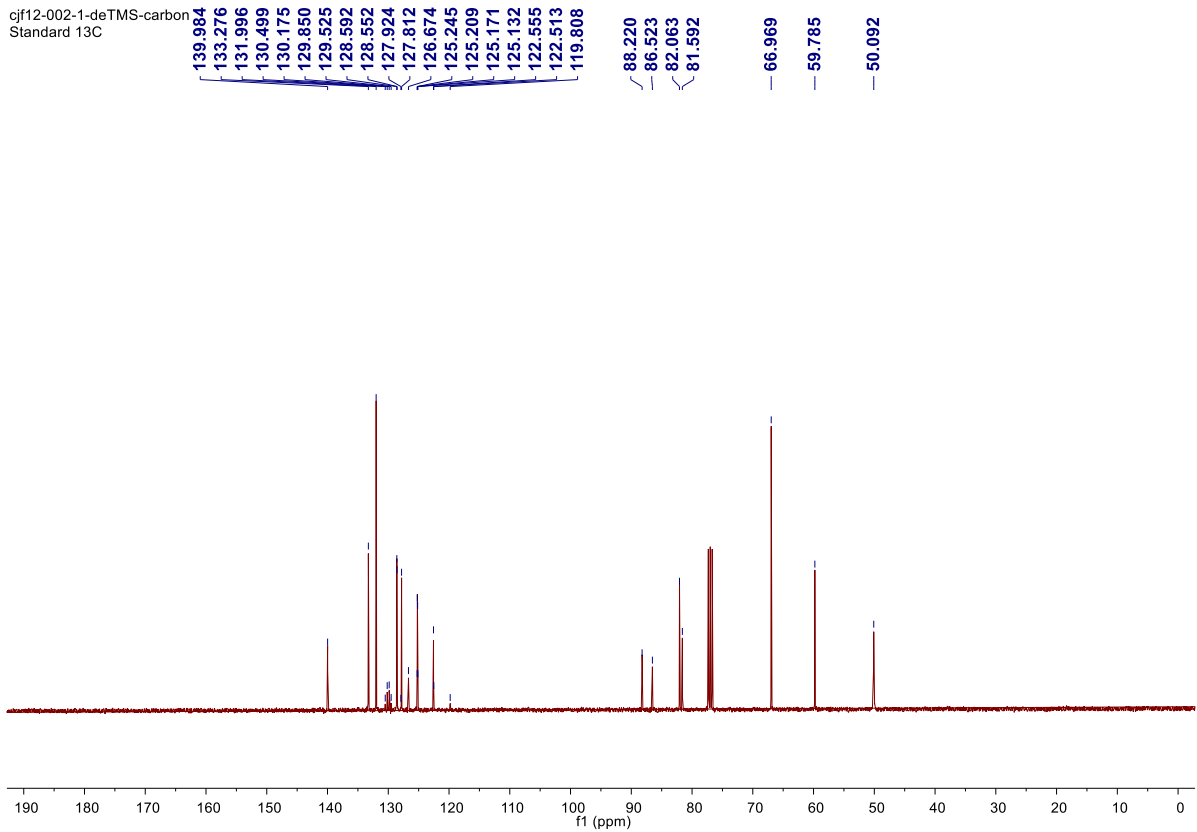

# <sup>1</sup>H NMR

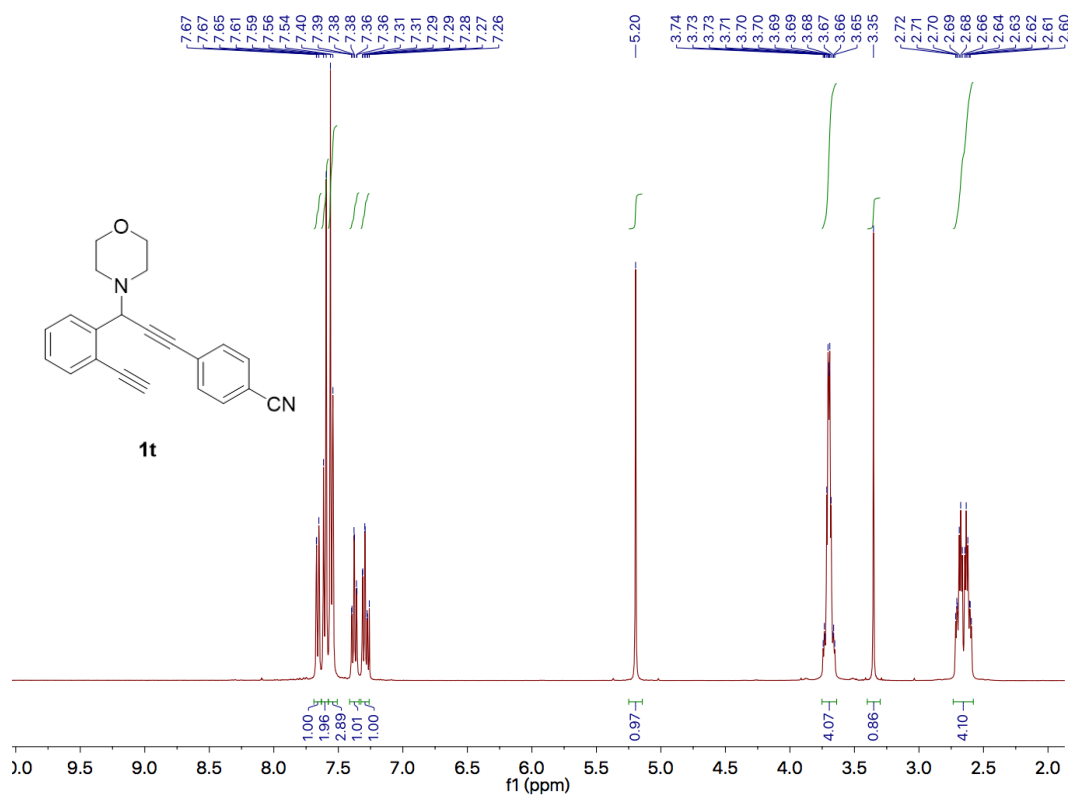

# <sup>13</sup>C NMR

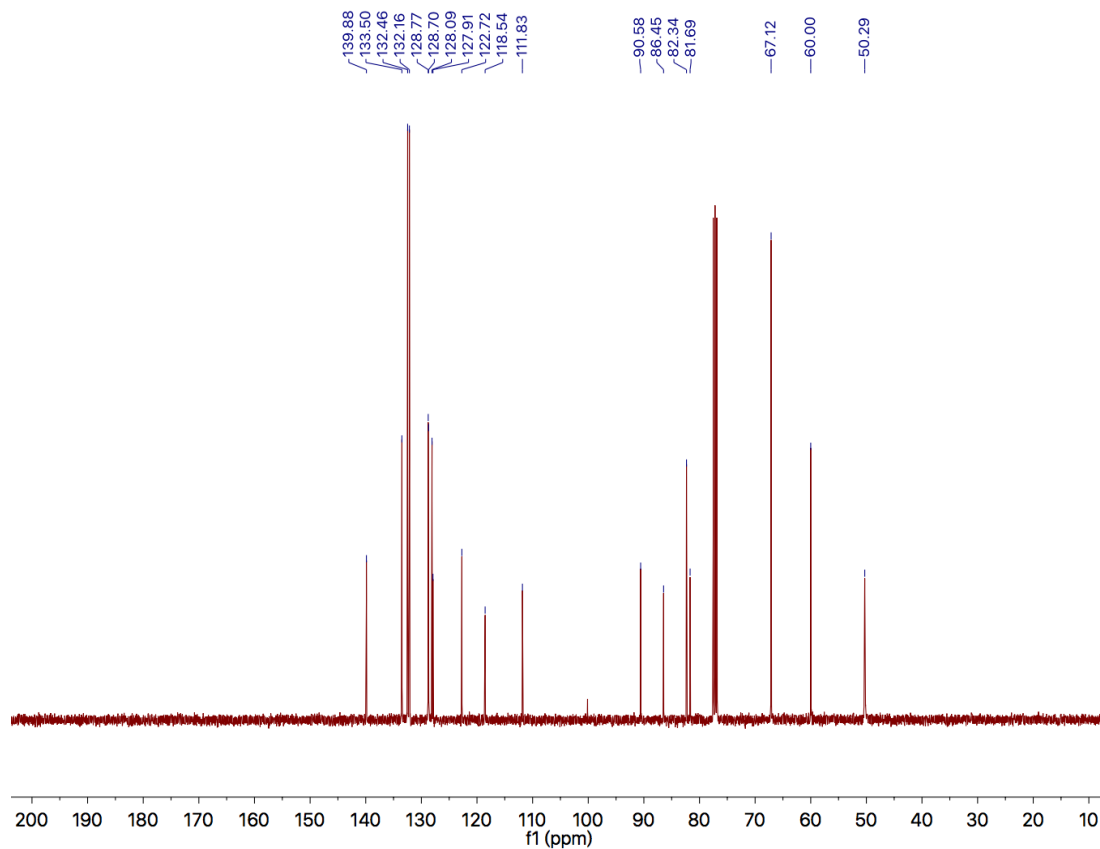

# <sup>1</sup>H NMR

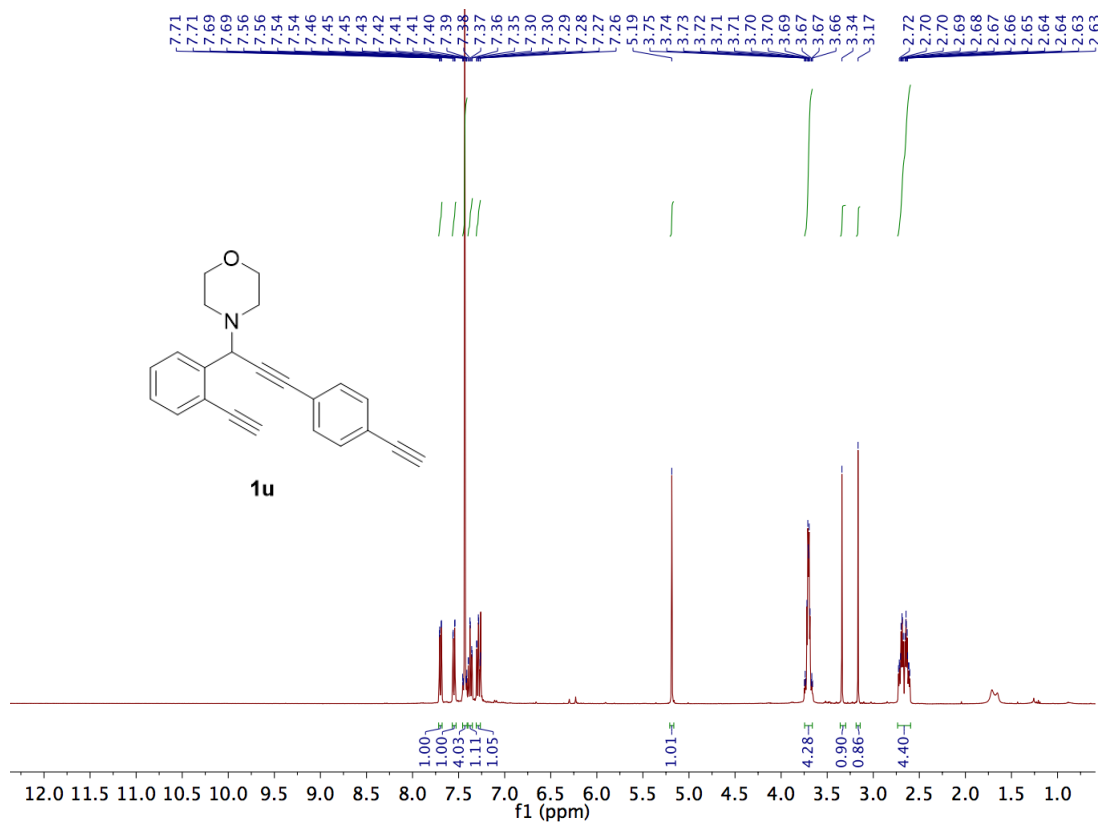

# <sup>13</sup>C NMR

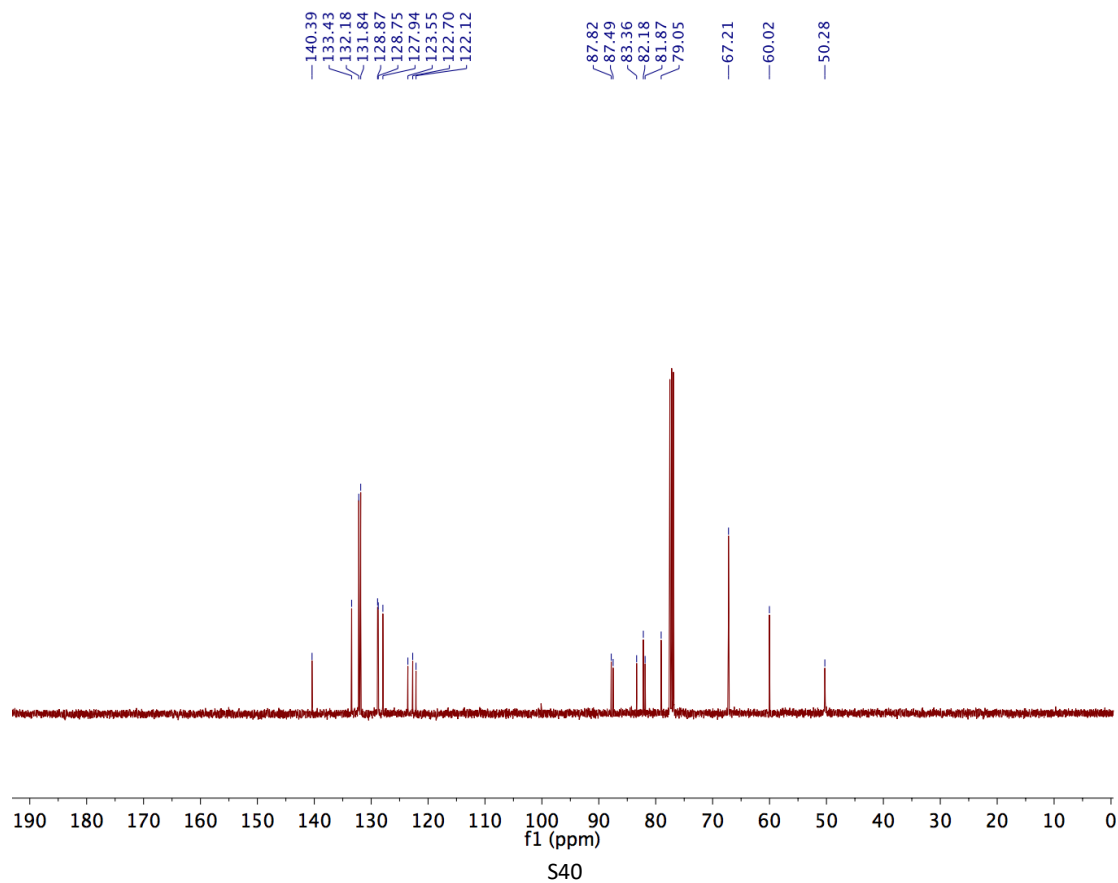



# <sup>1</sup>H NMR

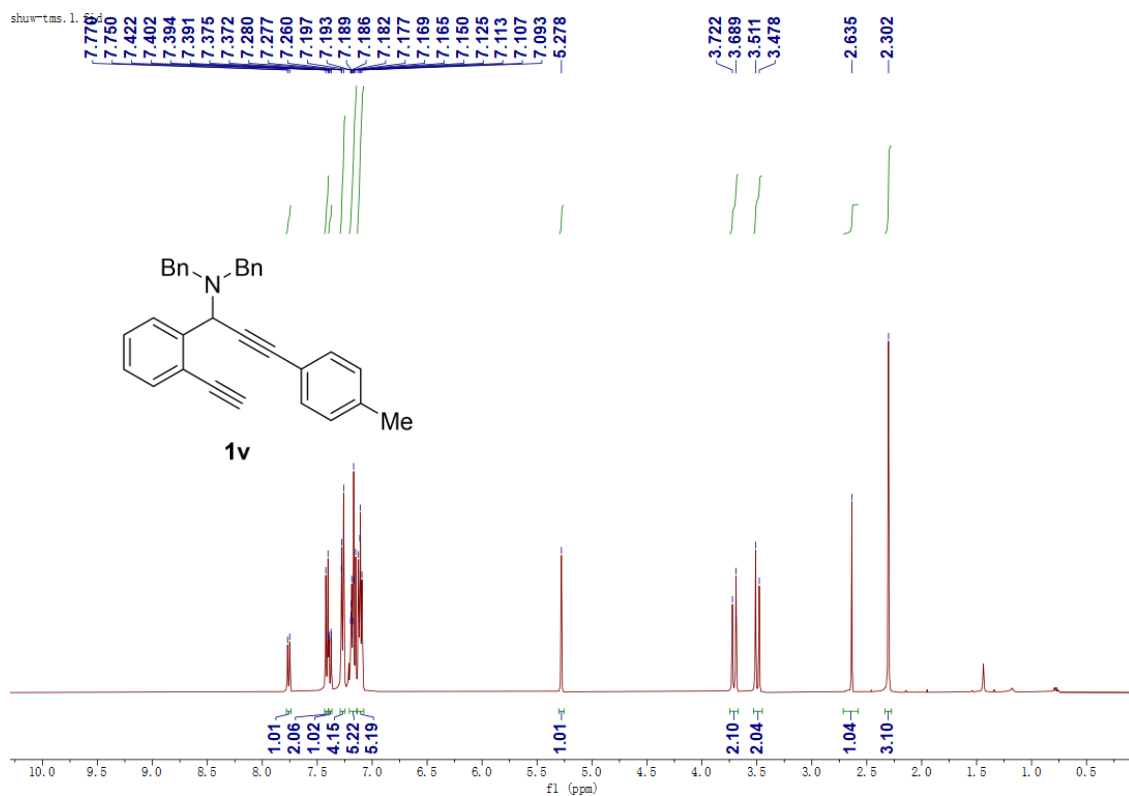

# <sup>13</sup>C NMR

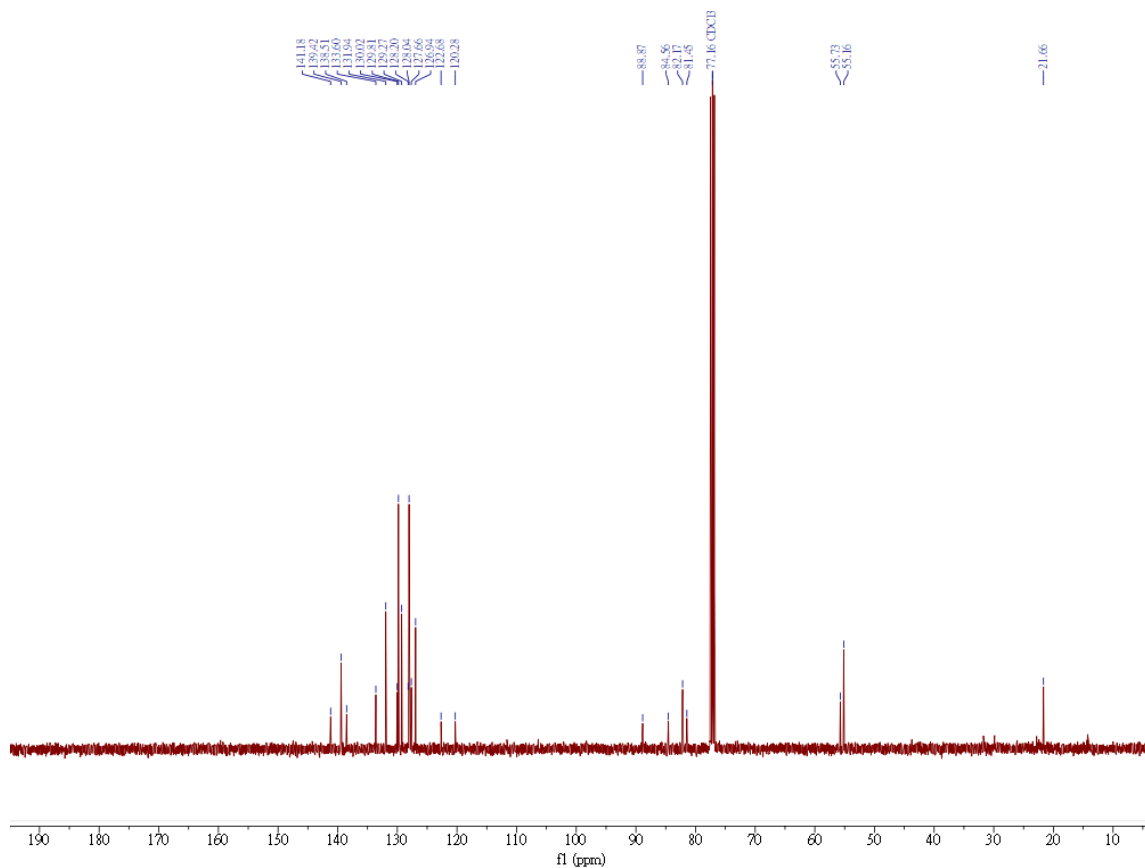

# <sup>1</sup>H NMR

yq-02-117

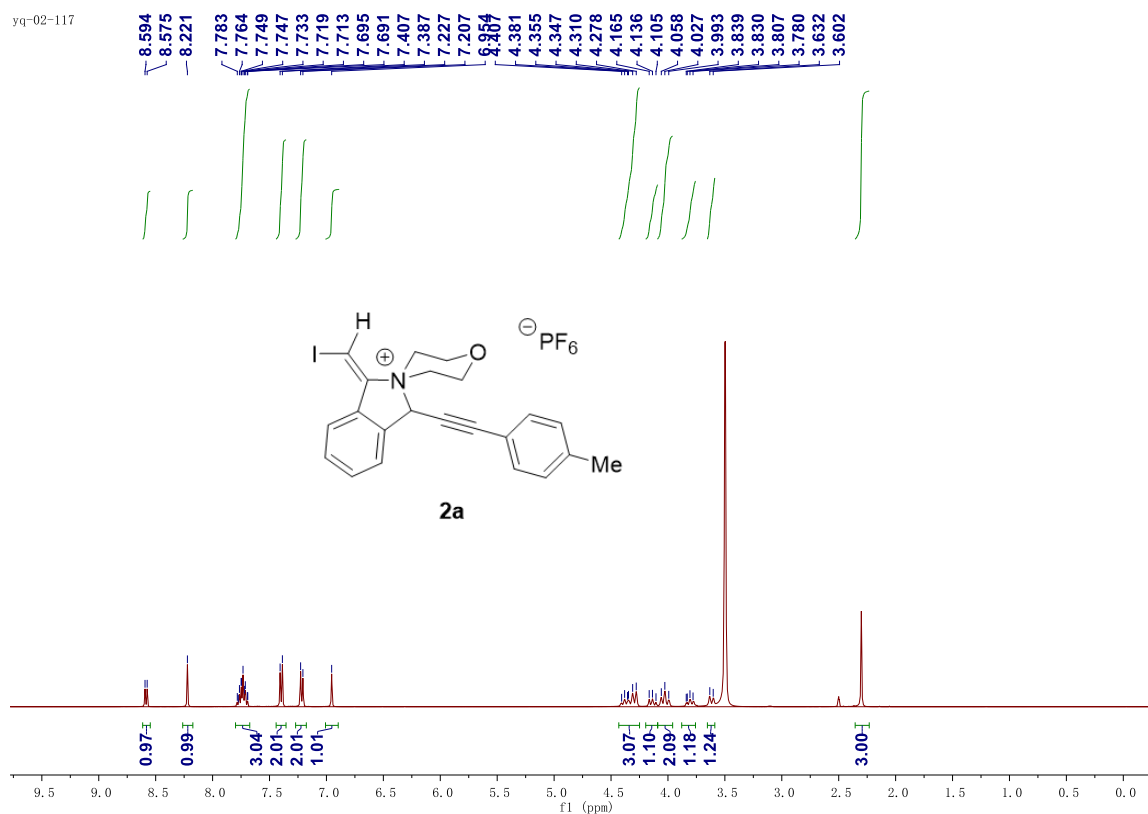

# <sup>13</sup>C NMR

yq-02-117

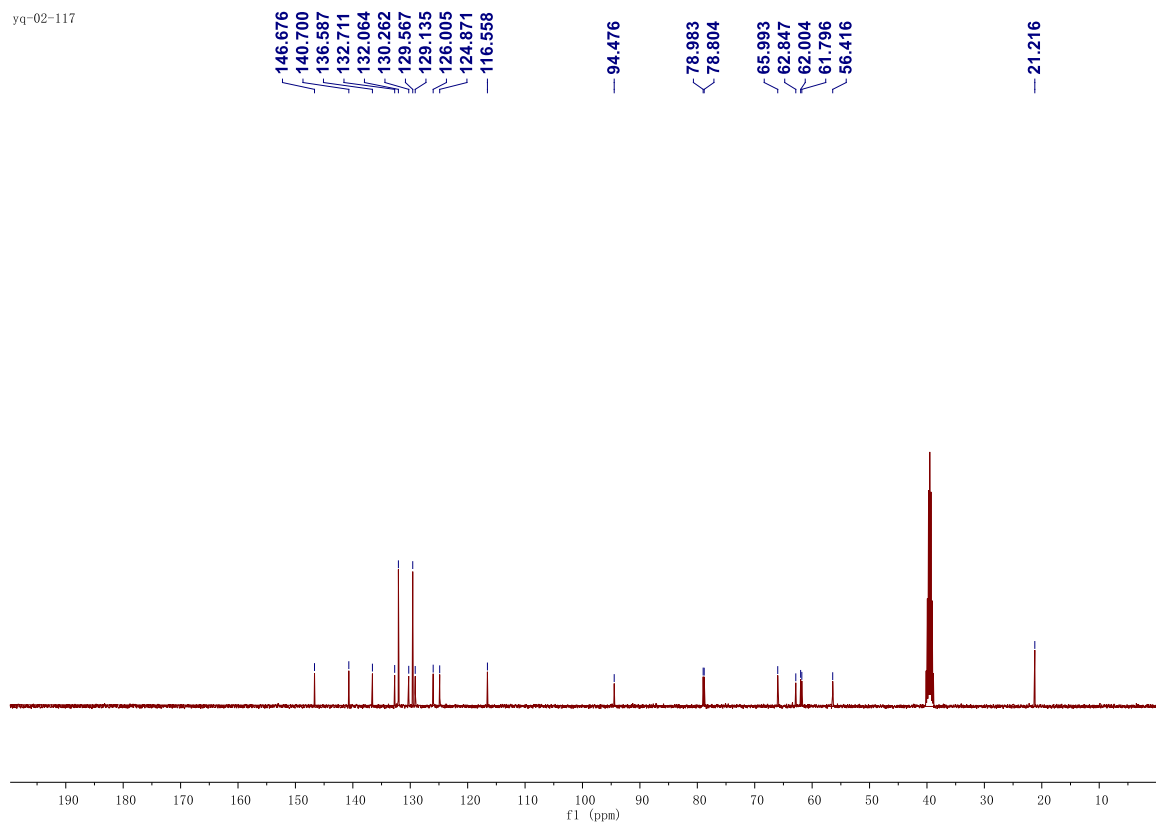

# <sup>1</sup>H NMR

yq-02-121

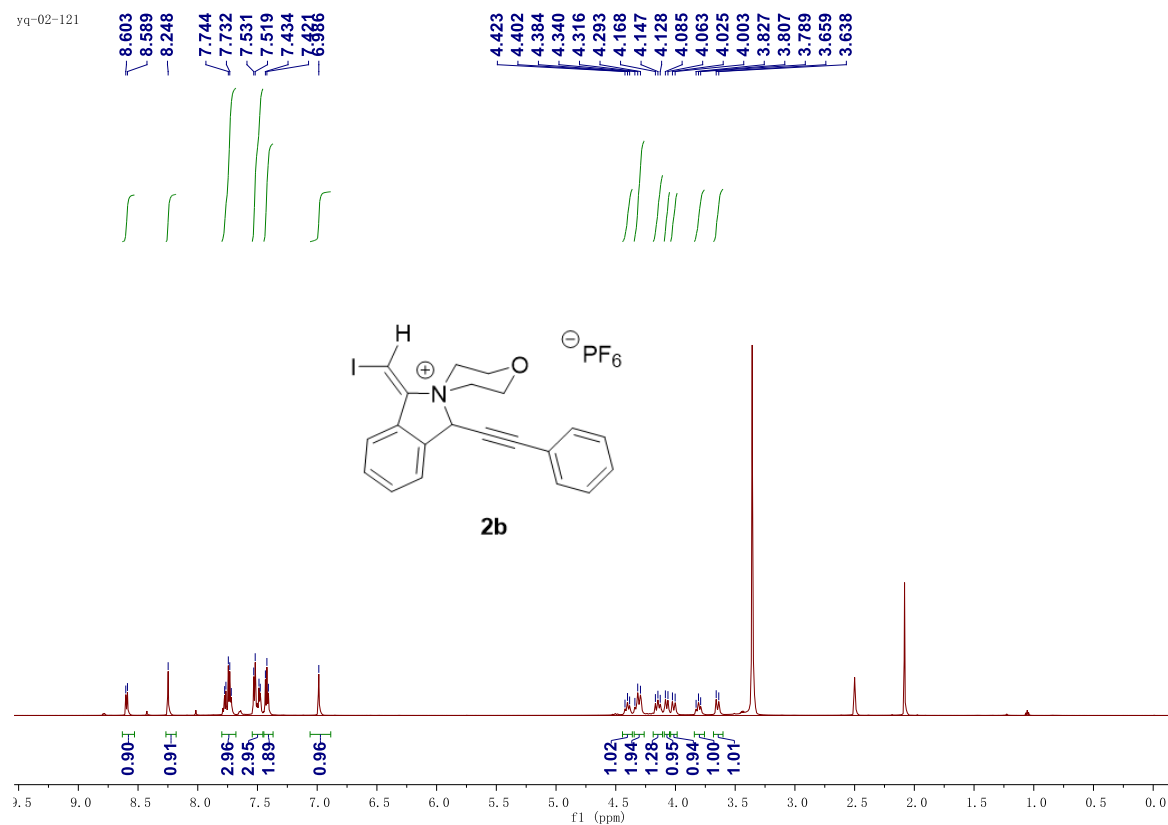

# <sup>13</sup>C NMR

yq-02-121

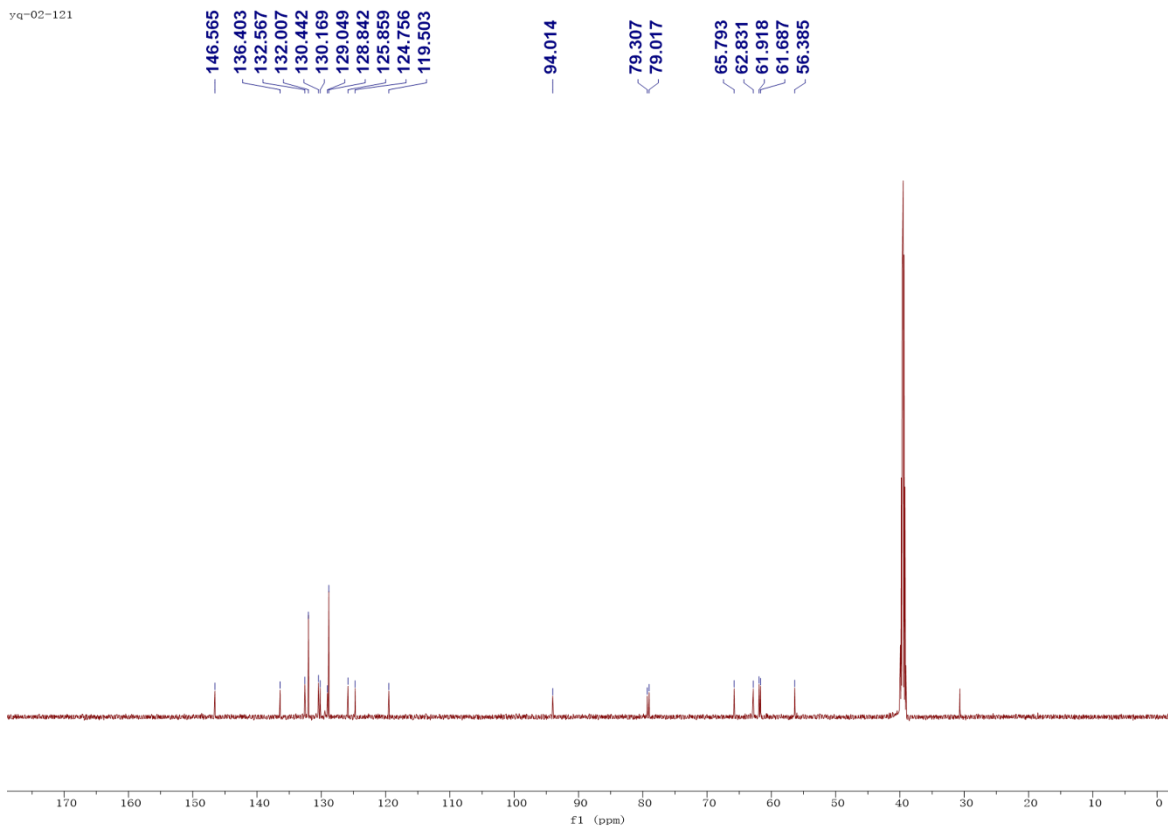

# <sup>1</sup>H NMR

YQ-01-48

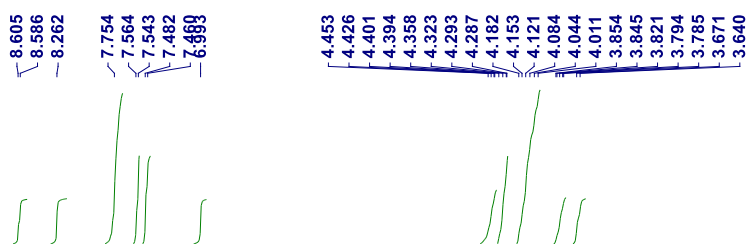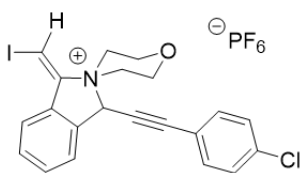

2c

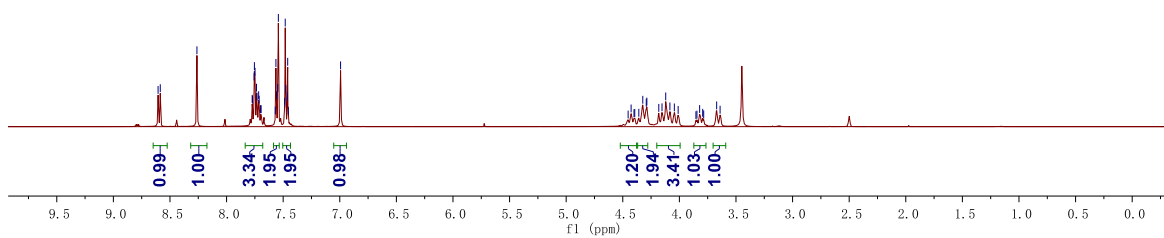

# <sup>13</sup>C NMR

YQ-01-48

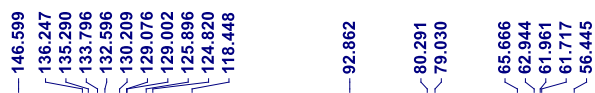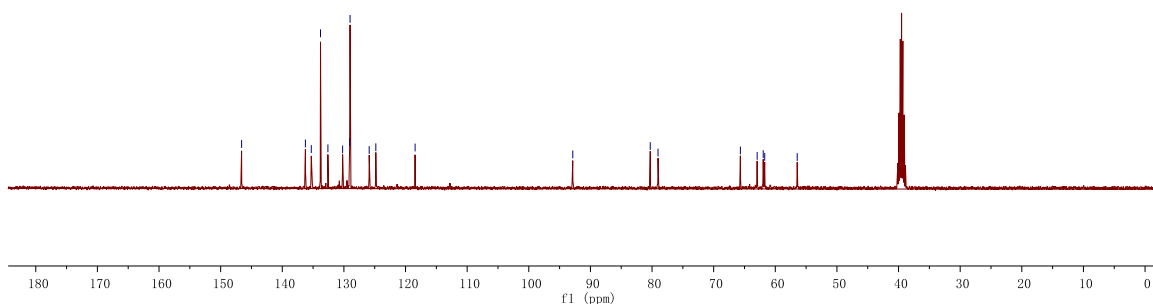

# <sup>1</sup>H NMR

YQ-F-20190707-1

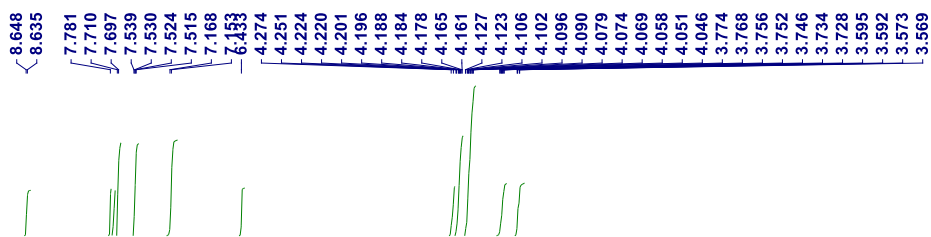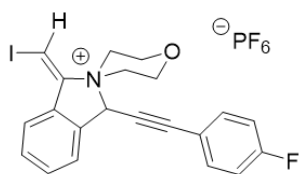

2d

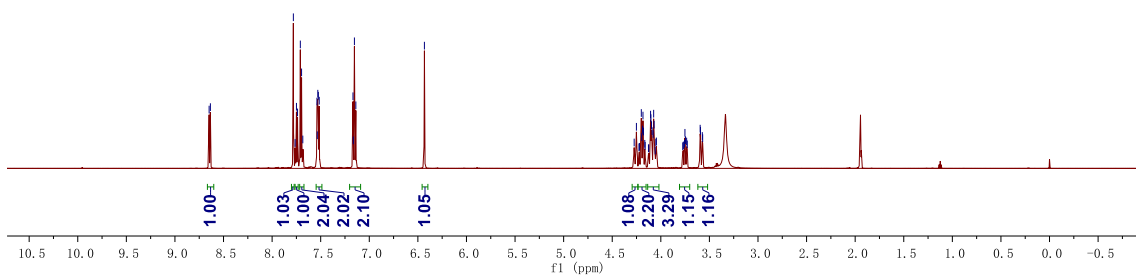

# <sup>13</sup>C NMR

YQ-F-20190707-C13

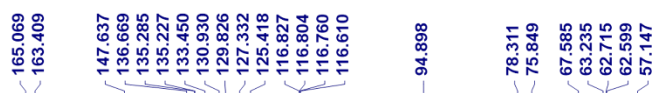

# <sup>1</sup>H NMR

yq-02-79-HH

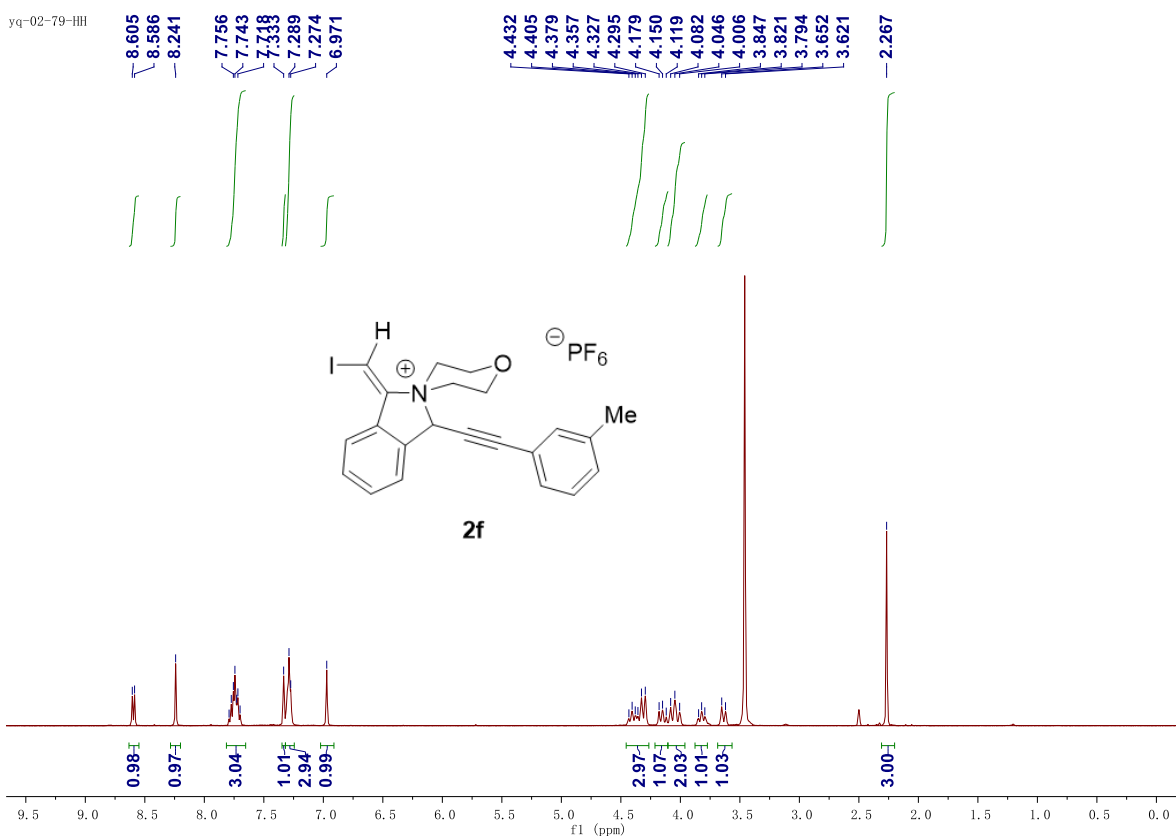

# <sup>13</sup>C NMR

yq-02-79-C

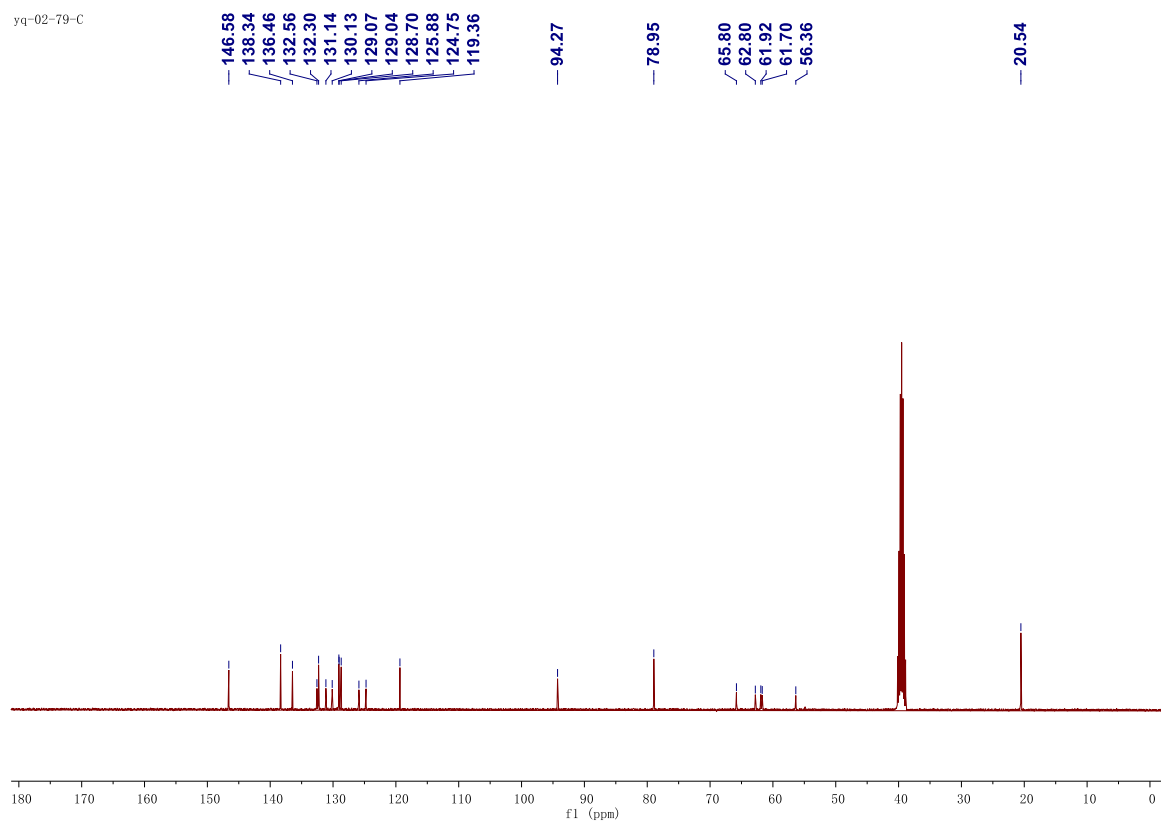

# <sup>1</sup>H NMR

yq-02-95-H

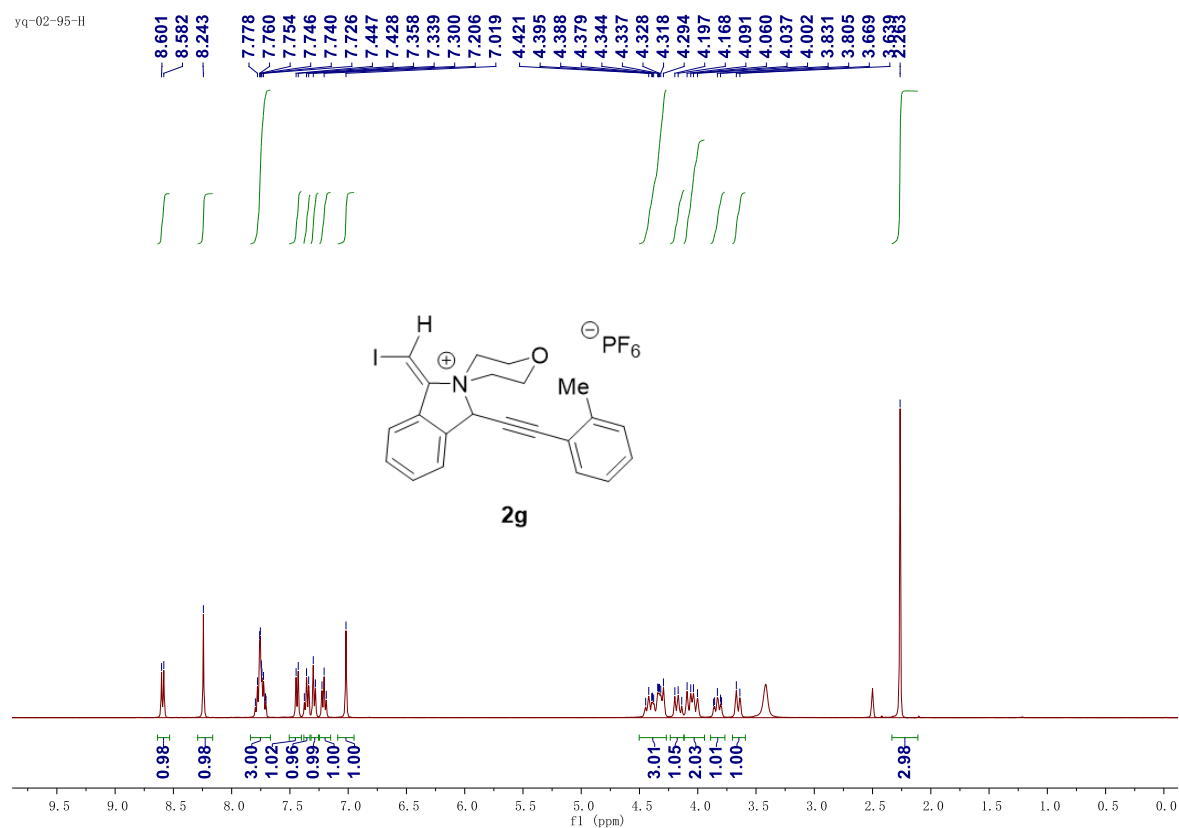

# <sup>13</sup>C NMR

yq-02-95-C

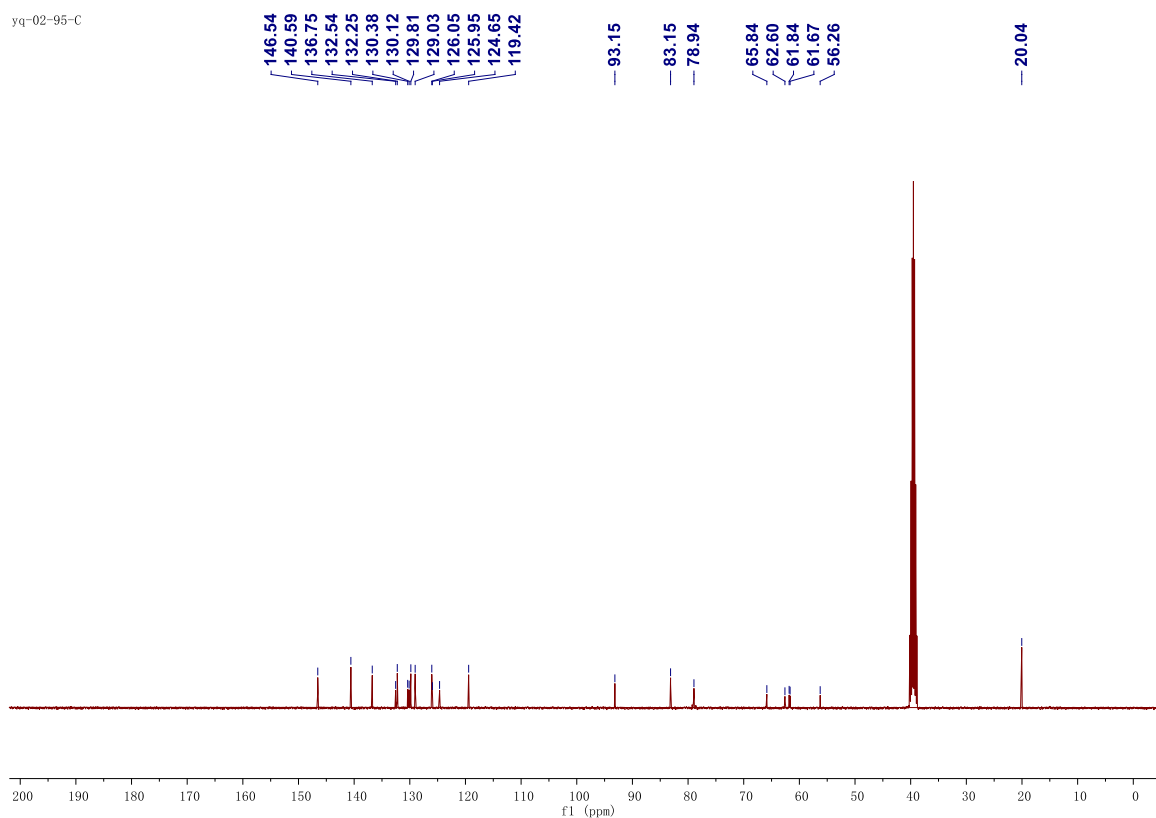

# <sup>1</sup>H NMR

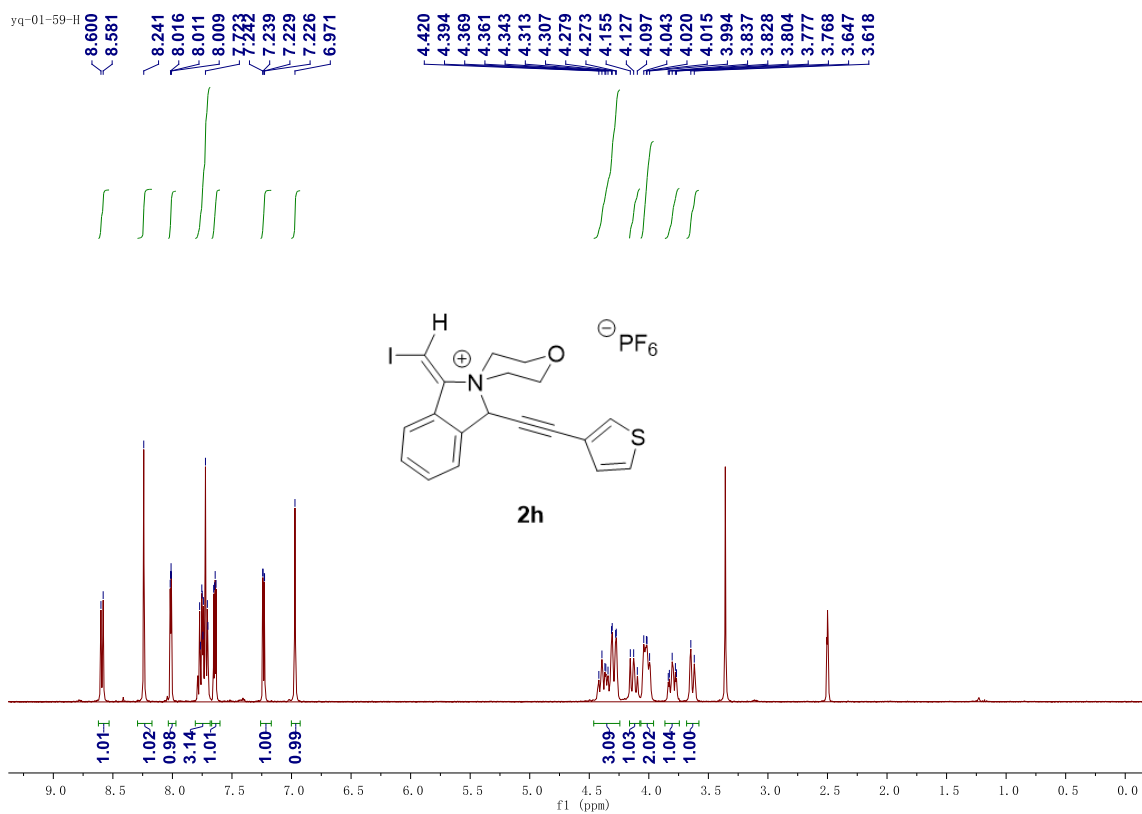

# <sup>13</sup>C NMR

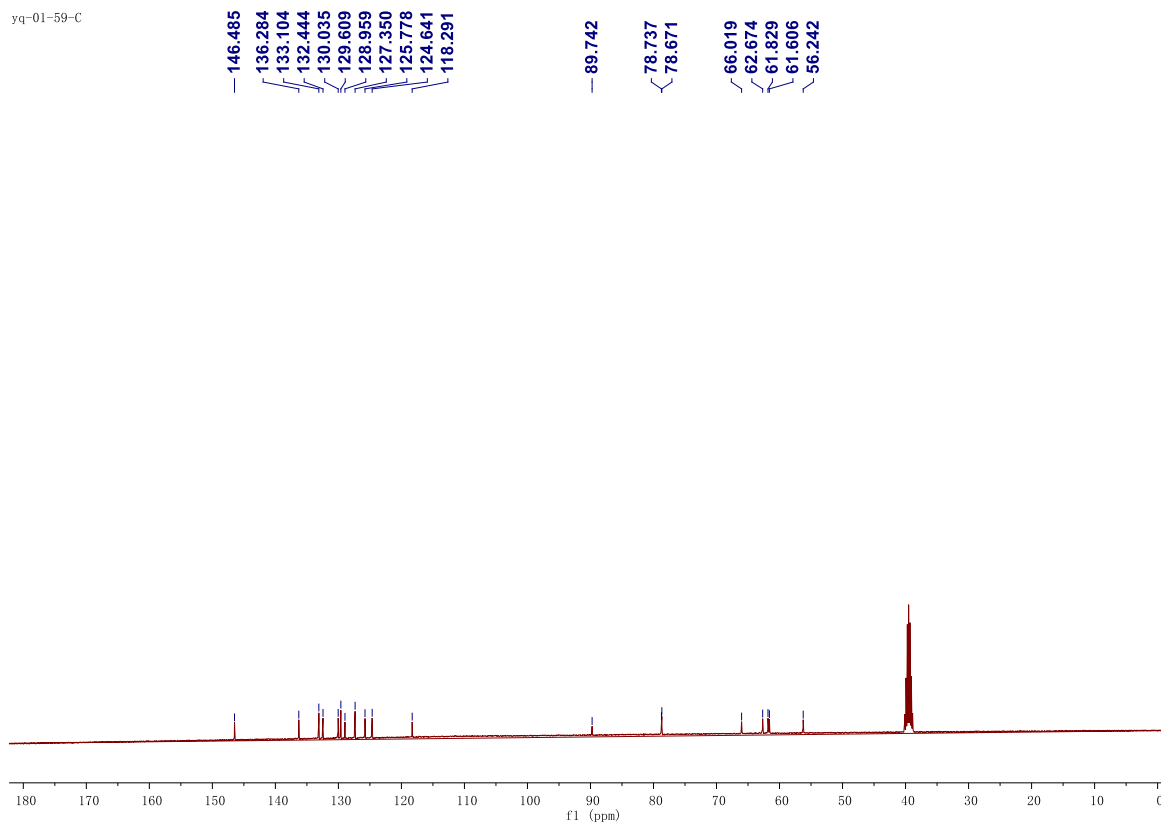



# <sup>1</sup>H NMR

yq-02-85-H

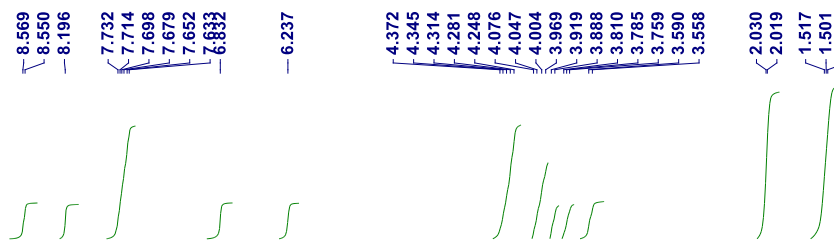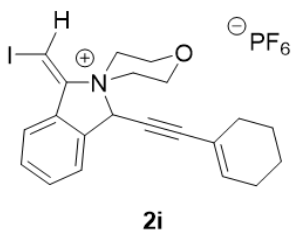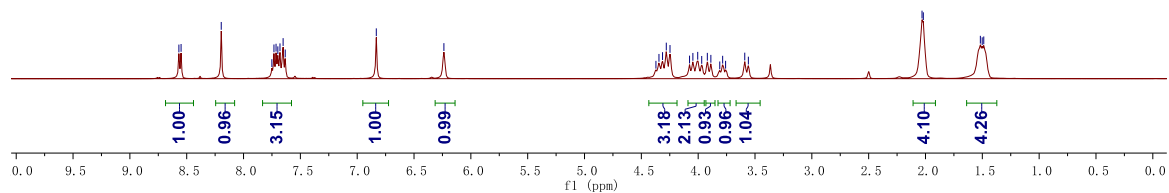

# <sup>13</sup>C NMR

yq-02-85-C

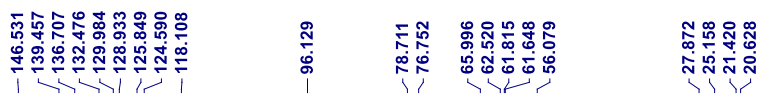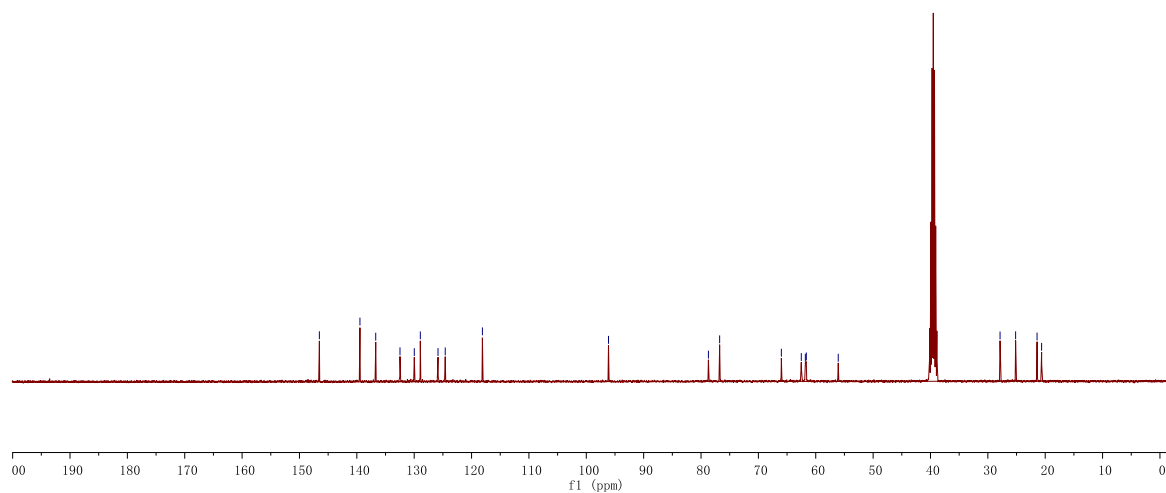

# <sup>1</sup>H NMR

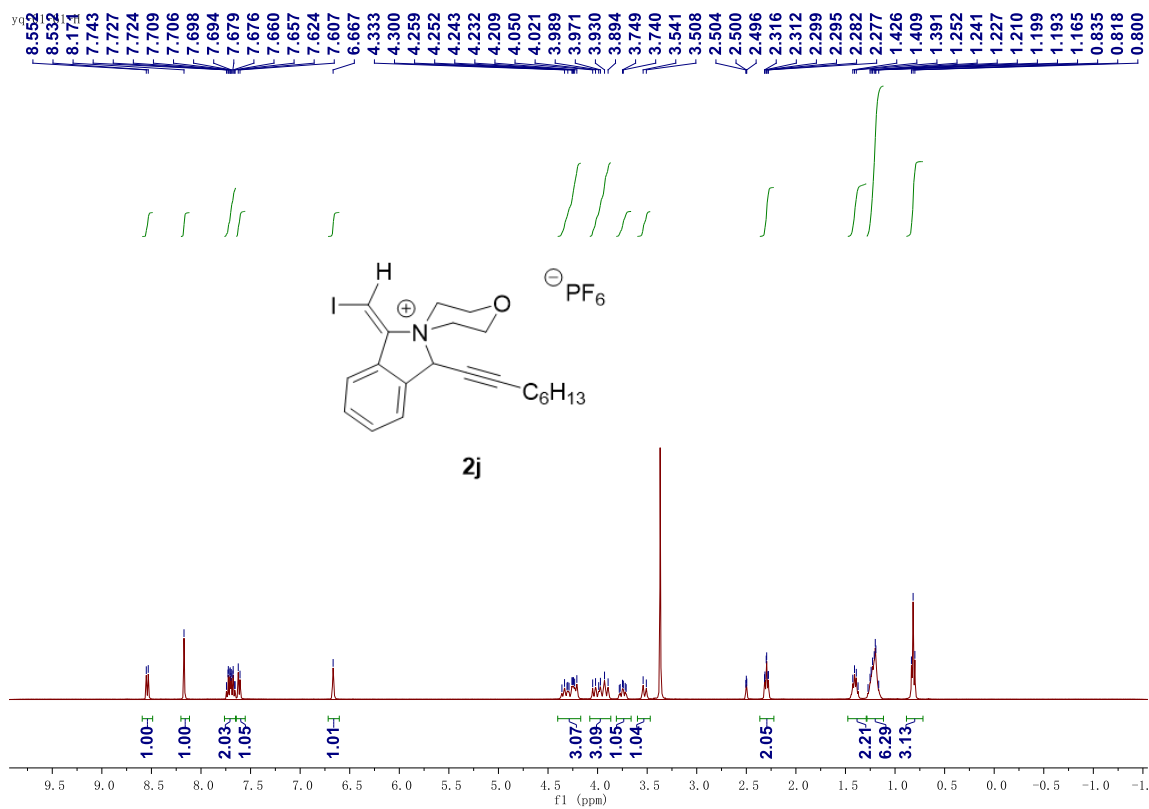

# <sup>13</sup>C NMR

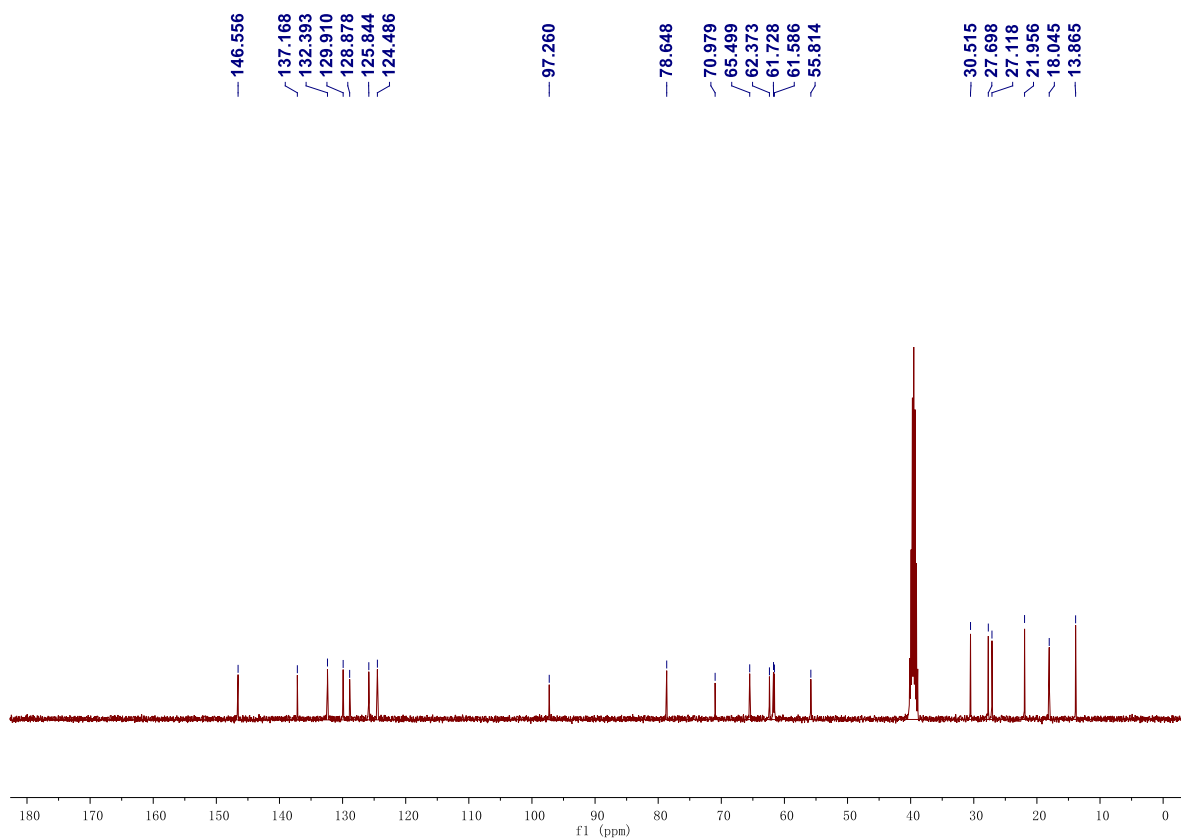

# <sup>1</sup>H NMR

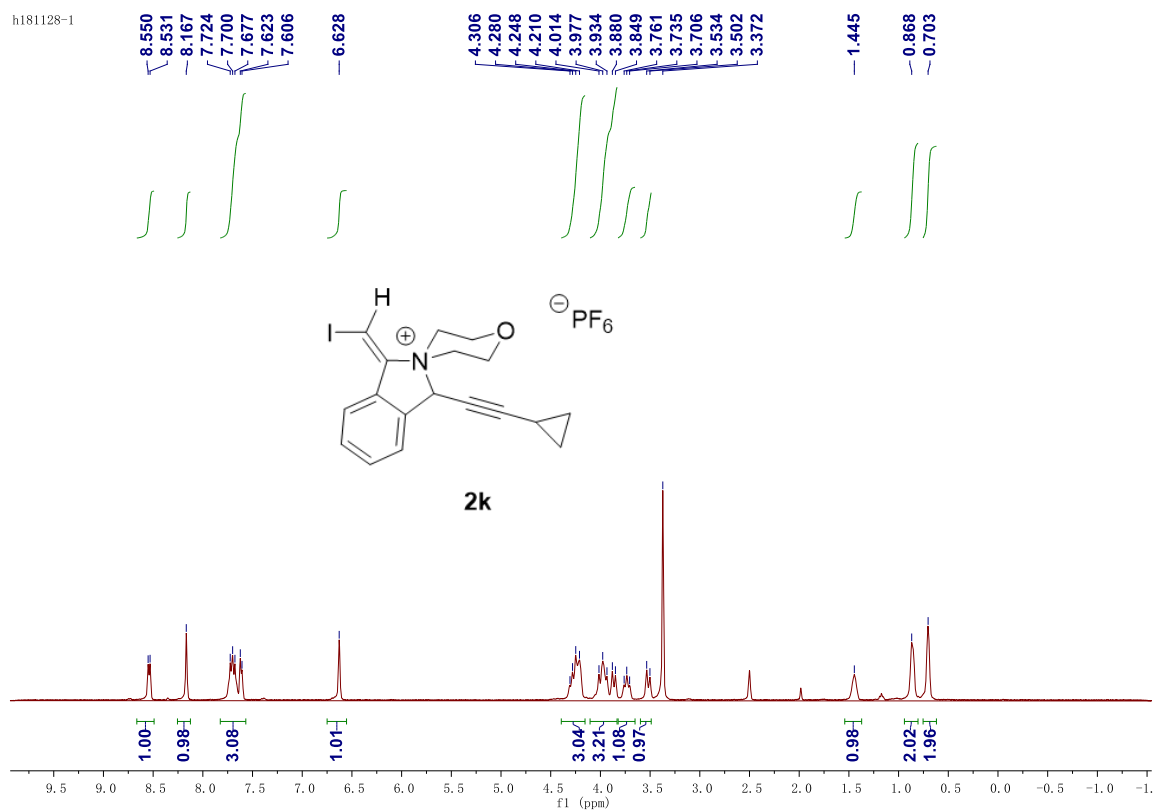

# <sup>13</sup>C NMR

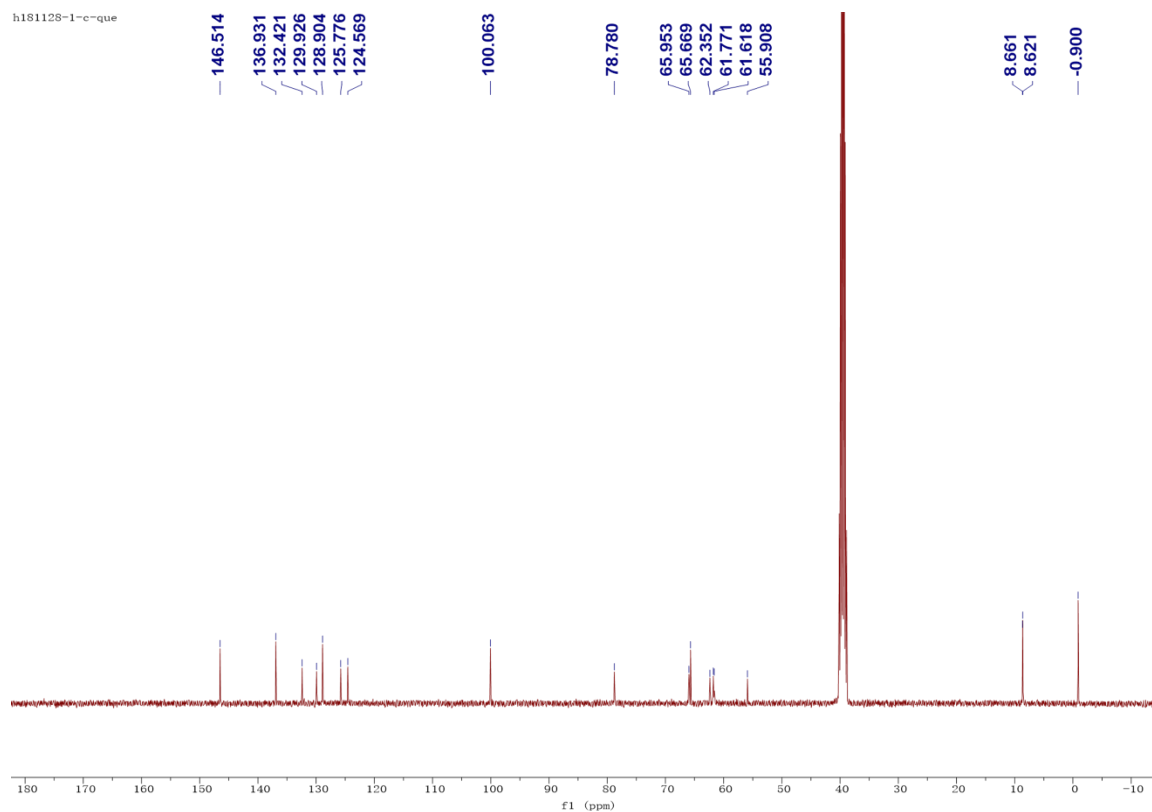

# <sup>1</sup>H NMR

yq-02-127

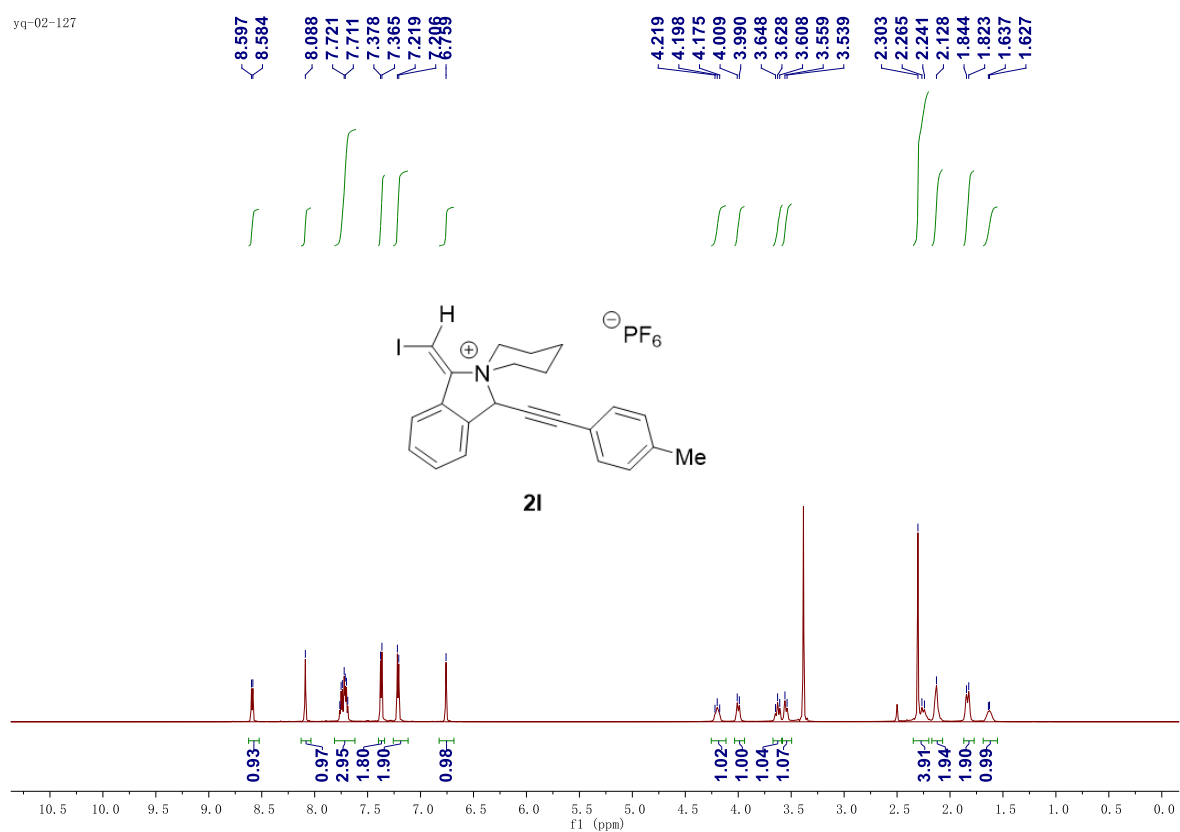

# <sup>13</sup>C NMR

yq-02-127

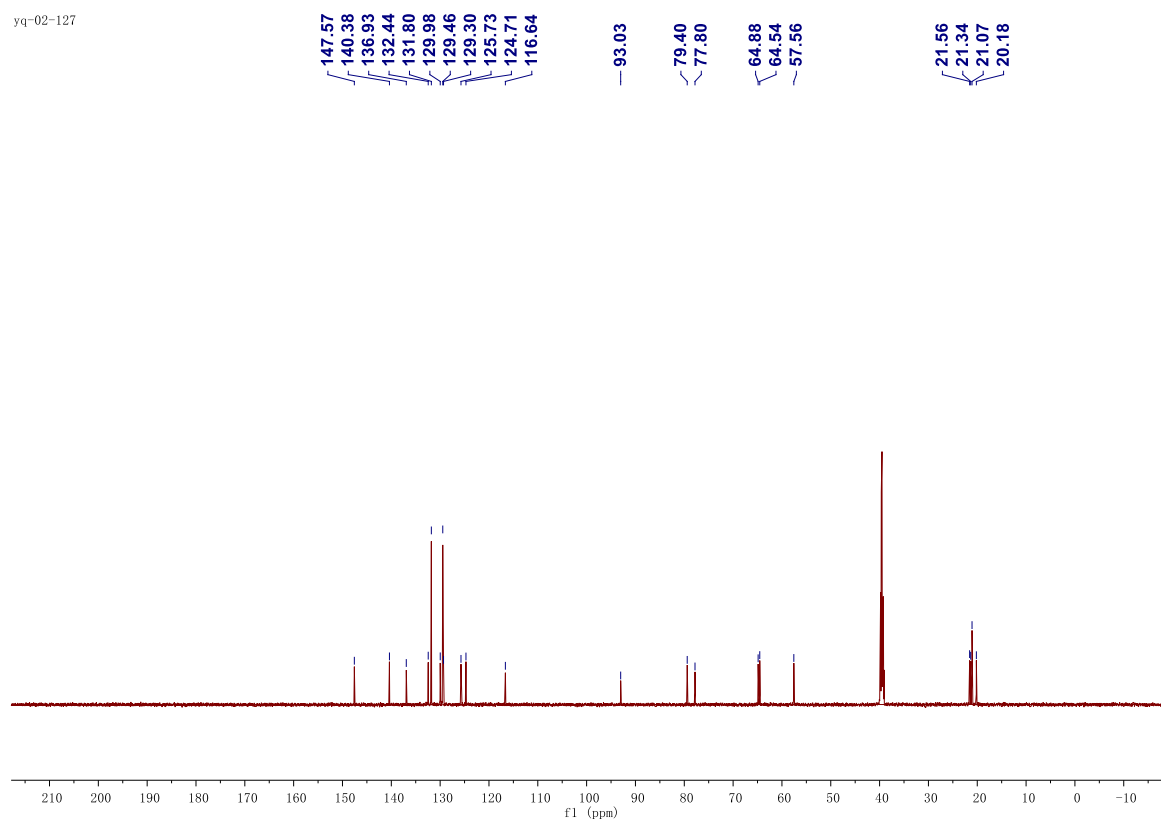

# <sup>1</sup>H NMR

HLW-190508-3-H-CDC13  
HLW-190508-3-H-CDC13

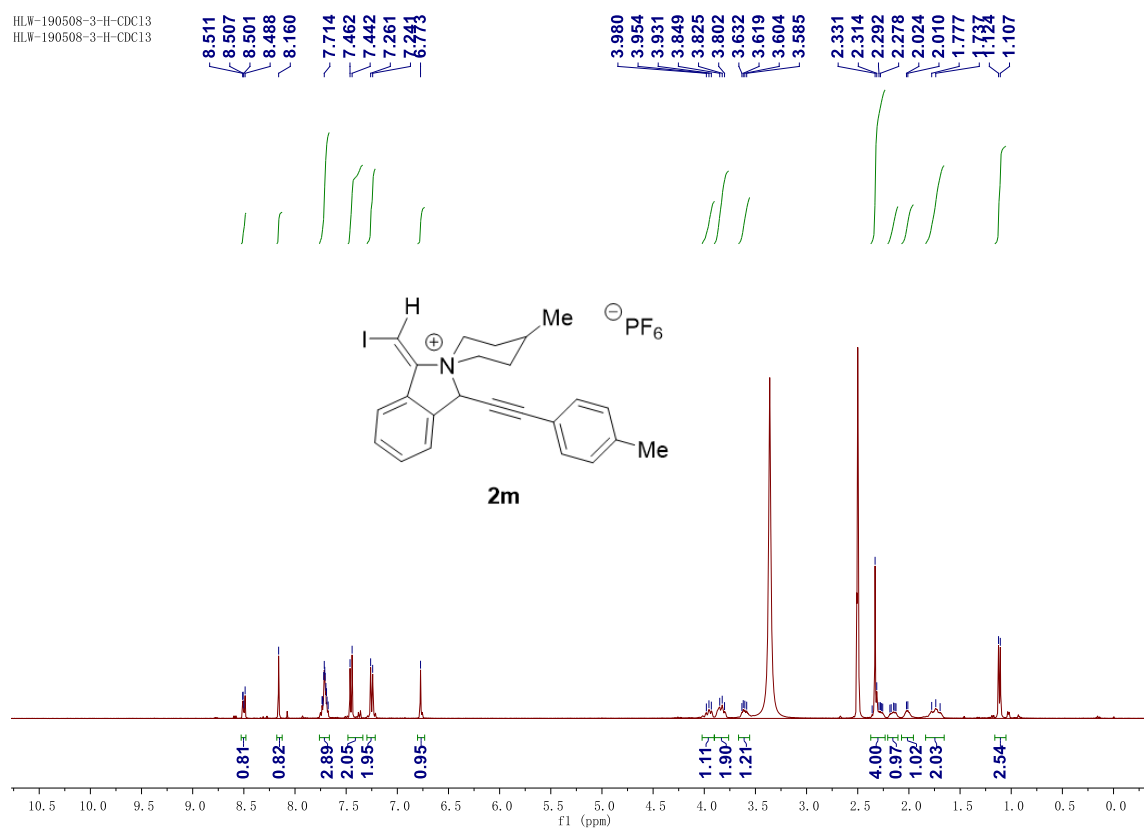

# <sup>13</sup>C NMR

HLW-190508-3--C-DMSO  
HLW-190508-3--C-DMSO  
400M

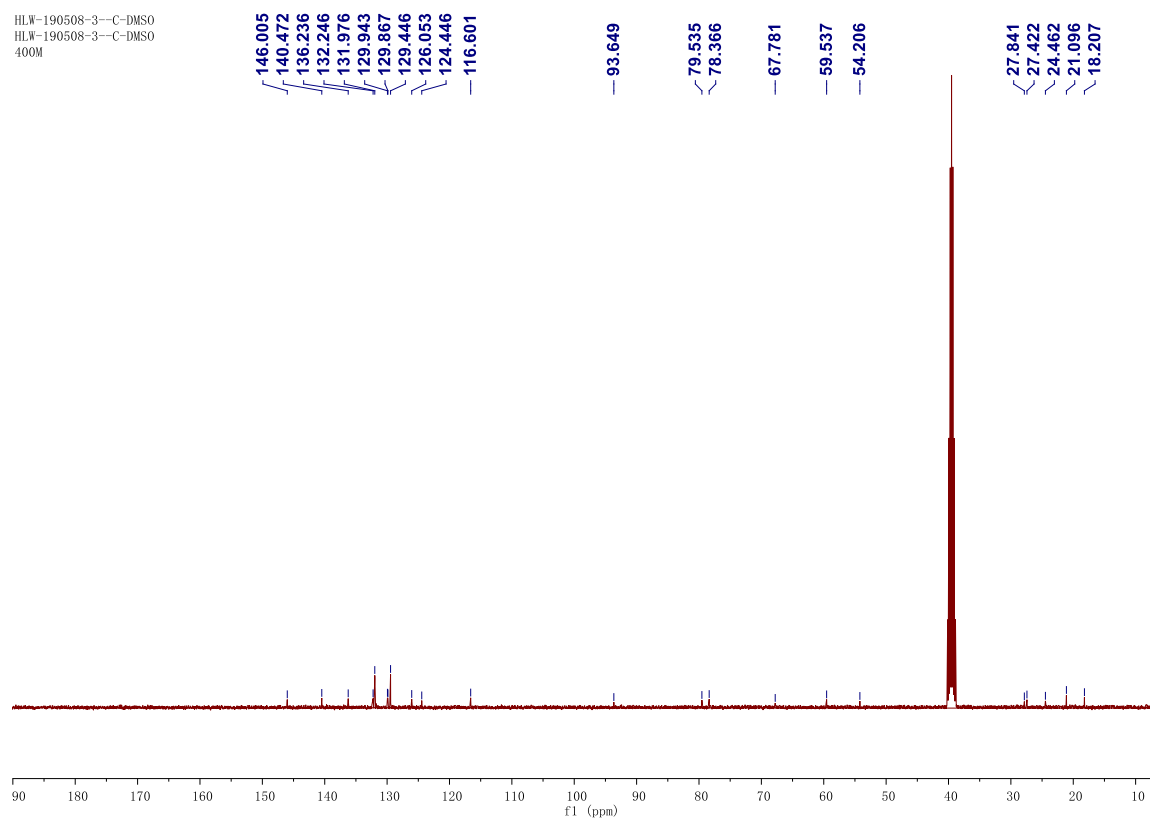

# <sup>1</sup>H NMR

YQ-C1-20190707

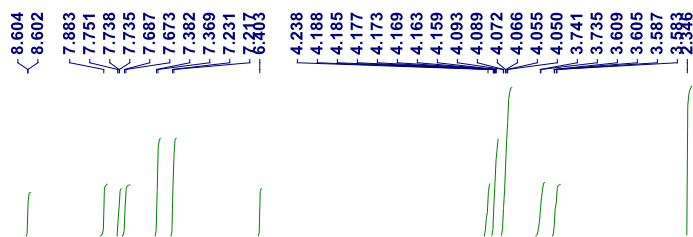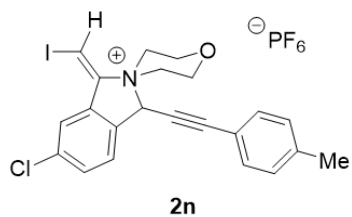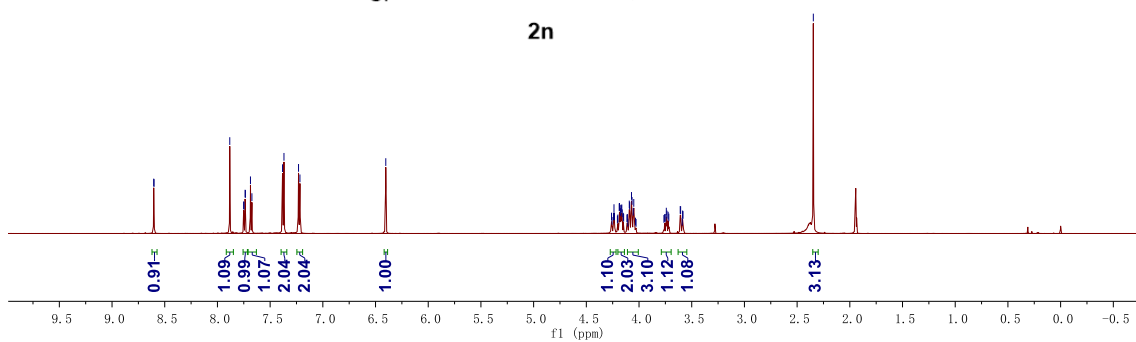

# <sup>13</sup>C NMR

YQ-C1-20190707-carbon

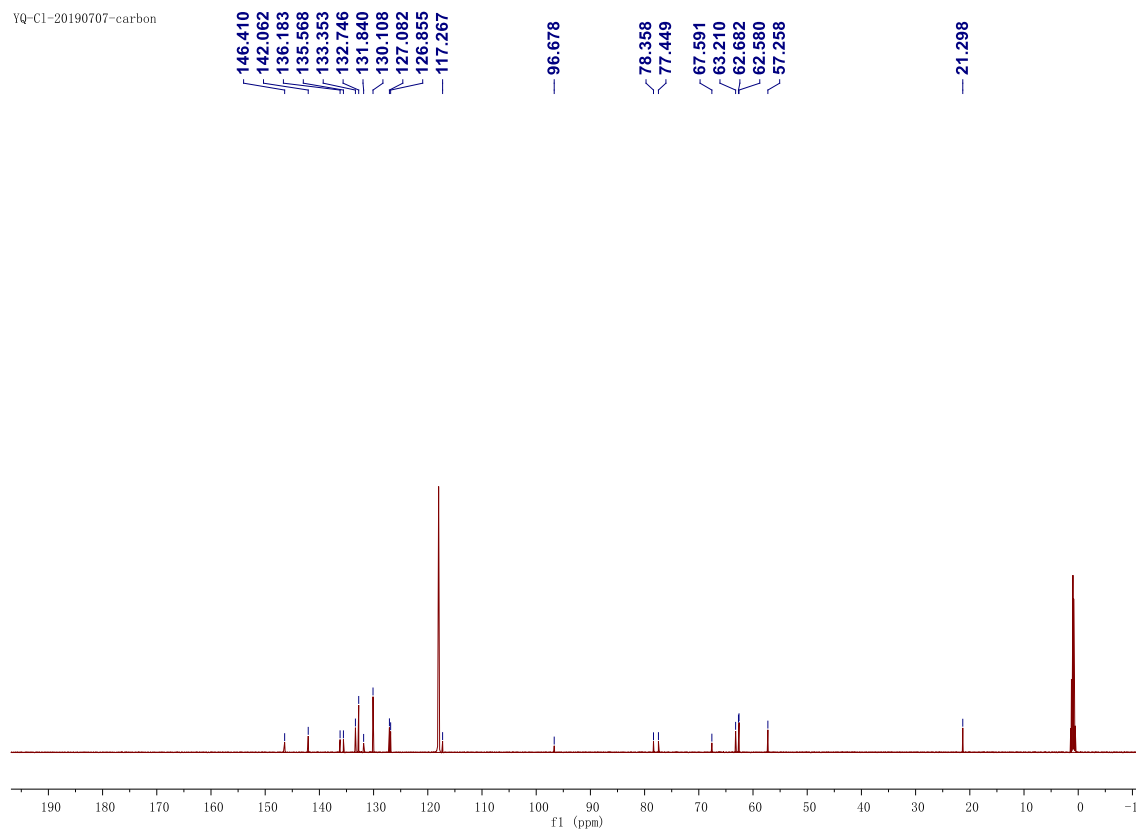

# <sup>1</sup>H NMR

h181219-1

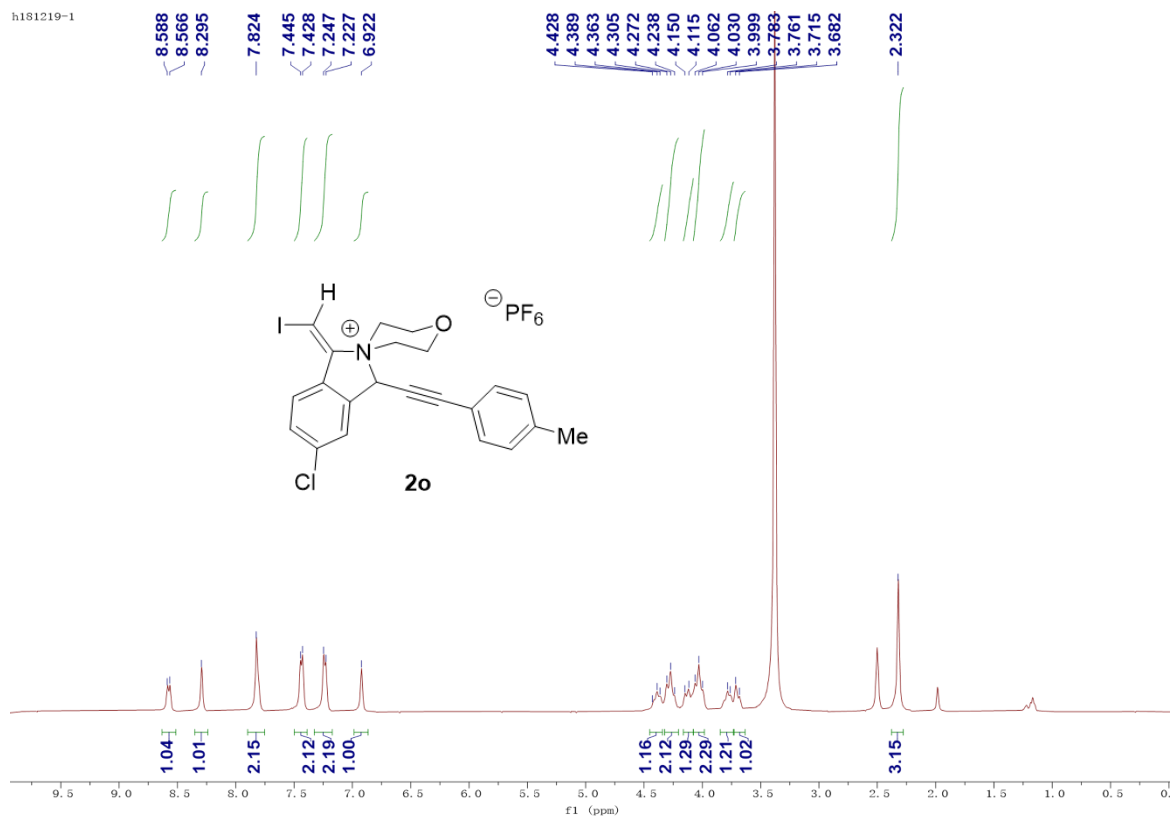

# <sup>13</sup>C NMR

h181219-1-c

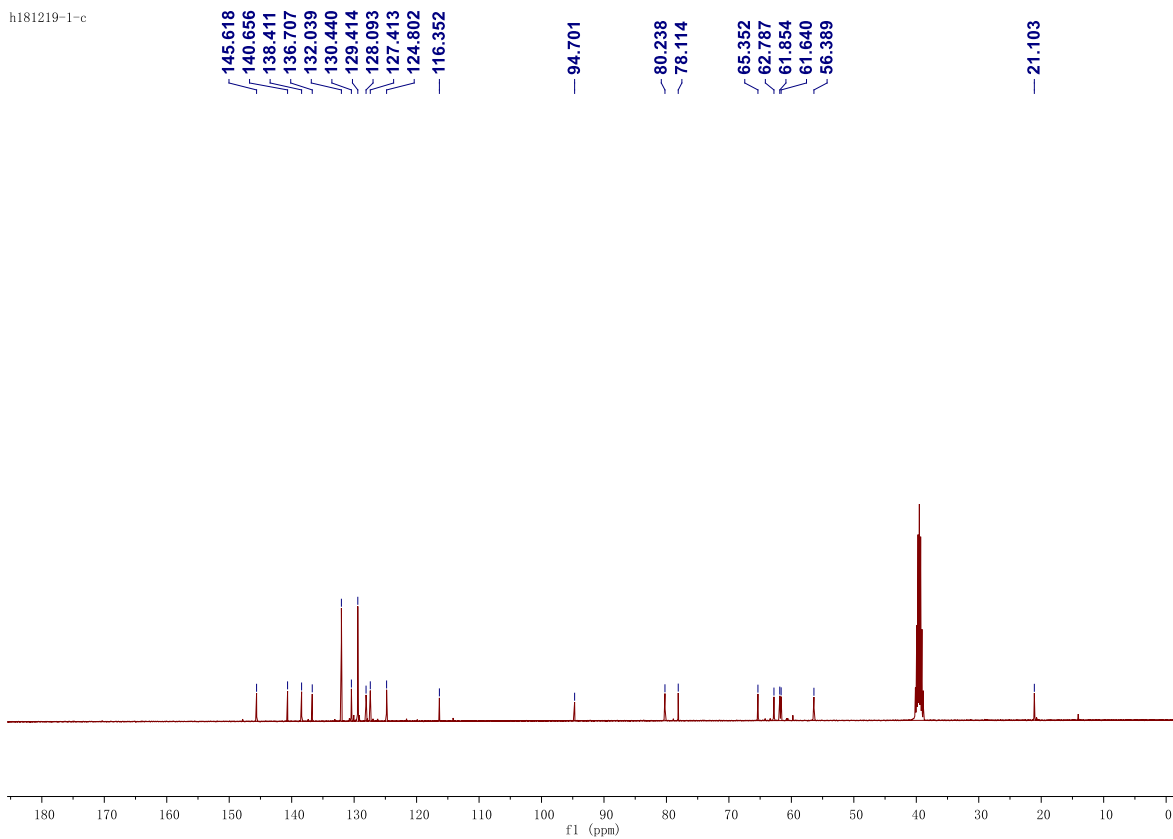

# <sup>1</sup>H NMR

yq-02-84-H

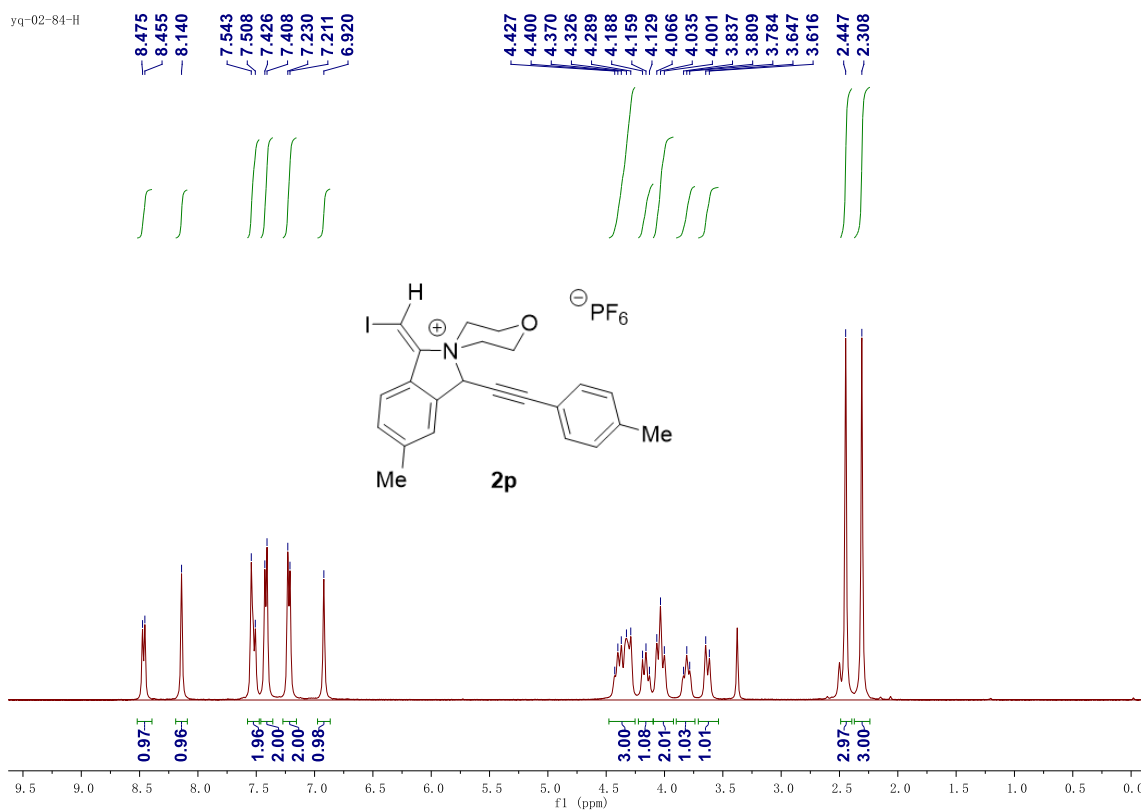

# <sup>13</sup>C NMR

yq-02-84-C

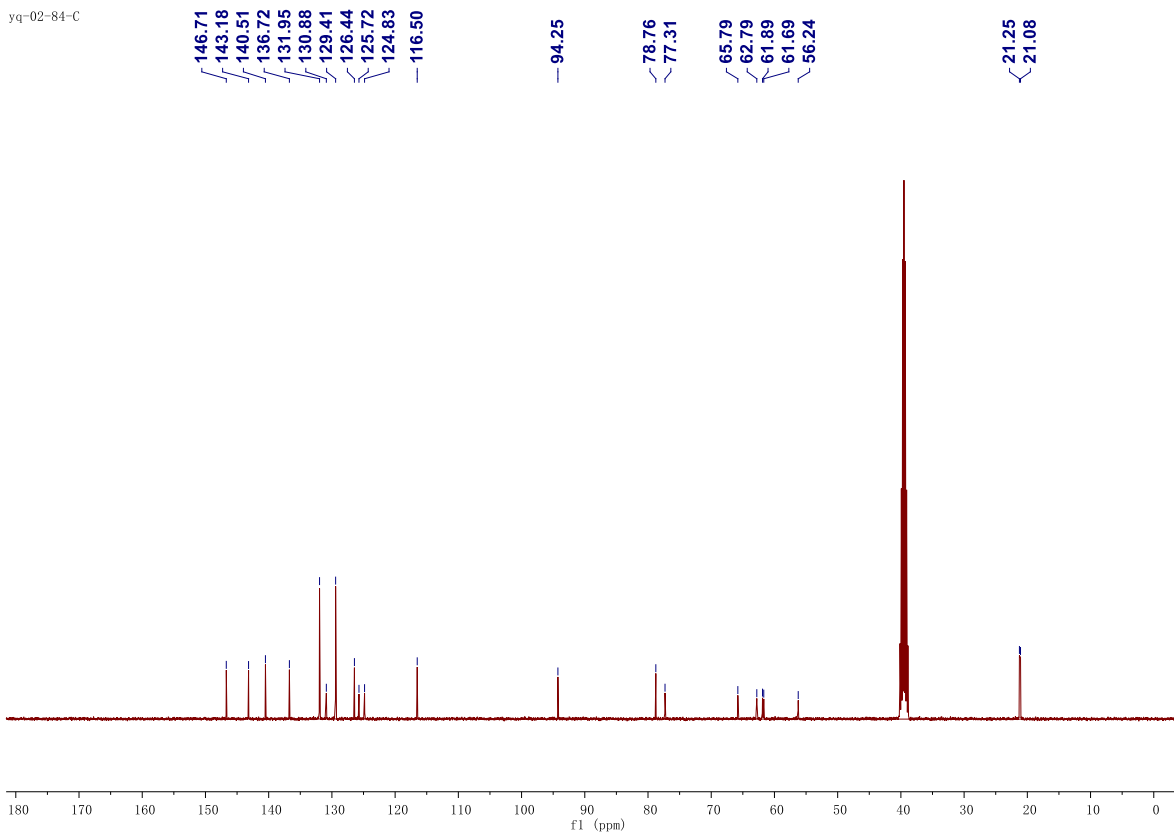



# <sup>1</sup>H NMR

20190821-YQ-OMe-Me

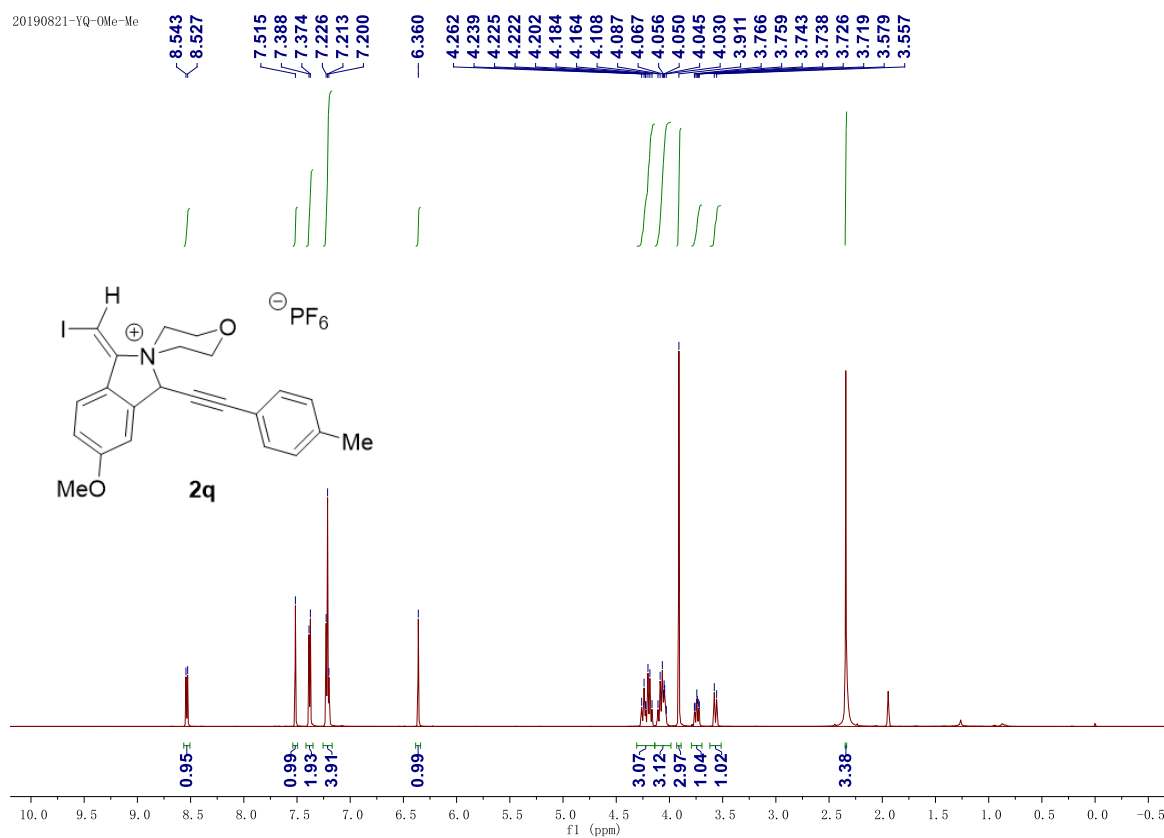

# <sup>13</sup>C NMR

20190821-YQ-OMe-Me-carb

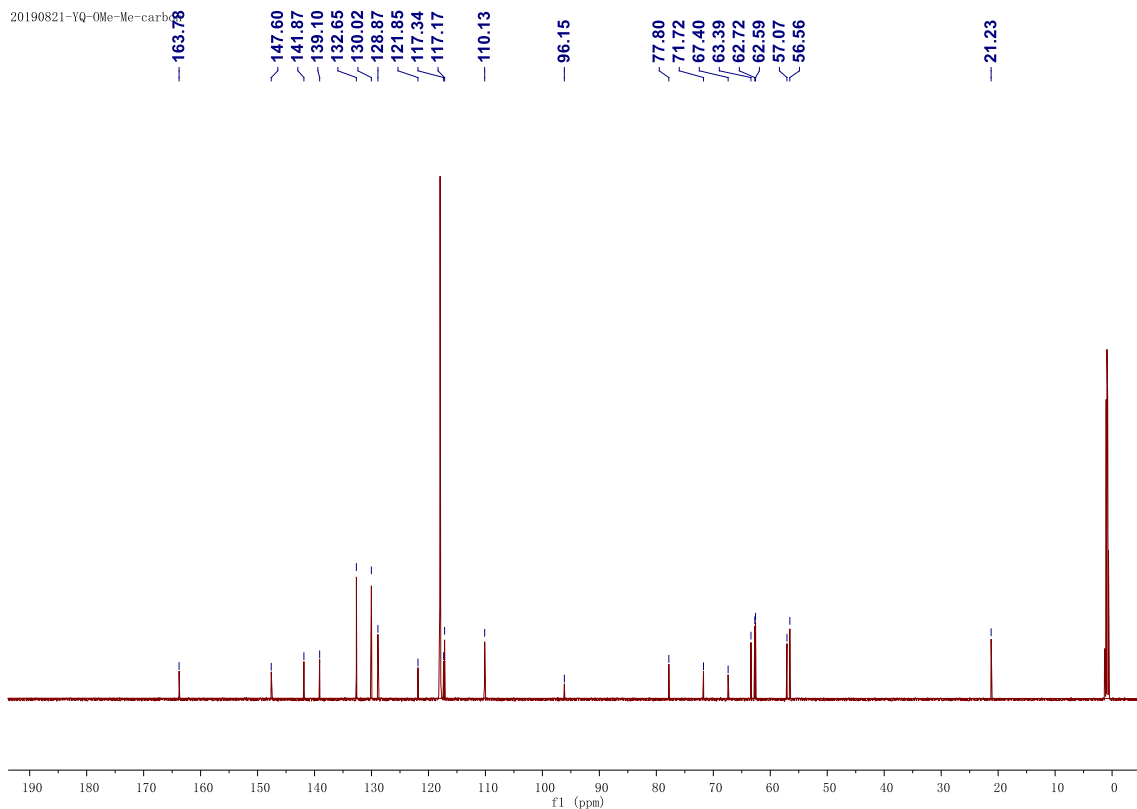

# <sup>1</sup>H NMR

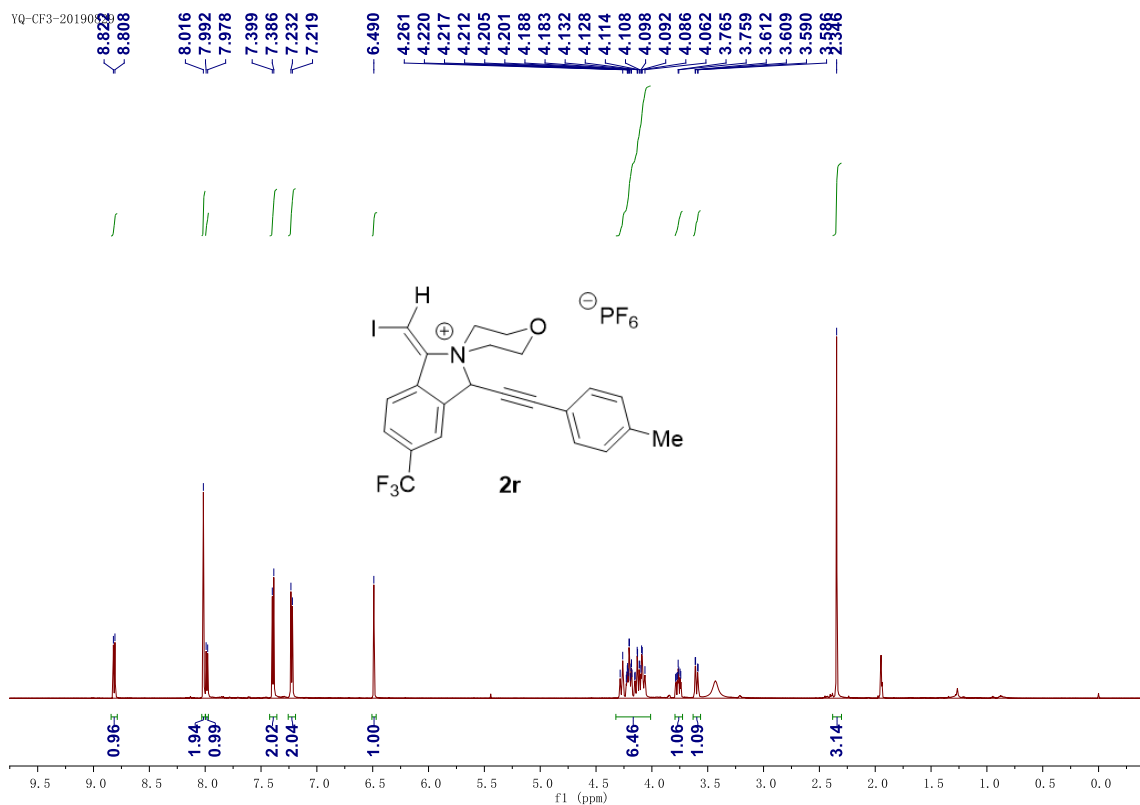

# <sup>13</sup>C NMR

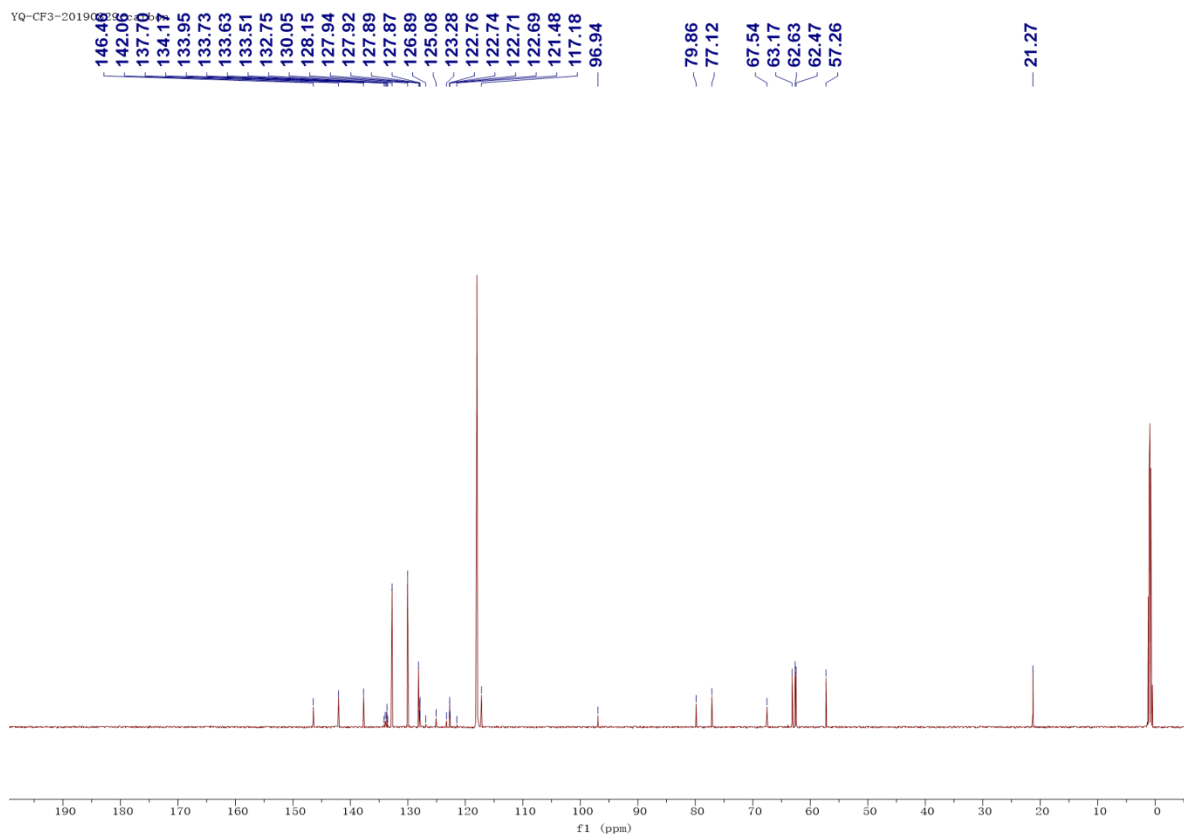

# <sup>1</sup>H NMR

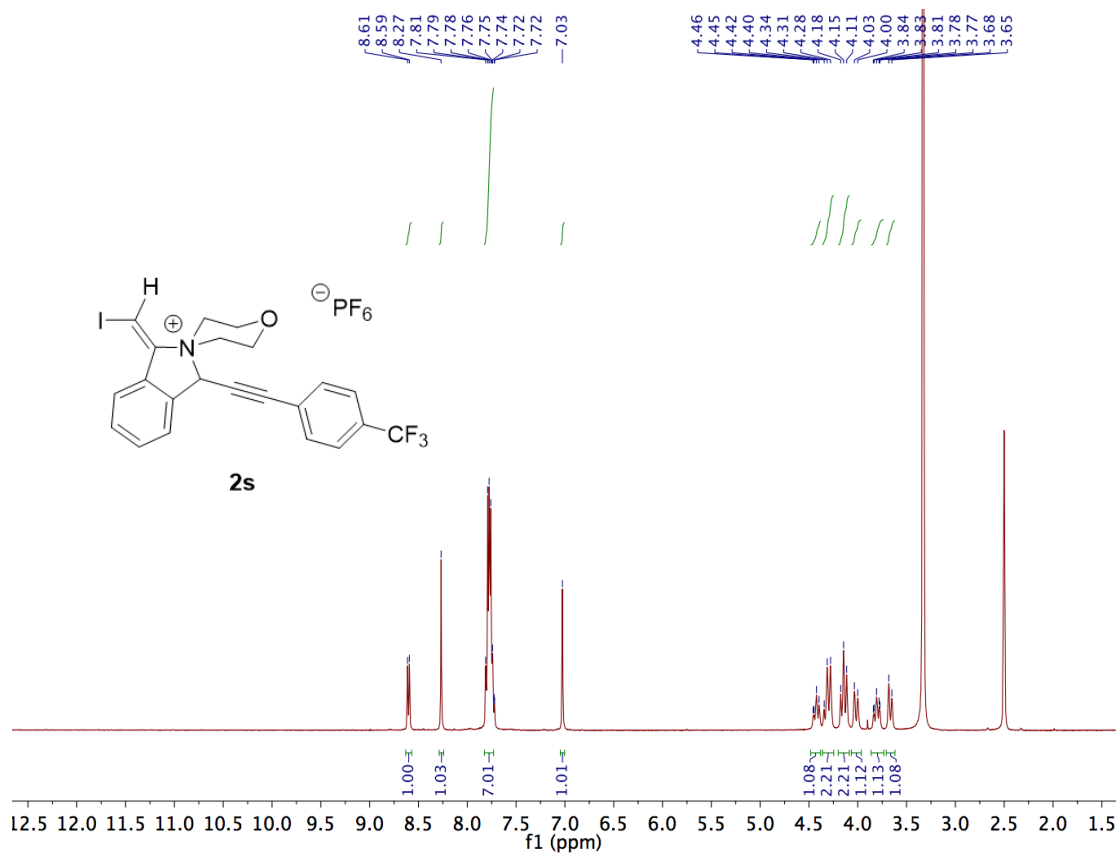

# <sup>13</sup>C NMR

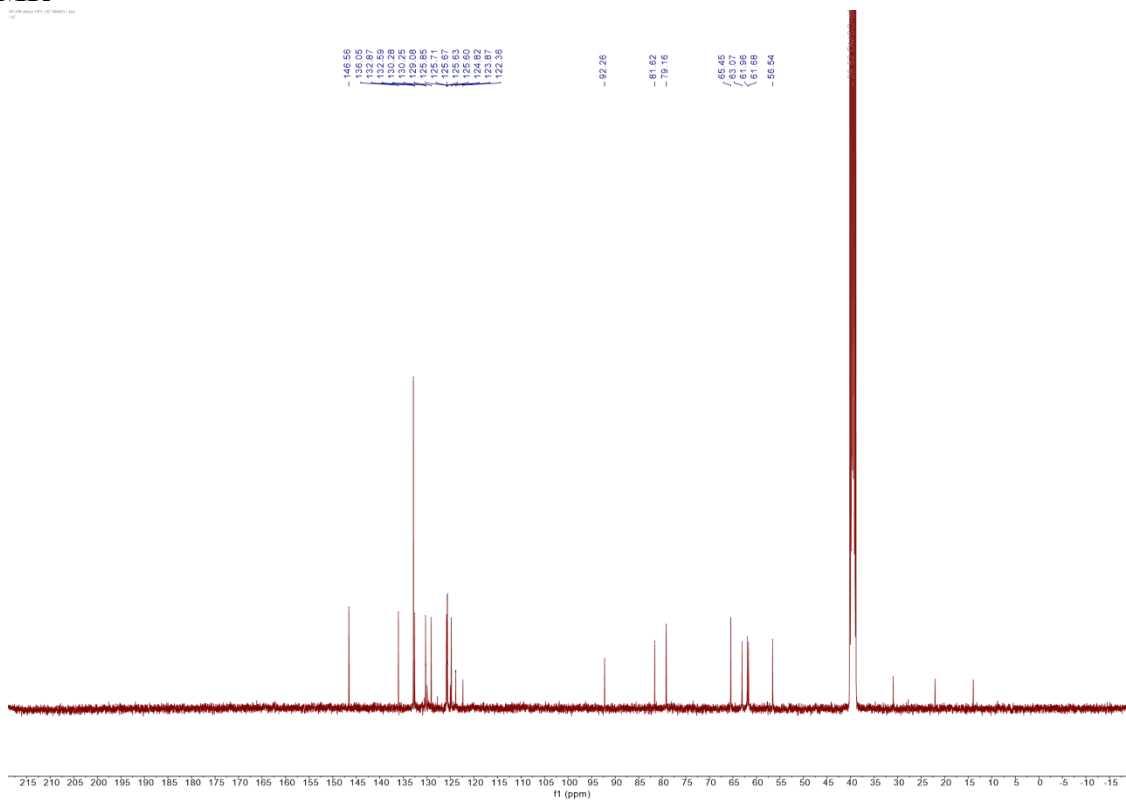

# <sup>1</sup>H NMR

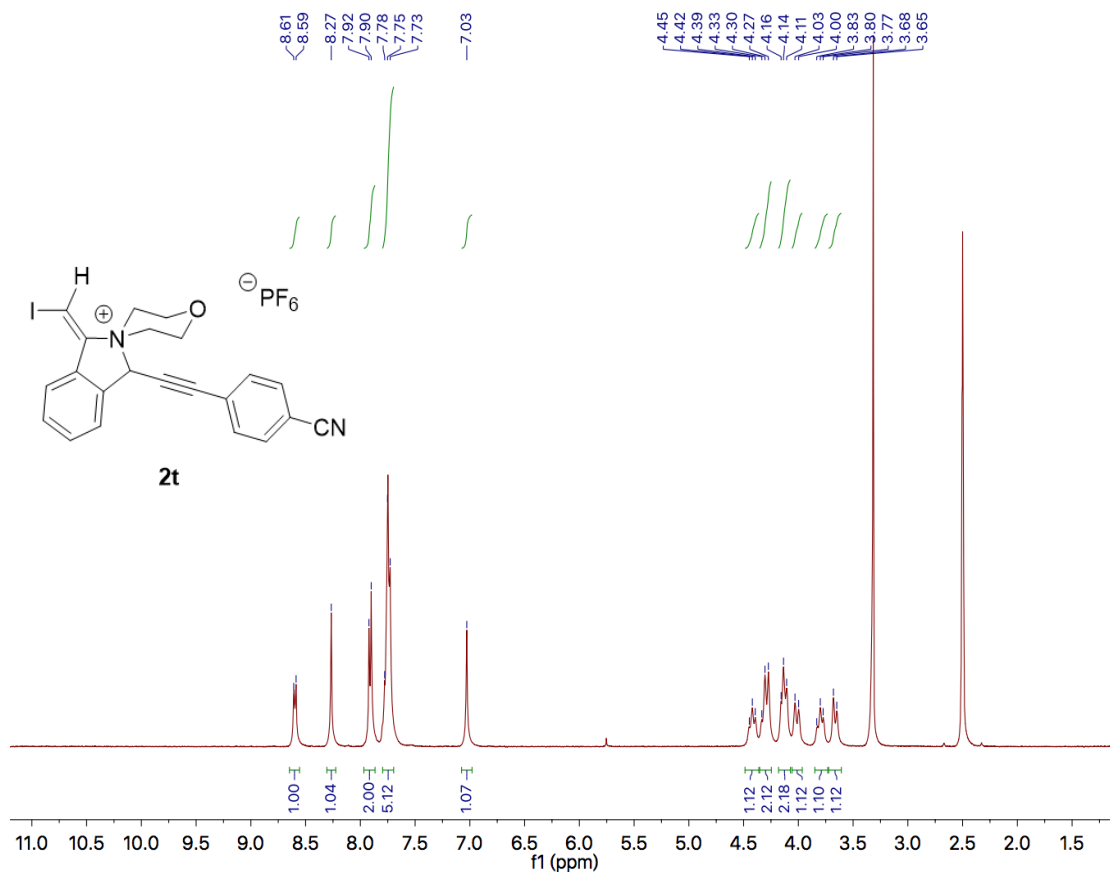

# <sup>13</sup>C NMR

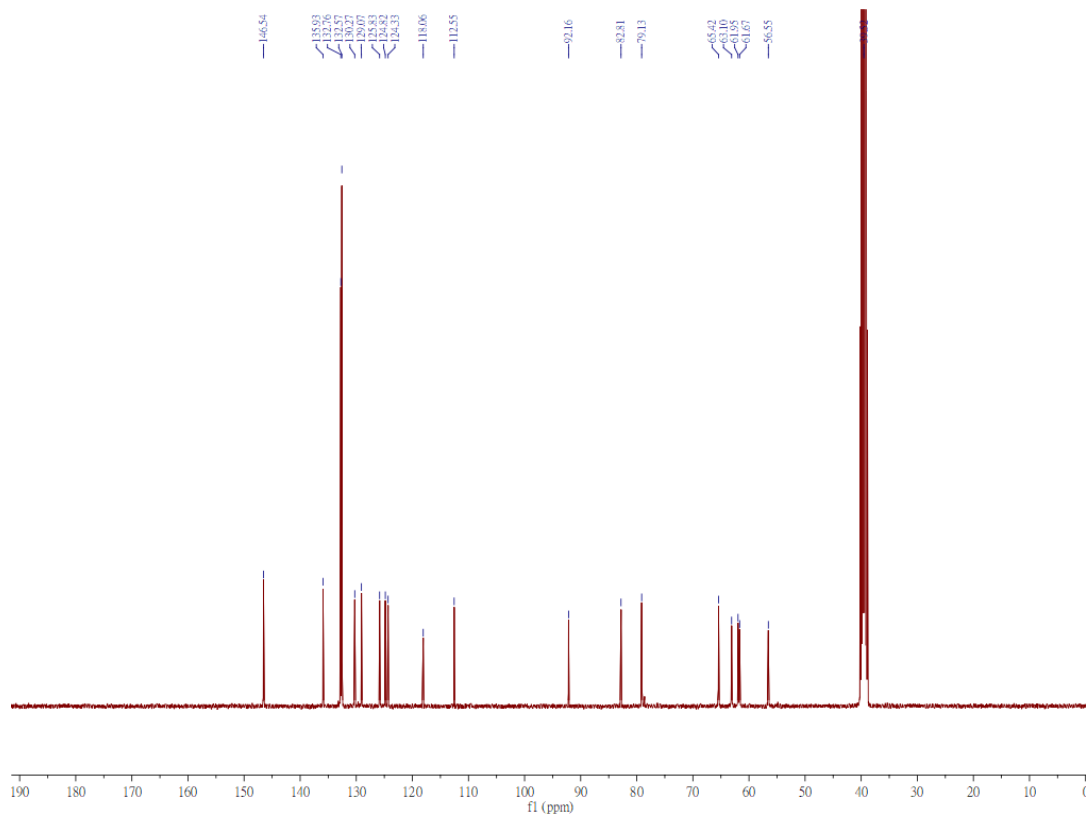

# <sup>1</sup>H NMR

0004 Acquisition 01-06-2016 09:59:11.04

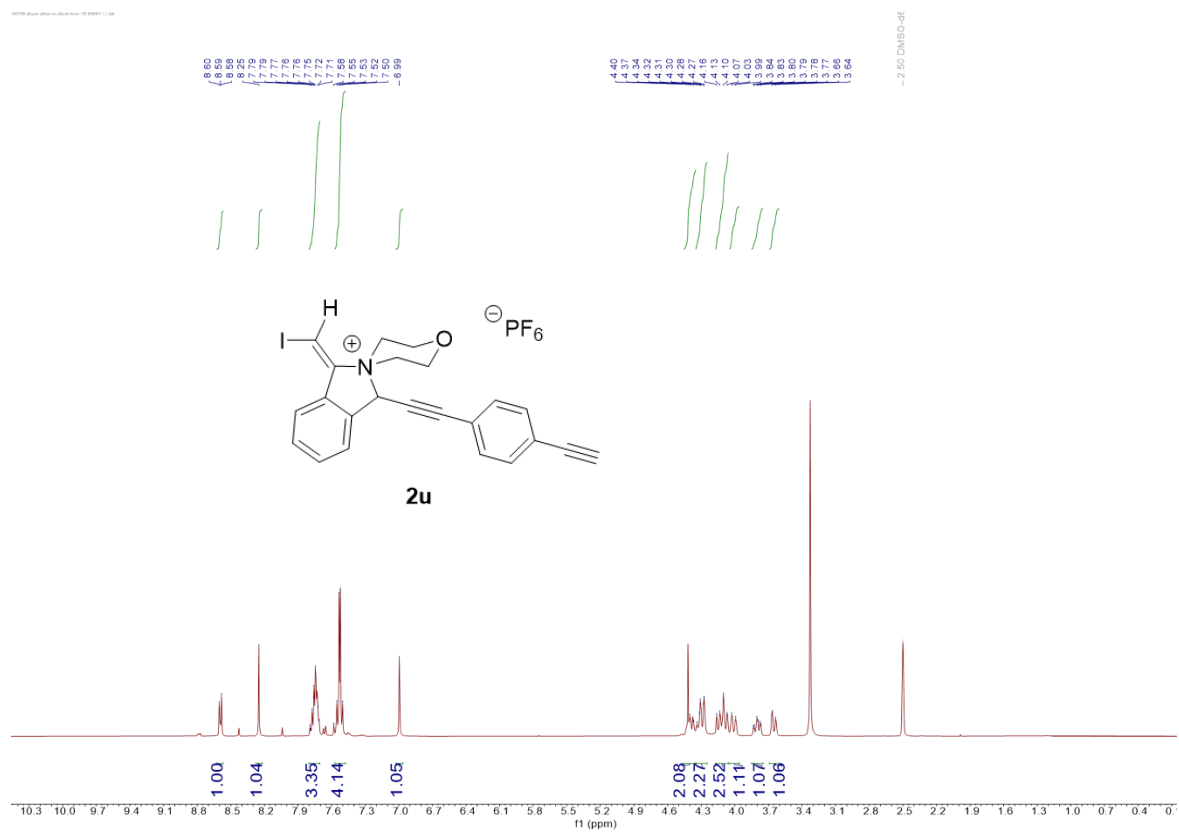

# <sup>13</sup>C NMR

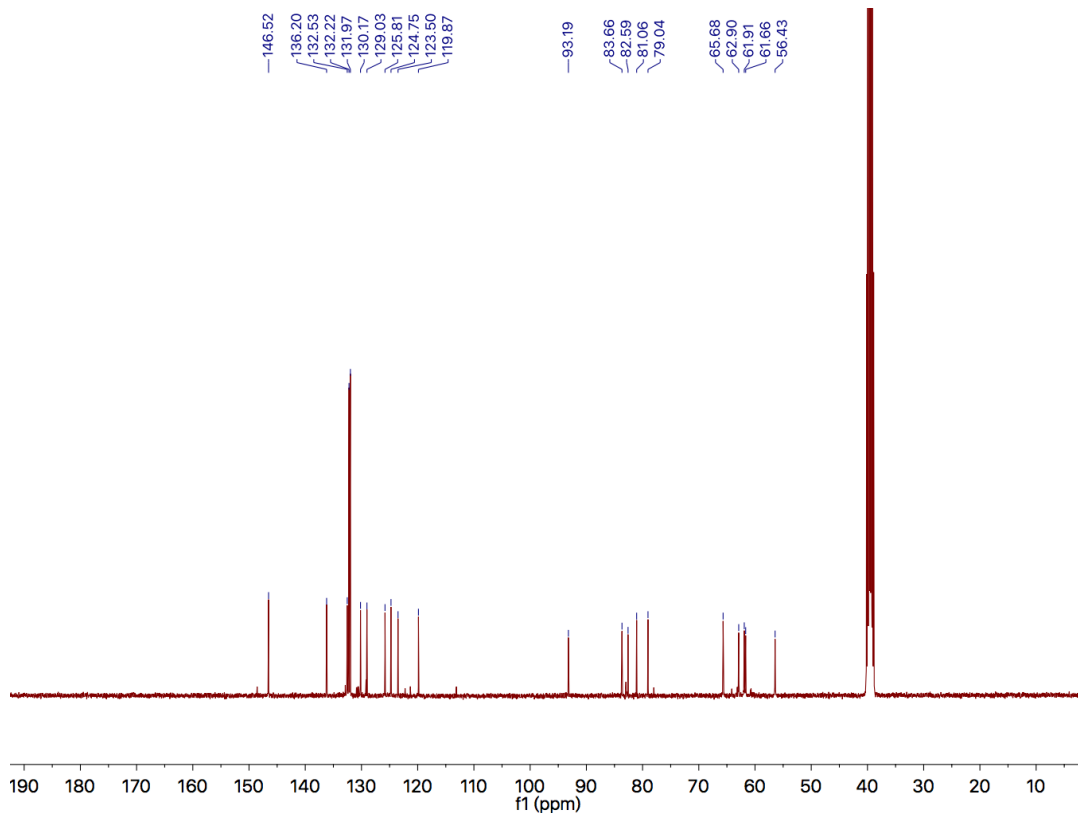

# <sup>1</sup>H NMR

yq-02-123

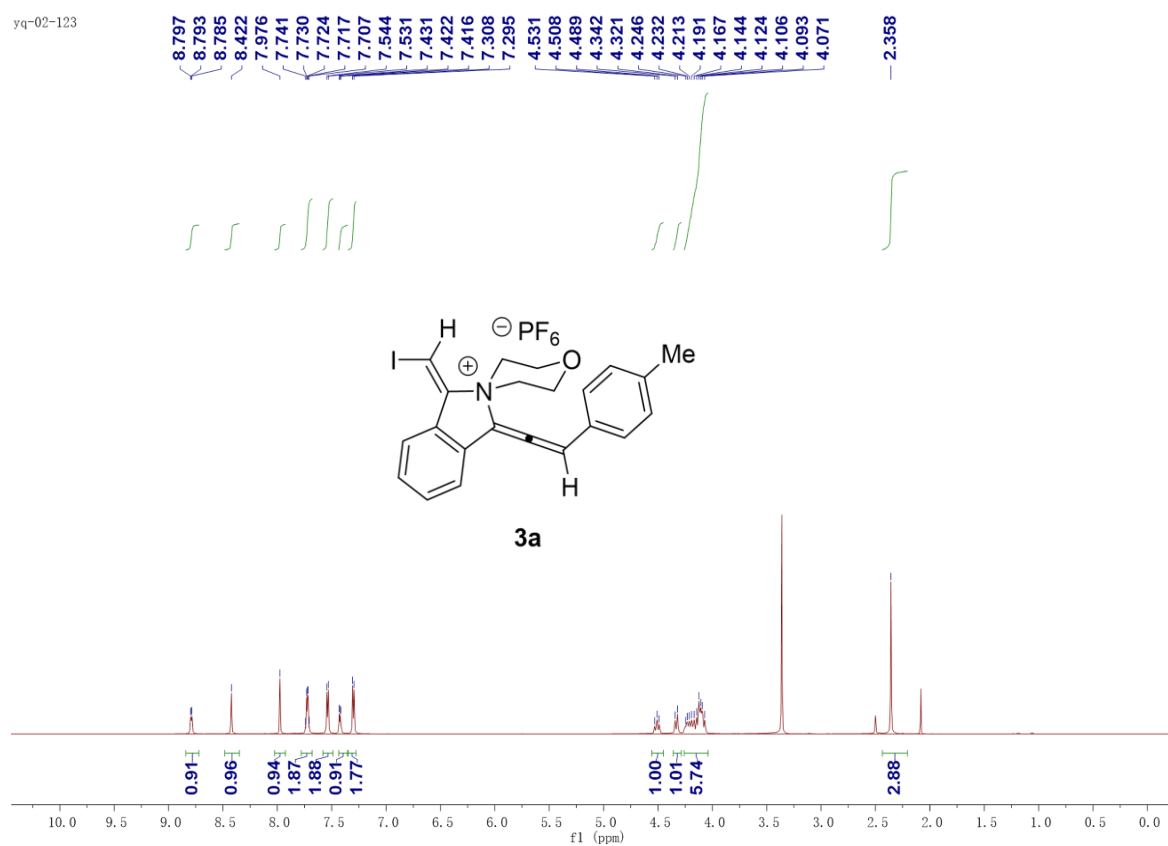

# <sup>13</sup>C NMR

yq-02-123

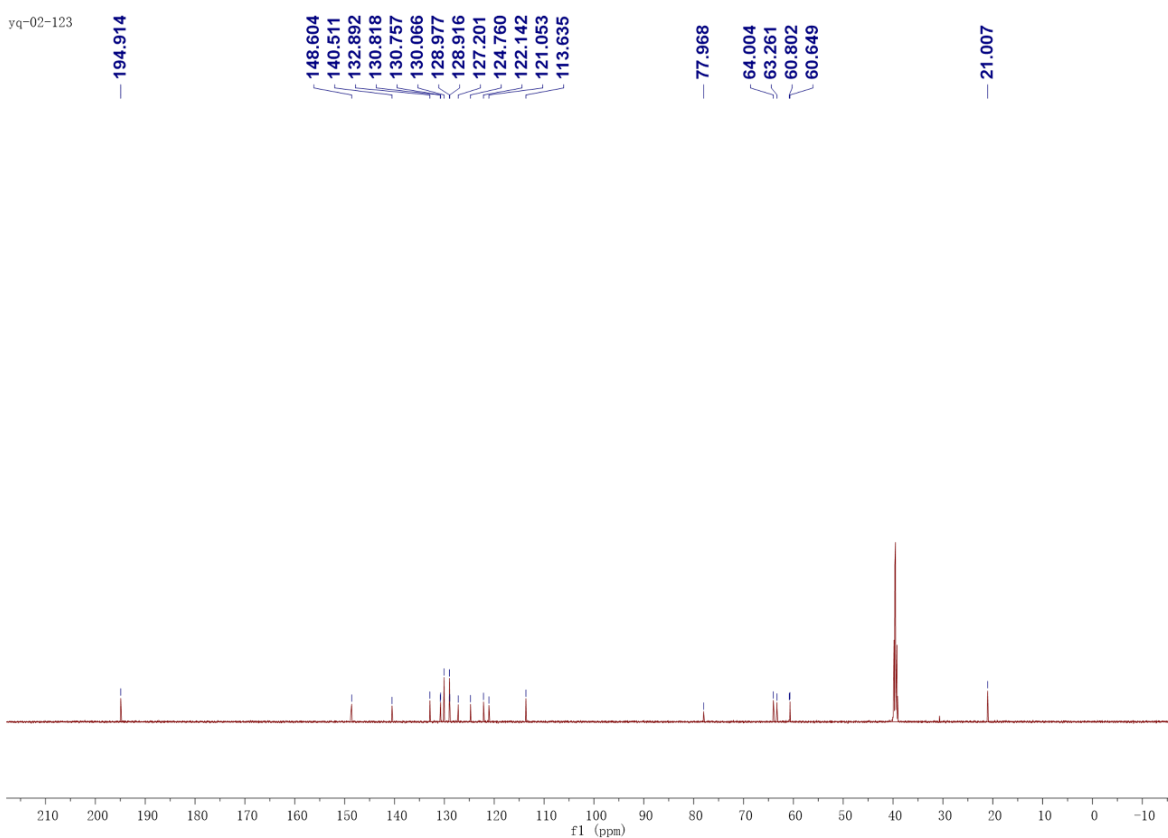

# <sup>1</sup>H NMR

yq-02-130

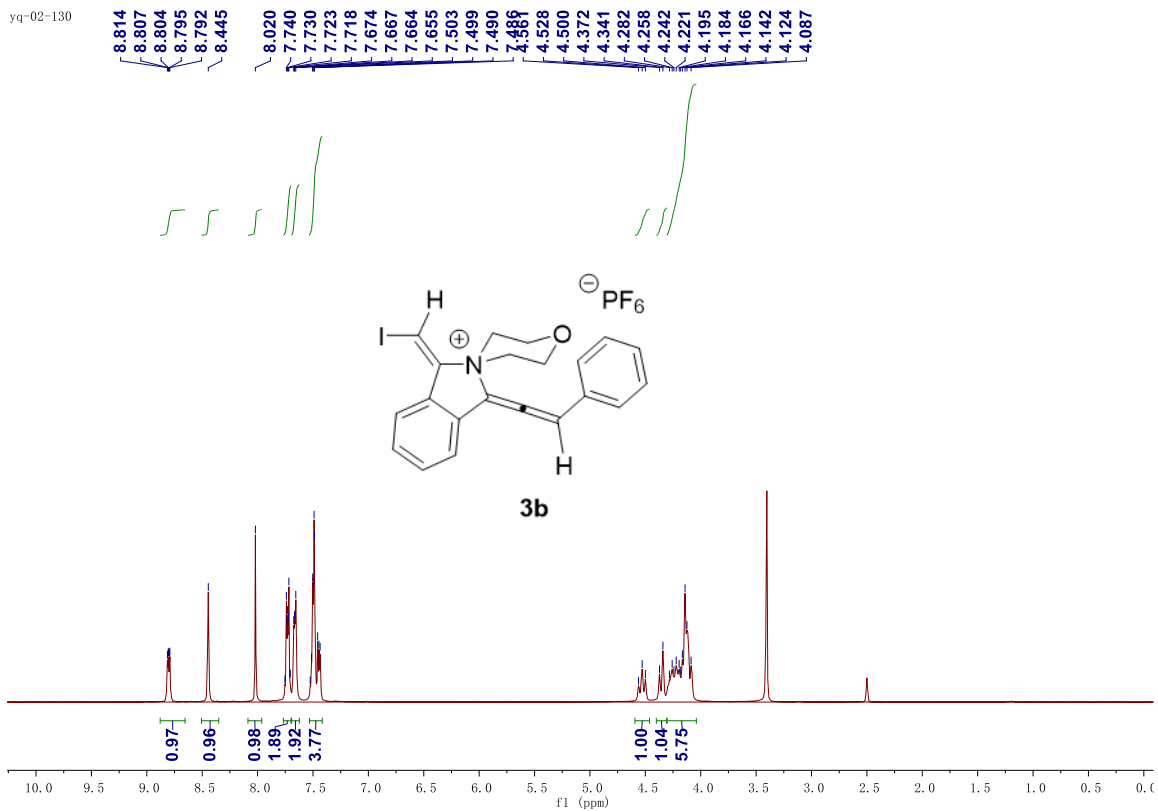

# <sup>13</sup>C NMR

yq-02-130

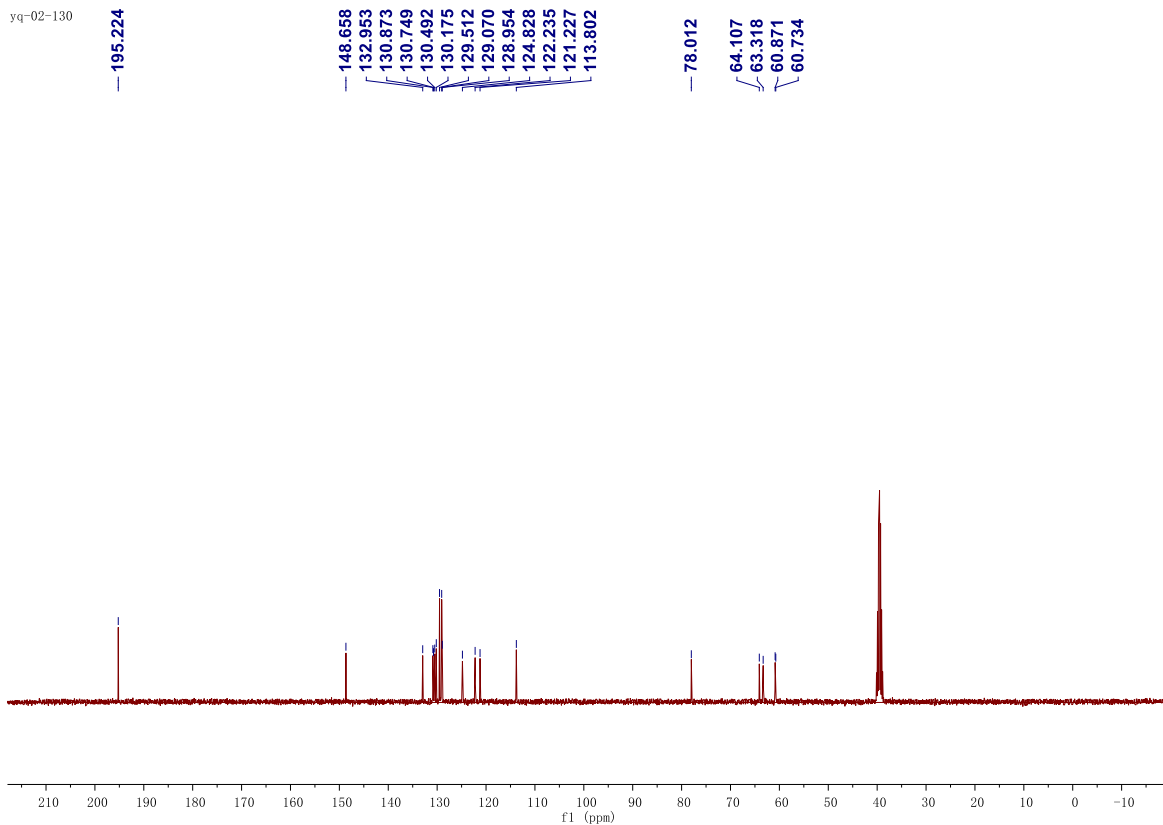

# <sup>1</sup>H NMR

yq-02-03-

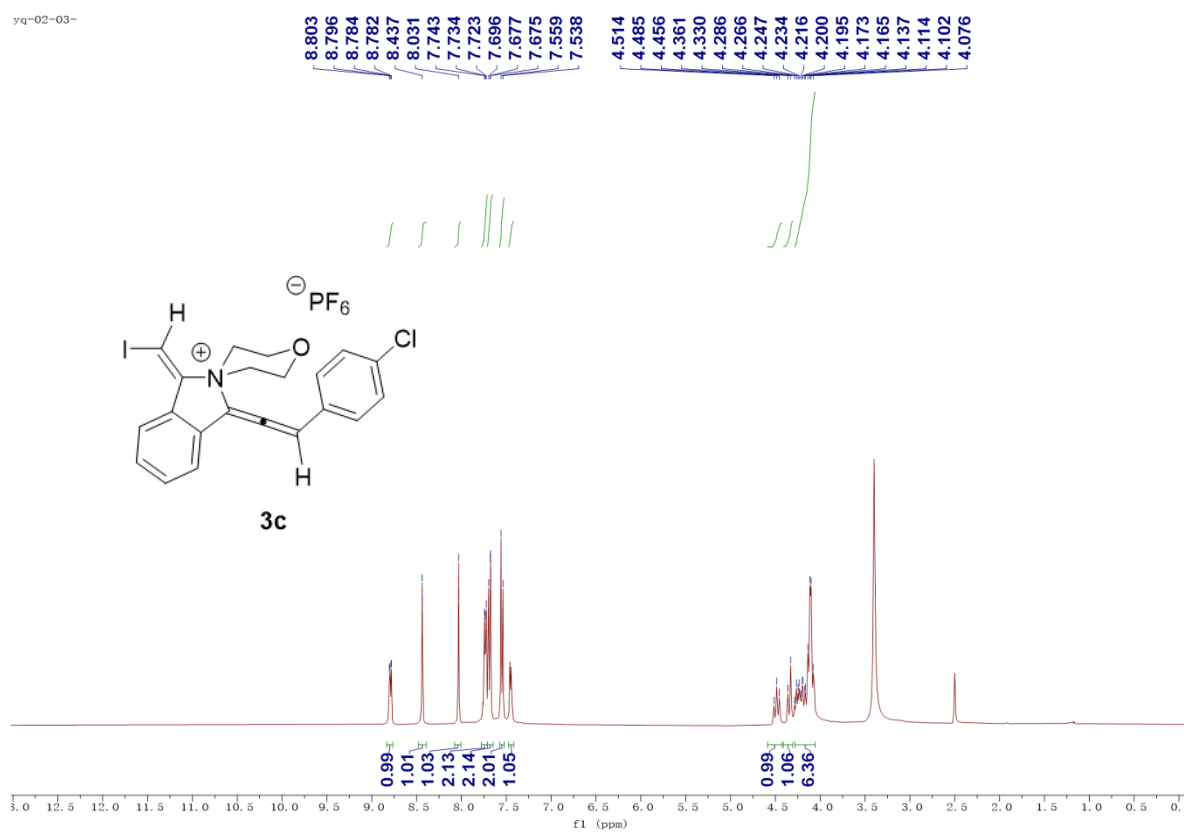

# <sup>13</sup>C NMR

yq-02-03-

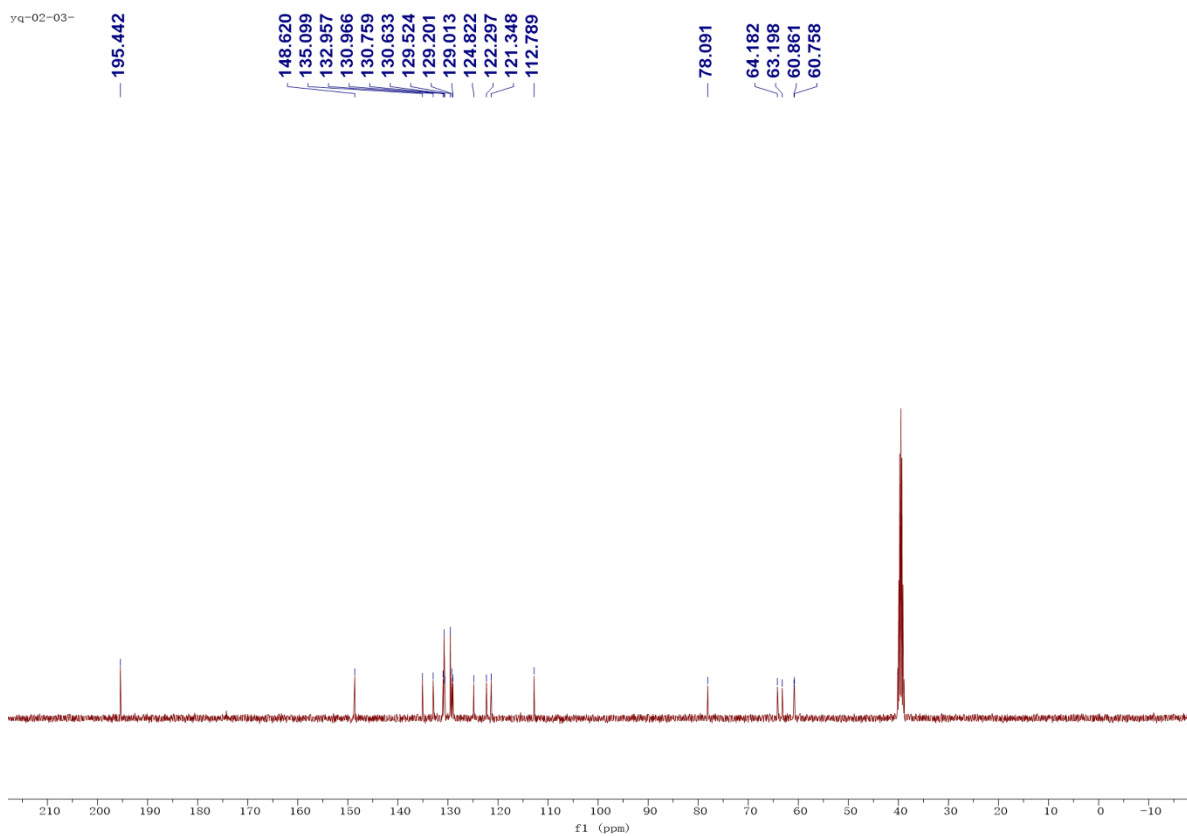



# <sup>1</sup>H NMR

yq-02-128

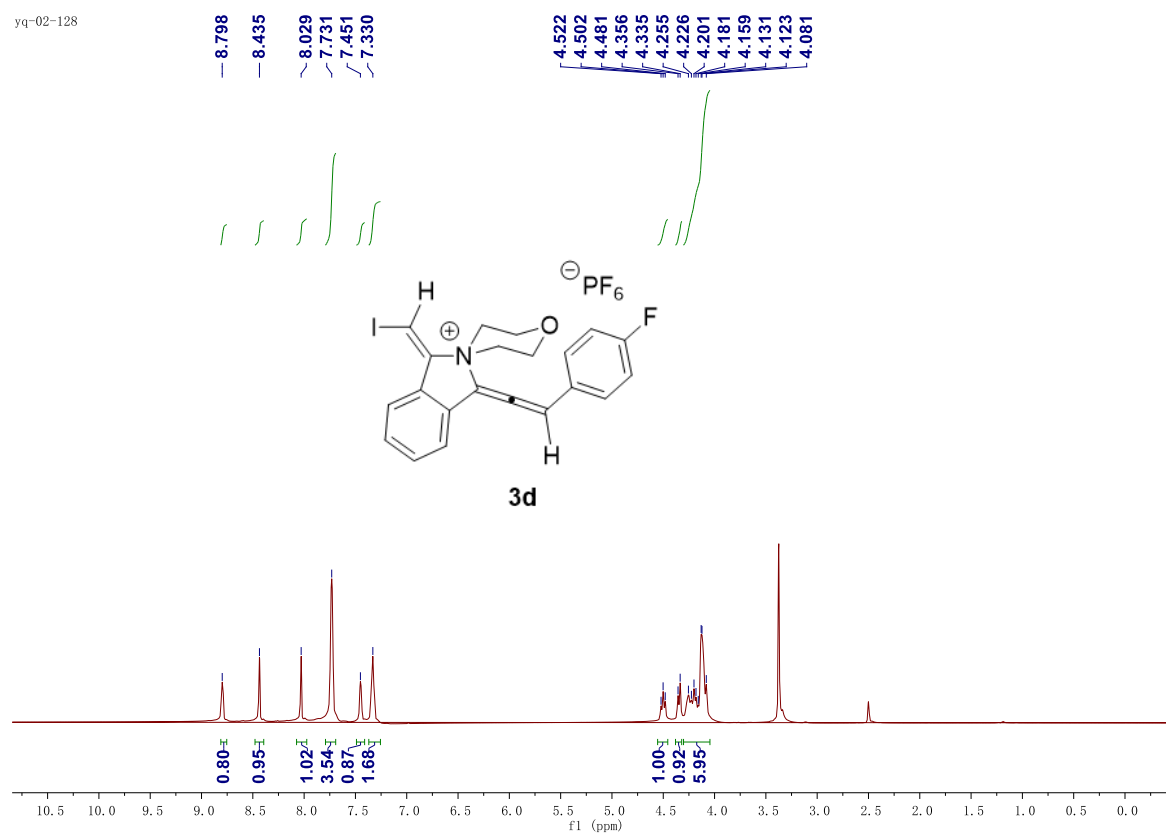

# <sup>13</sup>C NMR

yq-02-128

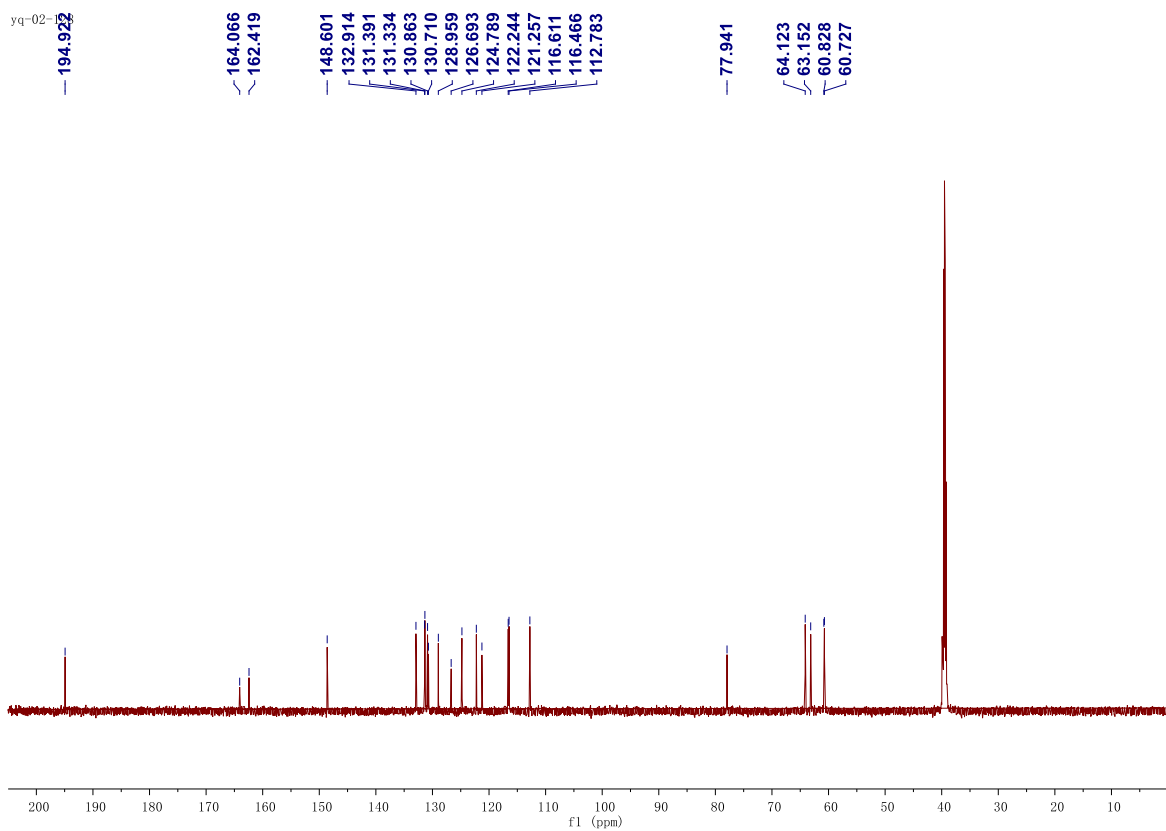

# <sup>1</sup>H NMR

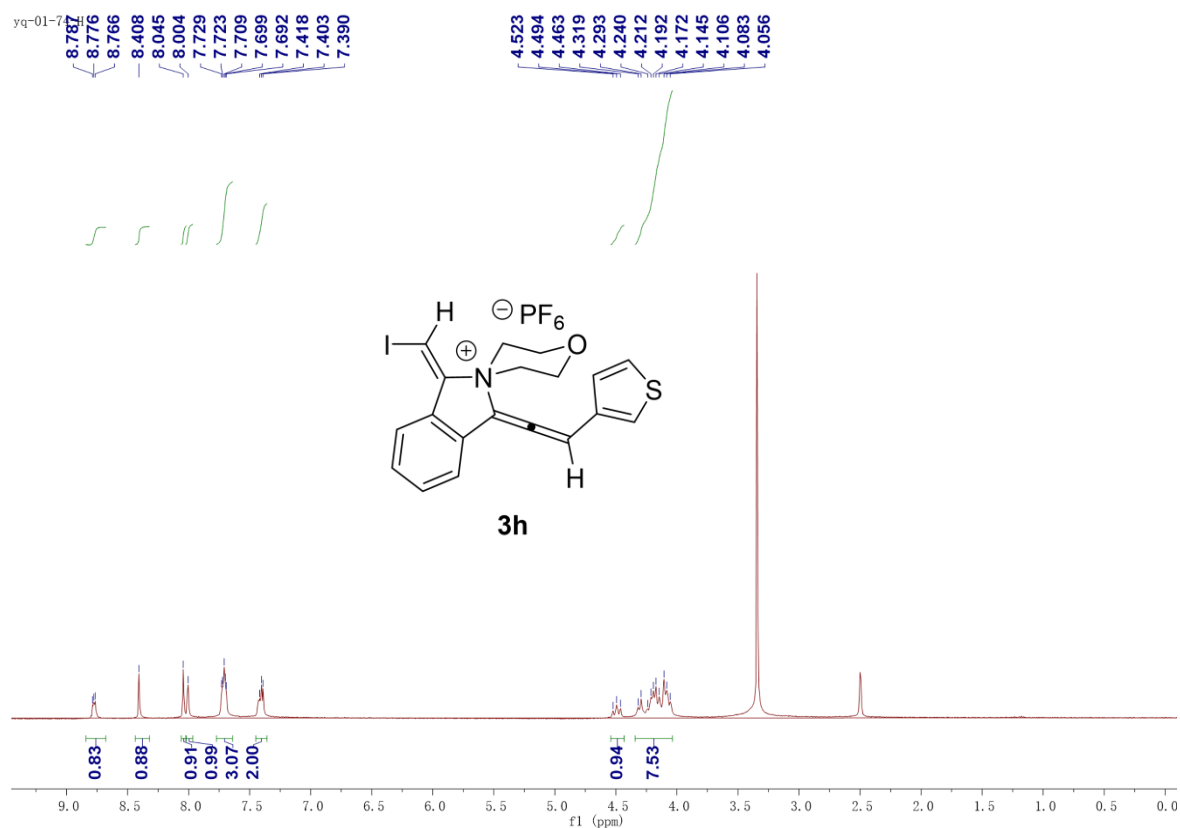

# <sup>13</sup>C NMR

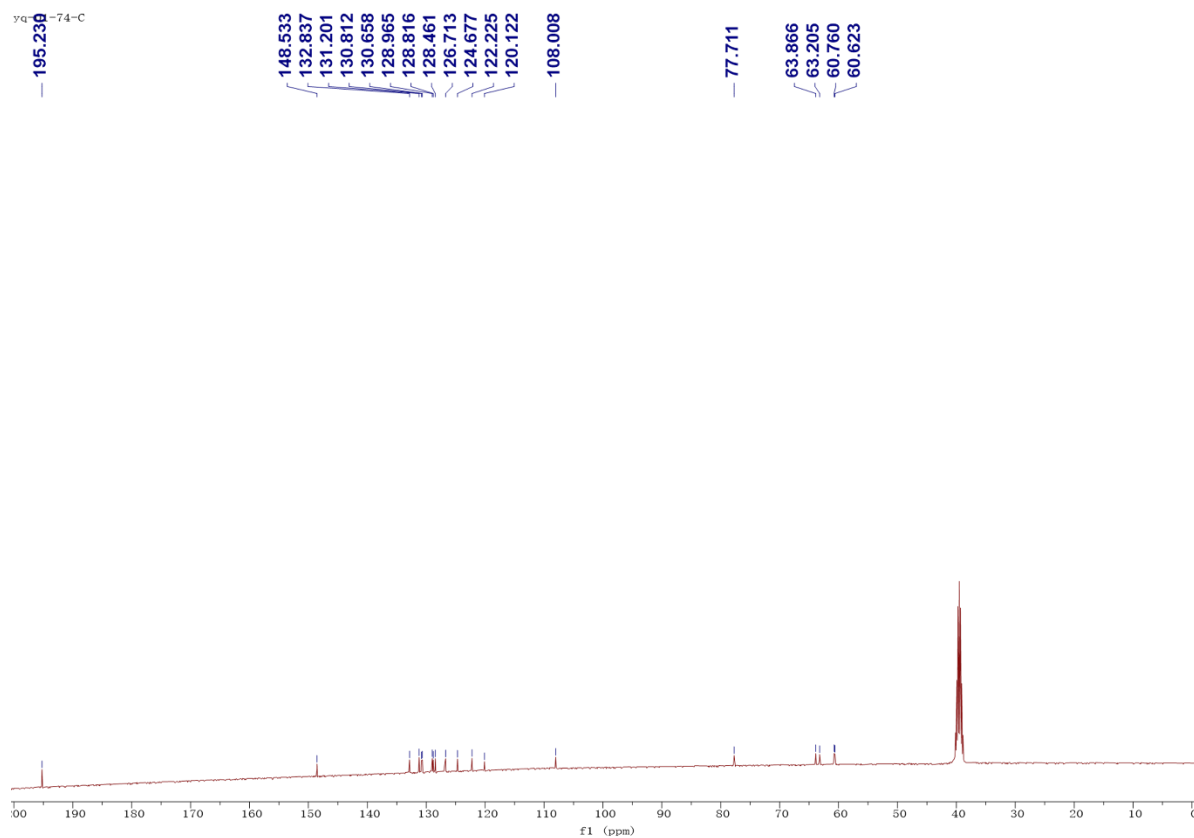

# <sup>1</sup>H NMR

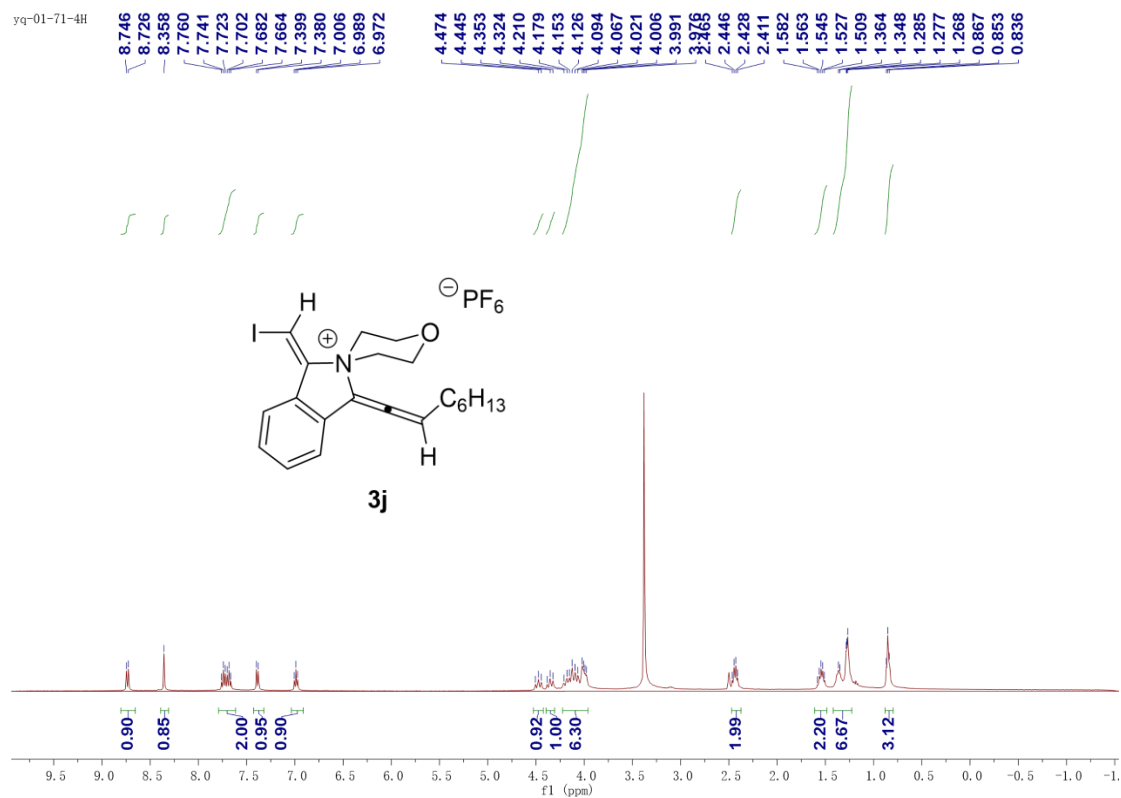

# <sup>13</sup>C NMR

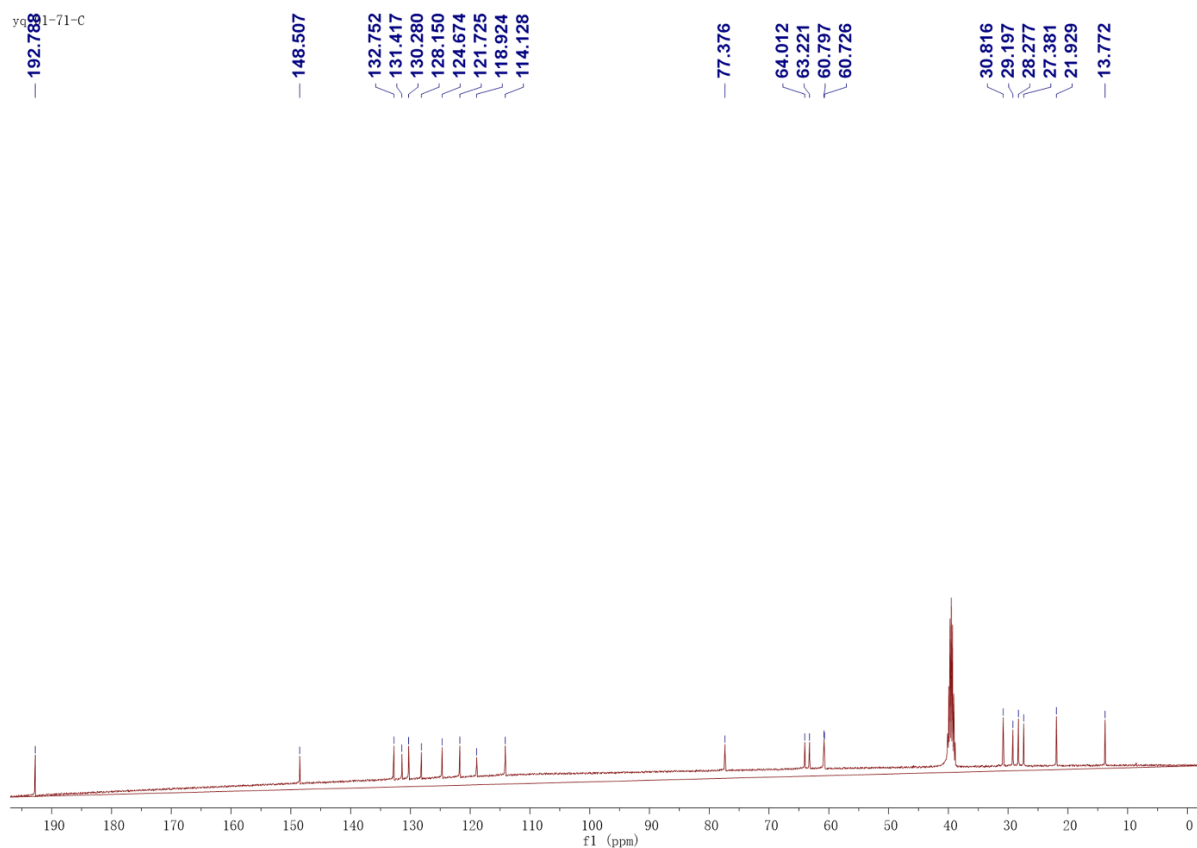

# <sup>1</sup>H NMR

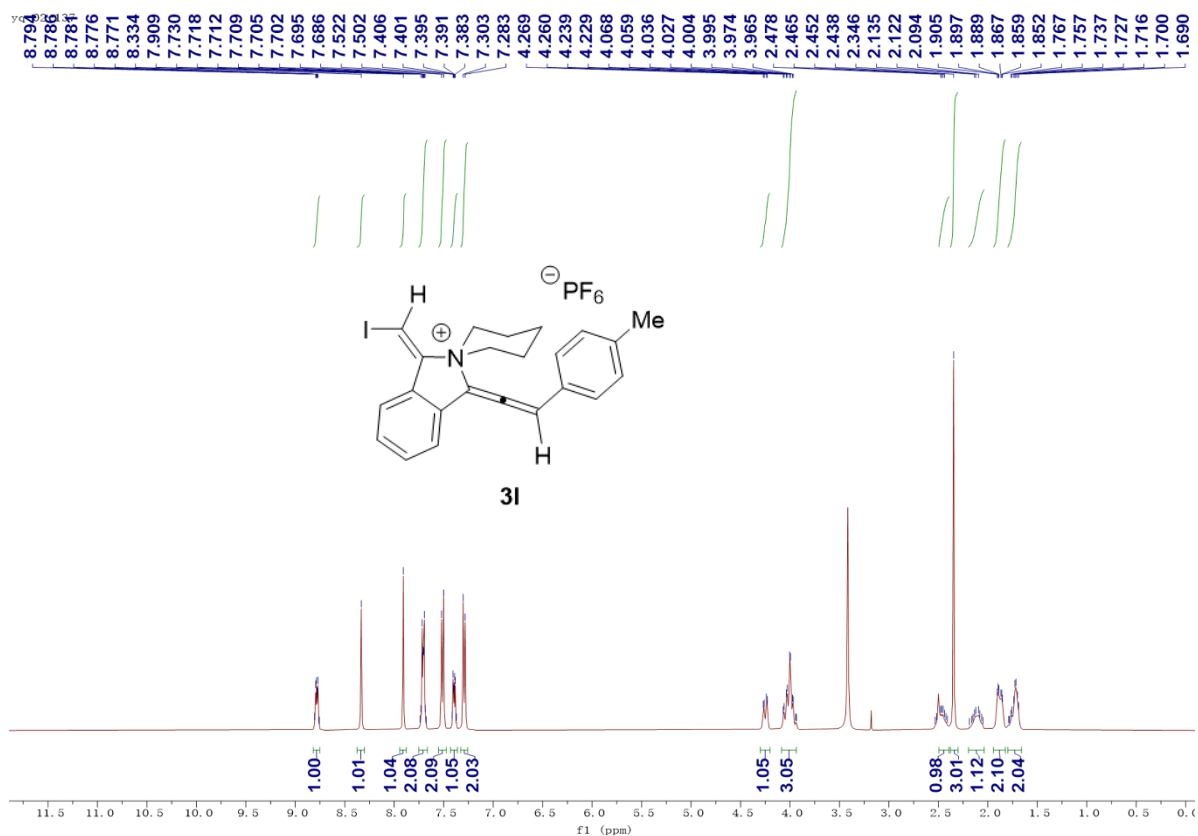

# <sup>13</sup>C NMR

yq-02-137

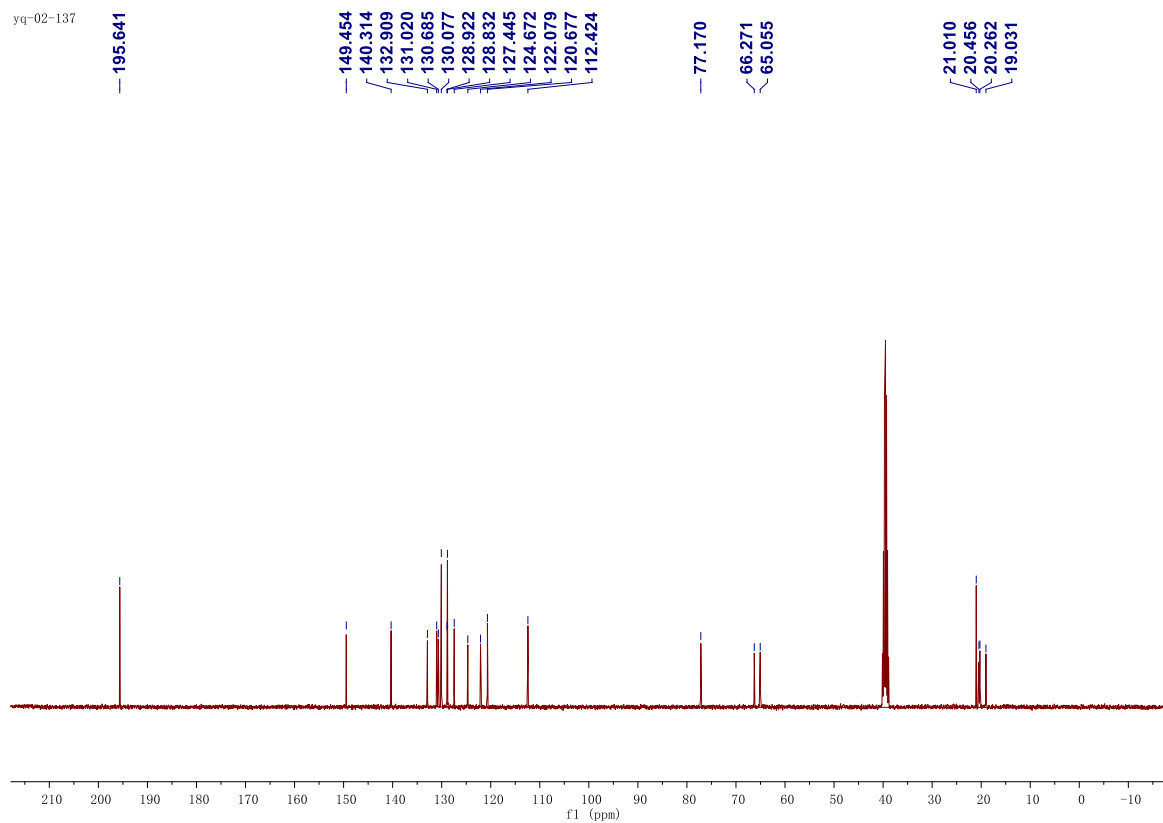

# <sup>1</sup>H NMR

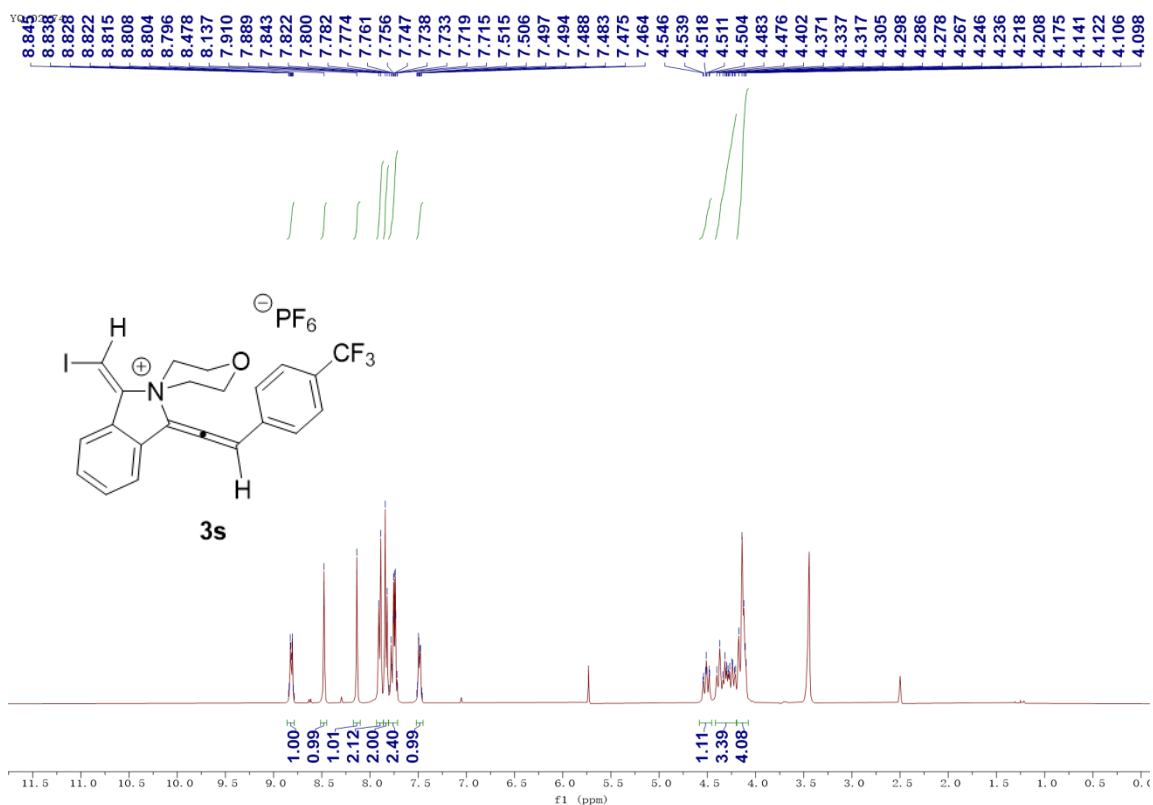

# <sup>13</sup>C NMR

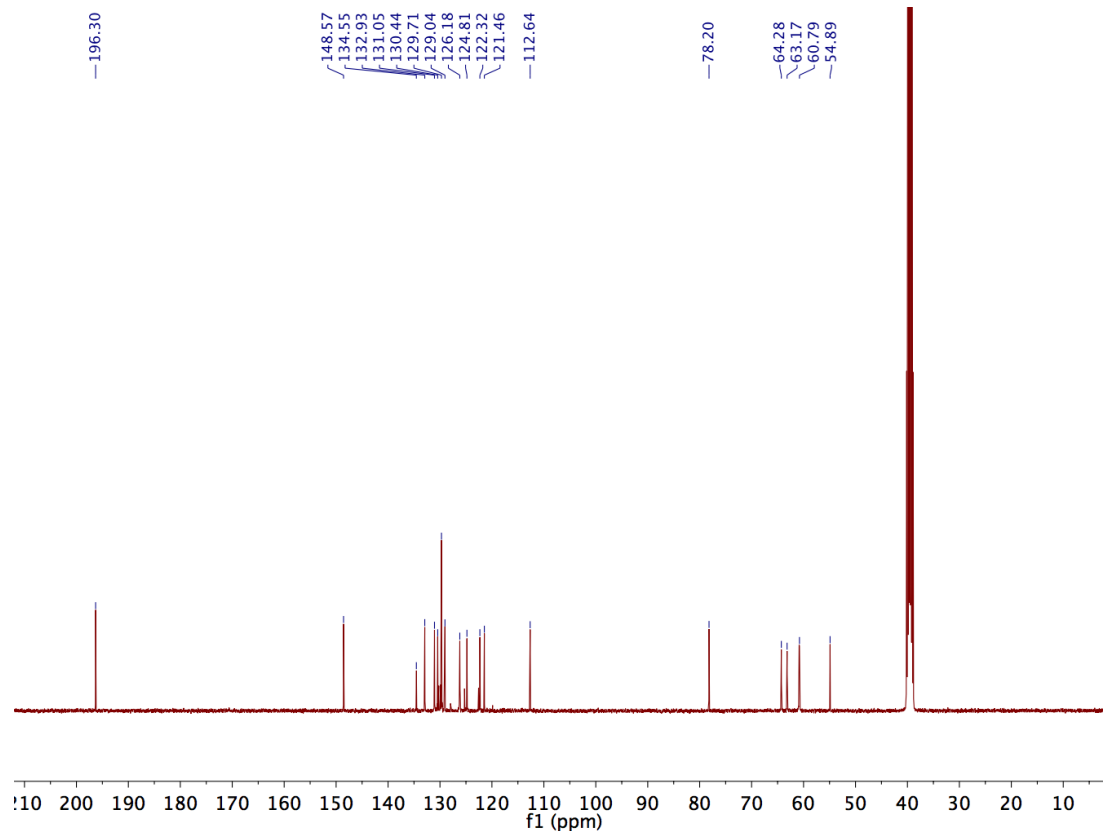

# <sup>1</sup>H NMR

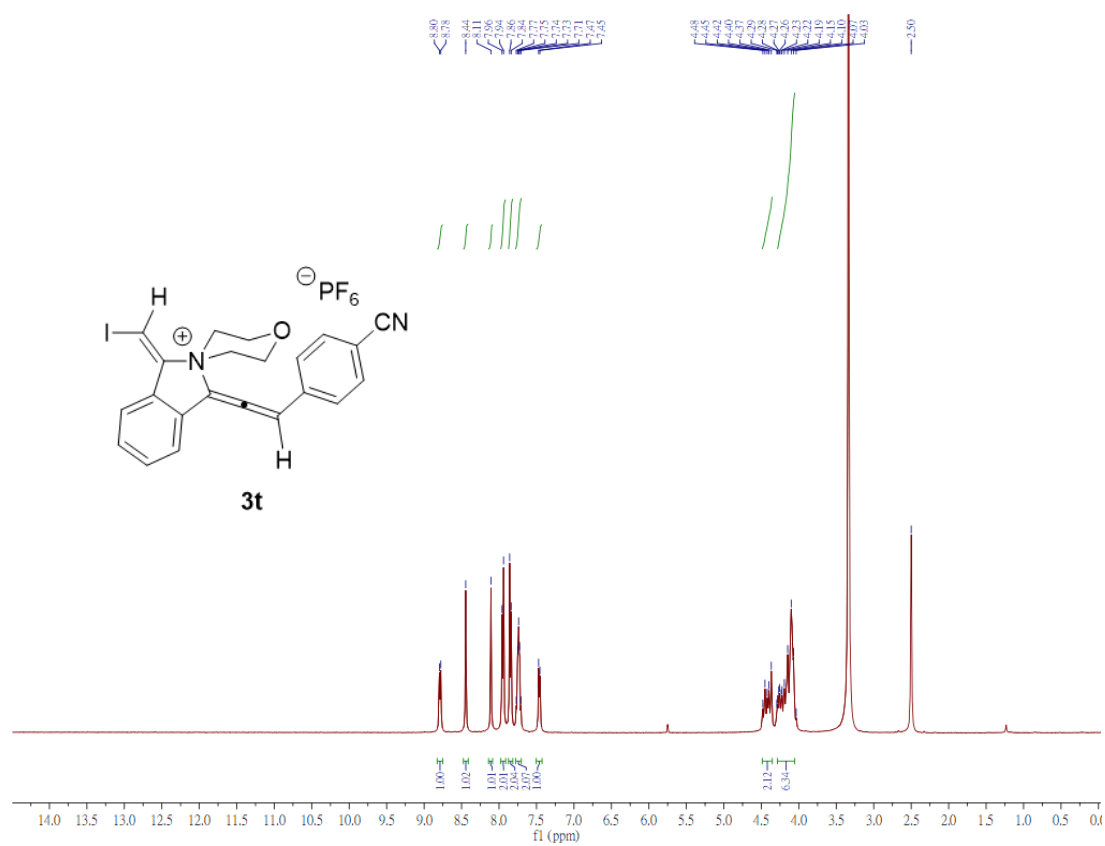

# <sup>13</sup>C NMR

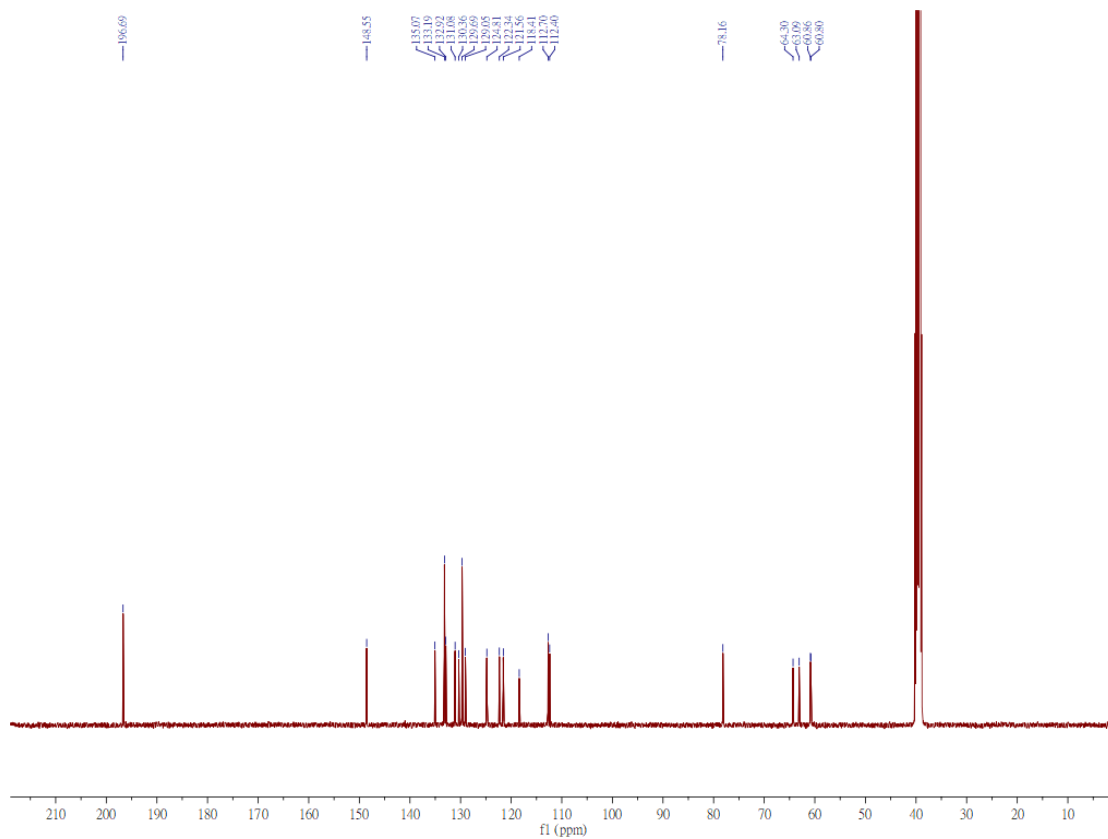

# <sup>1</sup>H NMR

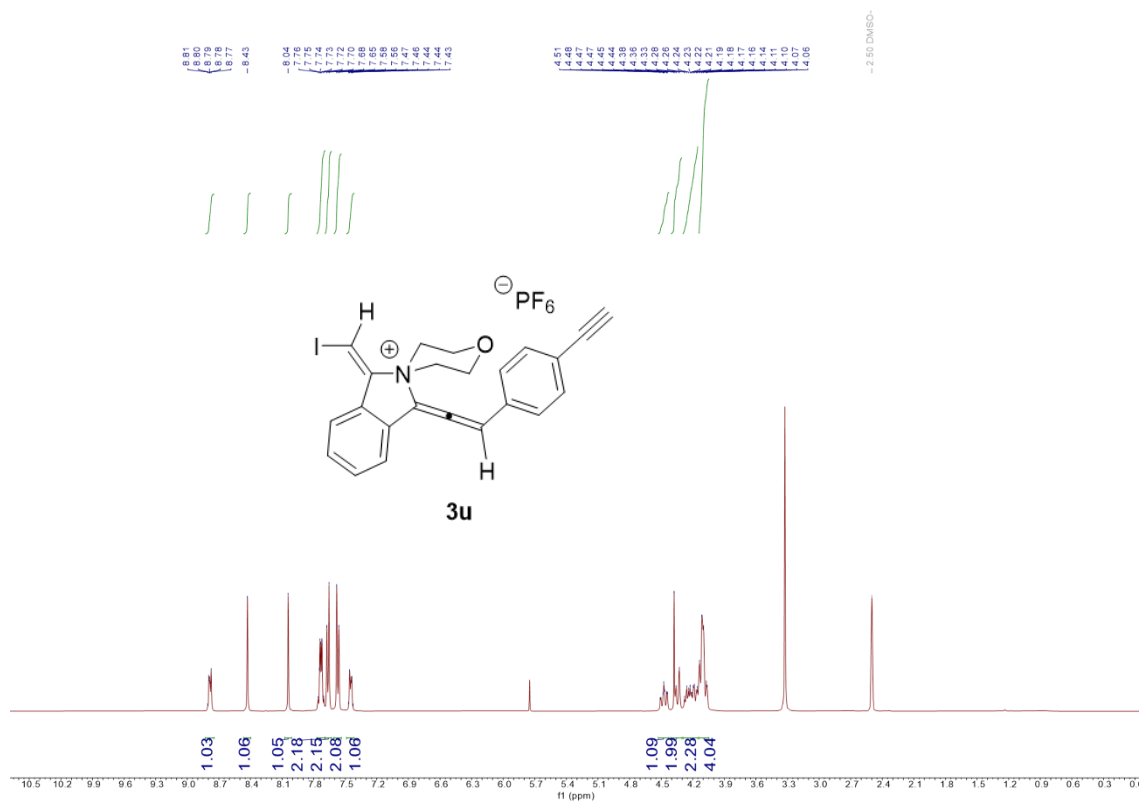

# <sup>13</sup>C NMR

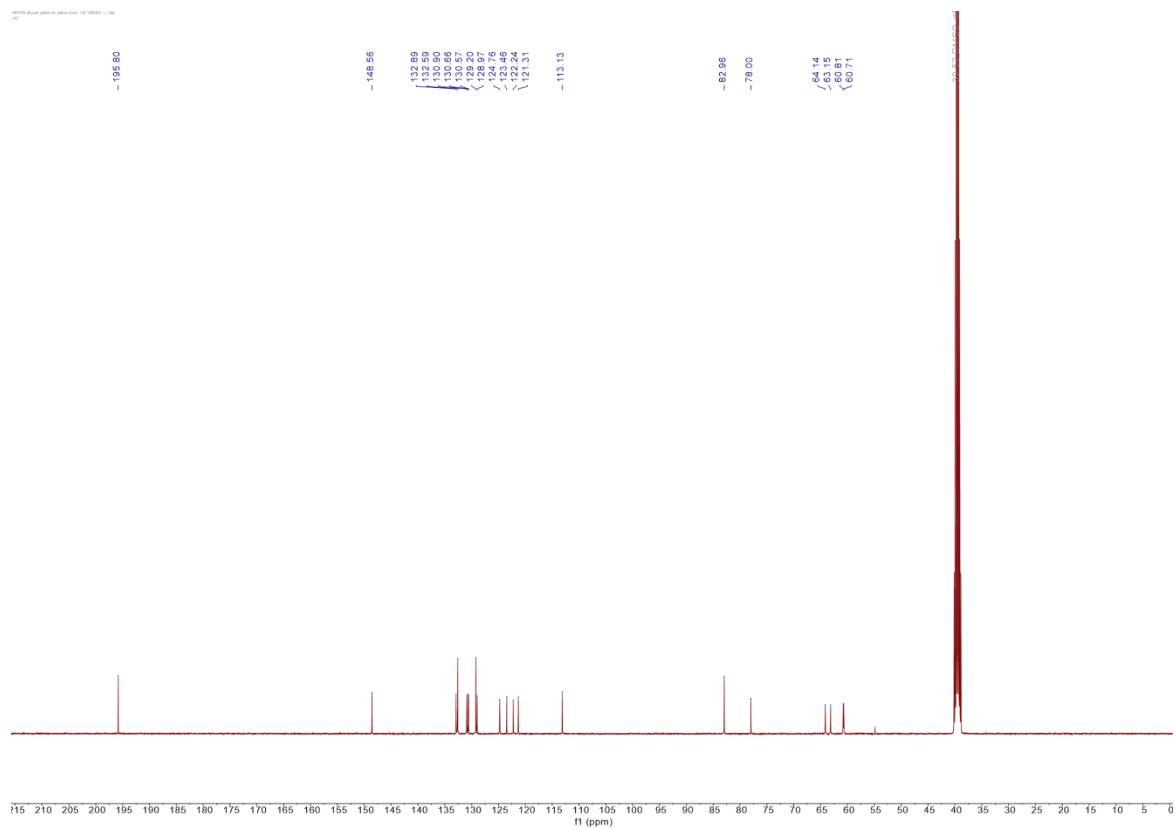

# <sup>19</sup>F NMR

cj13-052-1-deTMS-F  
Standard 19F 03 Nov 2016

-110.902

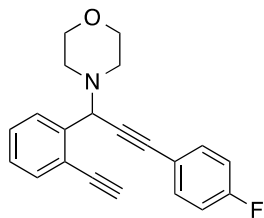

1d

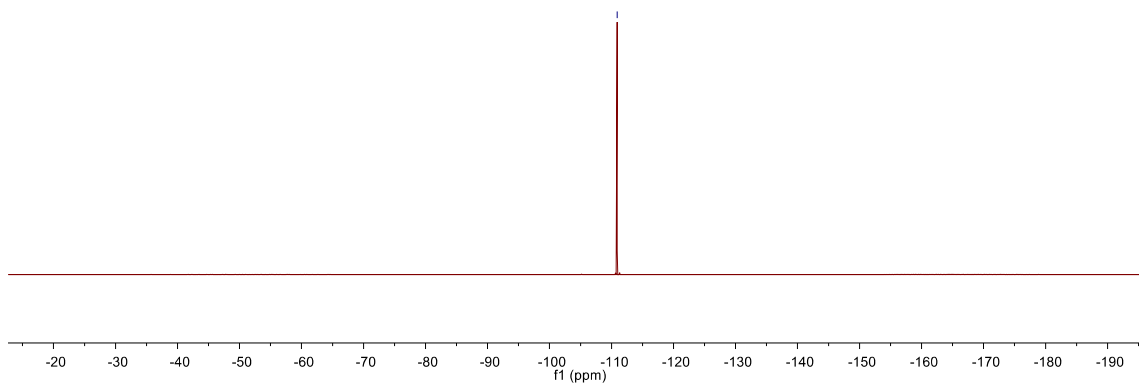

# <sup>19</sup>F NMR

cj13-058-1-deTMS-F  
Standard 19F 03 Nov 2016

-62.699

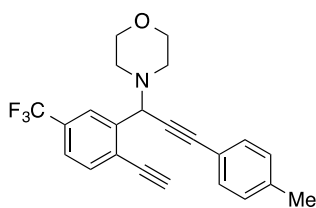

1r

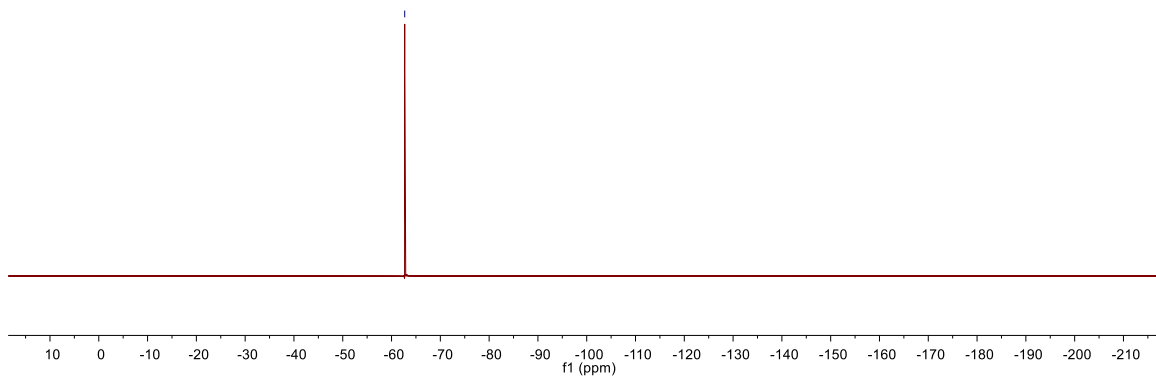



# <sup>19</sup>F NMR

cyj12-002-deTMS-F.1.fid

-62.768

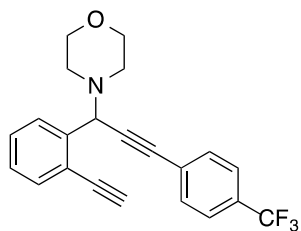

1s

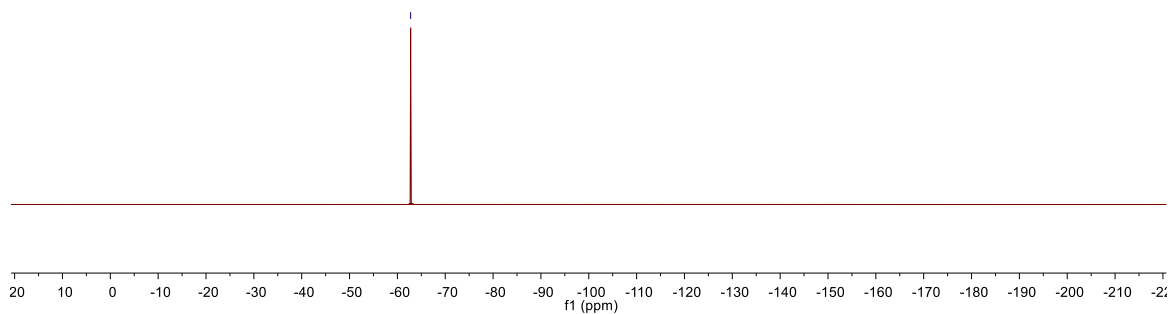

# <sup>19</sup>F NMR

YQ-F-20190707-F19

-72.116  
-73.368

-109.100

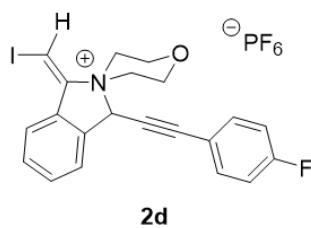

2d

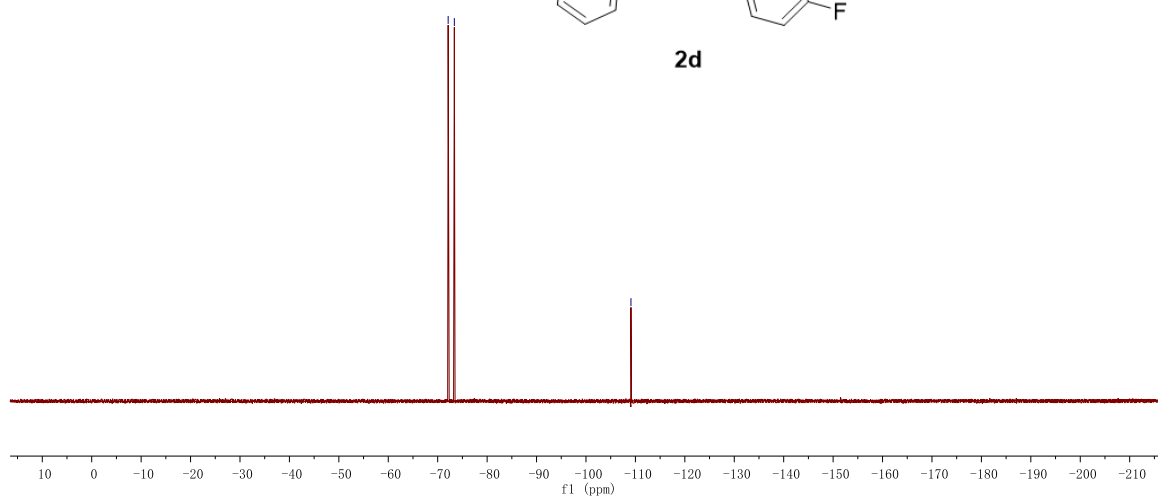

# <sup>19</sup>F NMR

YQ-CF3-20190829-F

— -63.35  
~ -72.08  
~ -73.33

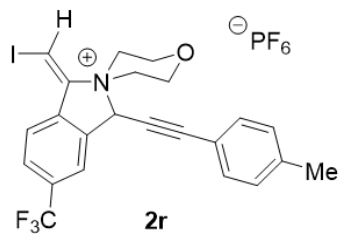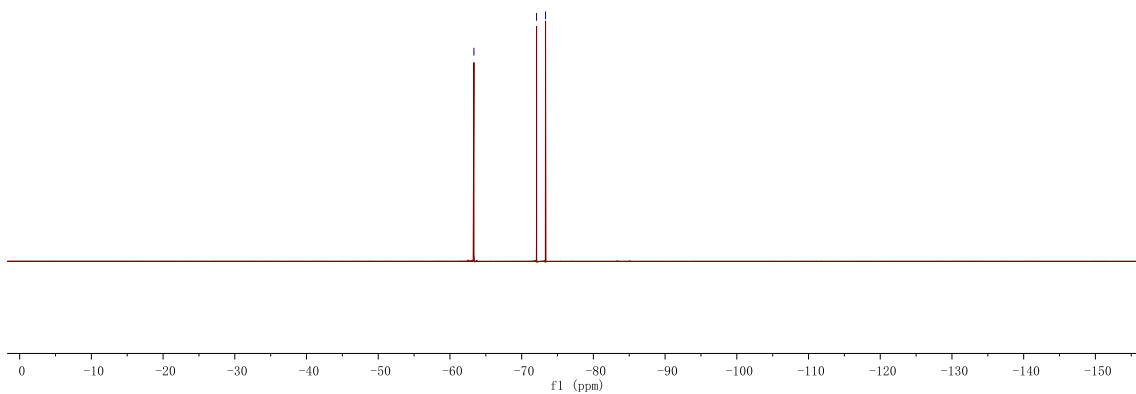

# <sup>19</sup>F NMR

— -62.55  
~ -70.21  
~ -72.10

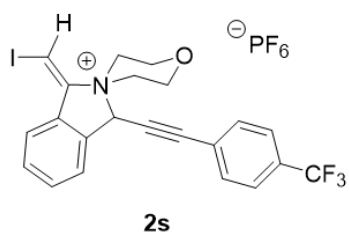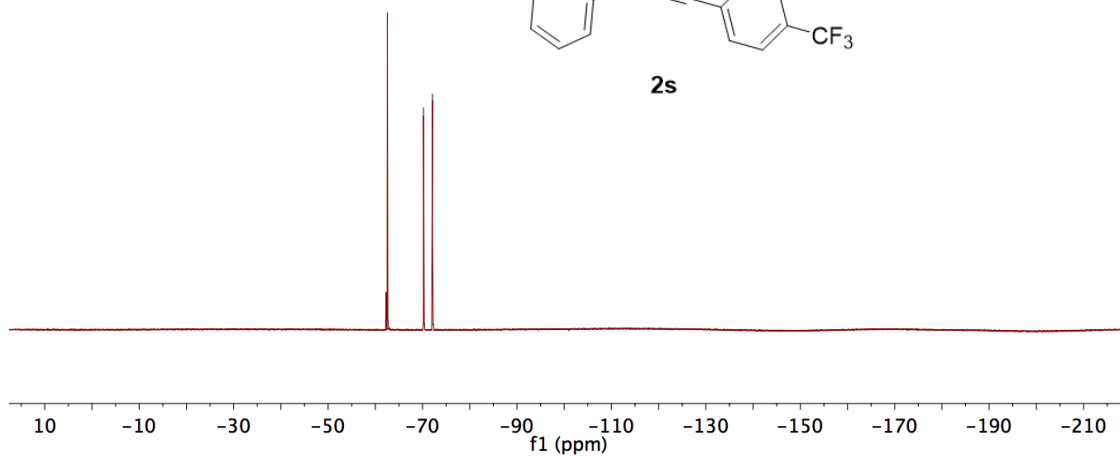

# <sup>19</sup>F NMR

yq-02-128

-69.46  
-70.72

-109.78

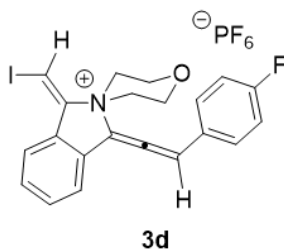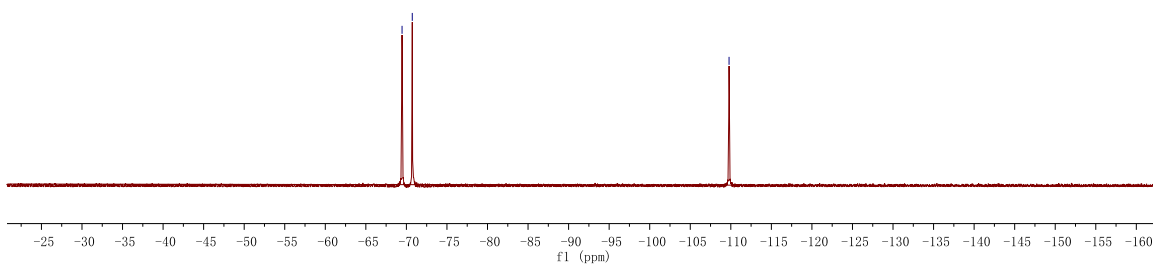

# <sup>19</sup>F NMR

-62.26  
-70.21  
-72.10

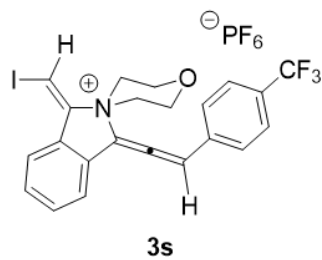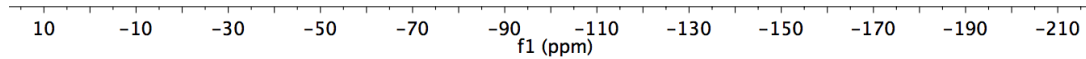

Supplement: d2ob00316c1.pdf [file d2ob00316c1.pdf]
